# Supplementary material
Source: Research Square preprint supplement (doi:10.21203/rs.3.rs-7754190/v1)
Supplement: Supplementary file 1 [file 4ff1f9e4d5038831cffd4695.xlsx]

## Sheet: Significant_Results
Clinical_Variable	Biomarker	N_with_feature	N_without_feature	Median_with_feature	Median_without_feature	P_value	Significant
Renal involvement	EMMPRIN CD147 T1	8	39	13932.1	8215.24	1.66891e-05	TRUE
Renal involvement	TIMP-1 T1	8	39	679888	328715	0.00013612	TRUE
Renal involvement	EMMPRIN FC	7	27	0.348245	0.805016	0.000345378	TRUE
Shock on admission	TIMP-1 T1	6	41	738699	333546	0.000500858	TRUE
Hypotension on admission	MMP-10/TIMP-1 T1	31	16	0.00240661	0.00561186	0.000670722	TRUE
Shock on admission	TIMPT total T1	6	41	1.02913e+06	577234	0.000713942	TRUE
Renal involvement	MMP-7 T1	8	39	6636.09	3080.23	0.000803129	TRUE
Pericardial effusion	EMMPRIN FC	8	26	0.366811	0.805184	0.000807658	TRUE
Hypotension on admission	TIMP-1 T2	24	10	393135	284108	0.00107779	TRUE
Pericardial effusion	MMP-3 T1	10	37	15261	6719.09	0.00121123	TRUE
Renal involvement	MMP-9/TIMP-1 T1	8	39	0.315	1.16	0.00144851	TRUE
Prolonged APTT or INR	MMP-2/TIMP-1 T1	17	30	0.73	1.095	0.00172683	TRUE
Hypotension on admission	TIMP-1 T1	31	16	386685	304848	0.00187457	TRUE
Renal involvement	MMP-2 T1	8	39	546259	335225	0.00192095	TRUE
Prolonged APTT or INR	TIMPT total T1	17	30	799375	553420	0.00233222	TRUE
Prolonged APTT or INR	TIMP-1 T1	17	30	466580	313876	0.00250977	TRUE
Decreased LV contractility	MMP-8/TIMP-4 T2	12	22	16.72	4.825	0.00261798	TRUE
Pericardial effusion	MMP-3/TIMP-2 T1	10	37	0.096383	0.051872	0.00317036	TRUE
Hypotension on admission	MMP-7/TIMP-1 T2	24	10	0.006909	0.0114115	0.00339809	TRUE
Hypotension on admission	MMP-7/TIMP-1 T1	31	16	0.00933	0.0119605	0.00420257	TRUE
Lymphopenia	MMP-7 T2	25	8	2687.82	3877.68	0.00424383	TRUE
Hypotension on admission	EMMPRIN FC	24	10	0.591386	0.84913	0.00432226	TRUE
Gastrointestinal involvement	MMP-9/TIMP-3 T2	24	10	2.55	1.22	0.00432226	TRUE
Shock on admission	MMP-7 T1	6	41	6562.86	3183.37	0.00473776	TRUE
Renal involvement	MMP-13/TIMP-1 T1	8	29	0.000952321	0.00315011	0.00495674	TRUE
Renal involvement	TIMPT total T1	8	39	911264	577234	0.00631558	TRUE
Shock on admission	TNF-alpha T1	6	40	75.645	35.8534	0.00645837	TRUE
Pericardial effusion	EMMPRIN CD147 T1	10	37	12556.7	8251.55	0.00660065	TRUE
Lymphopenia	MMP-7/TIMP-1 T2	25	8	0.00686	0.0135265	0.00670721	TRUE
Lymphopenia	MMP-10/TIMP-1 T1	32	14	0.00246466	0.00525772	0.00673728	TRUE
D dimer >2000 on admission	TIMP-1 FC	22	12	0.813451	1.09397	0.00725746	TRUE
Elevated troponin and/or NT-pro-BNP	TIMP-4 T1	35	12	2157.9	1424.34	0.00727731	TRUE
Shock on admission	TIMP-1 FC	4	30	0.567893	0.964224	0.0083664	TRUE
Renal involvement	TIMP-2 T1	8	39	150001	124917	0.00845832	TRUE
Shock on admission	MMP-10 T1	6	41	2301.37	798.872	0.00853648	TRUE
Shock on admission	MMP-3 T1	6	41	30607.6	8041.55	0.00855966	TRUE
Prolonged APTT or INR	MMP-13/TIMP-1 T1	13	24	0.0013622	0.00337358	0.00867318	TRUE
Prolonged APTT or INR	MMP-1/TIMP-1 T1	17	30	0.004196	0.0067975	0.00869972	TRUE
Prolonged APTT or INR	MMP-3/TIMP4 T2	13	21	8.85	3.53	0.00873004	TRUE
D dimer >2000 on admission	TIMP total FC	22	11	0.89864	1.07147	0.00889723	TRUE
Shock on admission	MMP-9/TIMP-1 T1	6	41	0.265	0.99	0.00894128	TRUE
Pericardial effusion	MMP-1 T1	10	37	4264.55	1866.85	0.00899161	TRUE
Hyponatremia	TIMP-4 T1	35	12	2151.6	1319.12	0.00903614	TRUE
Shock on admission	MMP-12 FC	4	30	0.578155	1	0.00942052	TRUE
Shock on admission	TIMP total FC	4	29	0.64733	0.967662	0.00948192	TRUE
Prolonged APTT or INR	MMP-8/TIMP-4 T2	13	21	13.04	4.78	0.00967572	TRUE
Renal involvement	MMP-7 FC	7	27	0.616321	0.84147	0.011035	TRUE
Hypotension on admission	MMP-8/TIMP-3 T2	24	10	0.096561	0.042014	0.0119487	TRUE
Pericardial effusion	MMP-3/TIMP-4 T1	10	37	8.835	5	0.012128	TRUE
Gastrointestinal involvement	MMP-3/TIMP-3 T2	24	10	0.105	0.0355745	0.0125976	TRUE
Gastrointestinal involvement	MMP-8/TIMP-3 T2	24	10	0.096561	0.0464175	0.0126044	TRUE
Gastrointestinal involvement	MMP-1/TIMP-4 T1	33	14	0.77	1.875	0.0136551	TRUE
Prolonged APTT or INR	MMP-13/TIMP-4 T1	13	24	0.2633	0.59545	0.0136783	TRUE
Decreased LV contractility	MMP-8 T1	18	28	78470.6	41921.8	0.0146038	TRUE
Decreased LV contractility	MMP-9/TIMP-4 T2	12	22	388.005	113	0.0149937	TRUE
Gastrointestinal involvement	MMP-1/TIMP-1 T1	33	14	0.004899	0.0069495	0.0150618	TRUE
Hospitalisation in the ICU	MMP-1/TIMP-1 T1	3	44	0.002224	0.0063555	0.0151711	TRUE
Shock on admission	MMP-8 T2	4	30	23719.2	7306.62	0.0154821	TRUE
Hypotension on admission	MMP-10/TIMP-4 T1	31	16	0.3909	1.0037	0.0158025	TRUE
Pericardial effusion	TNF-alpha FC	7	26	0.285528	0.61848	0.0159141	TRUE
Prolonged APTT or INR	TIMP-4 FC	13	21	0.547345	0.755802	0.0159605	TRUE
Renal involvement	MMP-7/TIMP-3 T1	8	39	0.094618	0.052543	0.016744	TRUE
Gastrointestinal involvement	MMP-13/TIMP-4 T1	28	9	0.39875	0.6791	0.0168725	TRUE
Shock on admission	MMP-8/TIMP-3 T2	4	30	0.45	0.0760435	0.0173688	TRUE
Decreased LV contractility	MMP-8/TIMP-1 T2	12	22	0.054093	0.018062	0.0173759	TRUE
Renal involvement	MMP-9/TIMP-2 T1	8	39	1.205	3.06	0.0174041	TRUE
Hospitalisation in the ICU	MMP-1 T1	3	44	880.79	2017.36	0.0181314	TRUE
Elevated troponin and/or NT-pro-BNP	MMP-8/TIMP-3 T2	24	10	0.09506	0.0444385	0.0181542	TRUE
Decreased LV contractility	MMP-8/TIMP-3 T2	12	22	0.195	0.0600465	0.0191491	TRUE
Elevated troponin and/or NT-pro-BNP	MMP-10/TIMP-4 T1	35	12	0.3909	0.9848	0.0198082	TRUE
Hypotension on admission	MMP-9 FC	24	10	0.812995	0.44152	0.0200997	TRUE
Hyponatremia	TIMP-2 T2	24	9	126089	104131	0.0201094	TRUE
Shock on admission	TIMP-4 T1	6	41	2508.32	1913.82	0.0208136	TRUE
Shock on admission	MMP-10/TIMP-2 T1	6	41	0.0124763	0.00676775	0.0217492	TRUE
Hyponatremia	MMP-1/TIMP-4 T1	35	12	0.77	2.03	0.0218041	TRUE
Pericardial effusion	TIMP-1 T2	8	26	430322	355893	0.0220319	TRUE
Pericardial effusion	TIMP-1 T1	10	37	477910	333546	0.0229387	TRUE
Lymphopenia	MMP-10 T1	32	14	776.78	1455.65	0.0233303	TRUE
Shock on admission	MMP-3/TIMP-3 T1	6	41	0.205	0.12	0.023394	TRUE
Decreased LV contractility	MMP-8/TIMP-3 T1	18	29	1.14	0.44	0.0234984	TRUE
Decreased LV contractility	TIMP-4 T1	18	29	2264.37	1591.11	0.0235024	TRUE
Hypotension on admission	MMP-10/TIMP-2 T1	31	16	0.00640094	0.00804301	0.0240524	TRUE
D dimer >2000 on admission	MMP-1/TIMP-1 T1	31	16	0.004899	0.00743	0.0240524	TRUE
Decreased LV contractility	MMP-3/TIMP4 T2	12	22	8.81	3.515	0.0243006	TRUE
D dimer >2000 on admission	MMP-9 FC	22	12	0.852129	0.452543	0.0243006	TRUE
Decreased LV contractility	MMP-9/TIMP-3 T2	12	22	3.88	1.515	0.0243006	TRUE
Hypotension on admission	MMP-1/TIMP-3 T2	24	10	0.096819	0.0362595	0.024454	TRUE
Hypotension on admission	MMP-12/TIMP-1 T2	24	10	0.000155326	0.00023335	0.0245196	TRUE
Renal involvement	MMP-2/TIMP-2 T2	7	26	4.22	2.6	0.024688	TRUE
Gastrointestinal involvement	TIMP total T2	24	9	579263	777258	0.0248675	TRUE
D dimer >2000 on admission	MMP-9/TIMP-1 T1	31	16	0.71	1.825	0.0254808	TRUE
Shock on admission	MMP-8/TIMP-1 T2	4	30	0.060176	0.019258	0.026525	TRUE
Elevated troponin and/or NT-pro-BNP	MMP-3/TIMP-3 T2	24	10	0.11	0.052824	0.0270061	TRUE
Pericardial effusion	TIMPT total T1	10	37	850420	577234	0.0280581	TRUE
Renal involvement	MMP-3 T1	8	39	13192.3	7755.74	0.0283509	TRUE
D dimer >2000 on admission	MMP-9/TIMP-2 T1	31	16	1.62	4.85	0.0285828	TRUE
Shock on admission	TIMP-2 T1	6	41	161601	127354	0.0287365	TRUE
Neurological involvement	MMP-1 T1	6	41	1204.73	2039.99	0.0287365	TRUE
Catecholamines use	TNF-alpha T1	3	43	74.94	36.1748	0.0292575	TRUE
Renal involvement	MMP-2/TIMP-2 T1	8	39	3.47	2.61	0.0292706	TRUE
Hypotension on admission	MMP-8/TIMP-3 T1	31	16	0.74	0.325	0.0294132	TRUE
Gastrointestinal involvement	MMP-13/TIMP-1 T1	28	9	0.00191732	0.00358365	0.0294749	TRUE
Elevated troponin and/or NT-pro-BNP	MMP-7/TIMP-1 T2	24	10	0.0070555	0.0114115	0.0297581	TRUE
Lymphopenia	MMP-13/TIMP-1 T1	26	10	0.00169769	0.00347197	0.0298487	TRUE
Hypotension on admission	MMP-12/TIMP-1 T1	31	16	0.000155803	0.000202487	0.0302738	TRUE
Prolonged APTT or INR	MMP-9/TIMP-4 T2	13	21	375.61	114.18	0.0306376	TRUE
Hyponatremia	MMP-1/TIMP-1 T1	35	12	0.005098	0.008535	0.0308363	TRUE
Renal involvement	MMP-12 T1	8	39	66.6577	55.86	0.0313475	TRUE
Lymphopenia	TIMP-1 T2	25	8	382865	312509	0.0318759	TRUE
Prolonged APTT or INR	TIMP-4 T1	17	30	2216.01	1643.17	0.0326249	TRUE
Lymphopenia	MMP-10/TIMP-2 T1	32	14	0.00658997	0.00910399	0.0326295	TRUE
Shock on admission	MMP-8/TIMP-2 T2	4	29	0.175	0.072387	0.0335807	TRUE
Decreased LV contractility	MMP-8/TIMP-2 T2	12	21	0.14	0.072387	0.0343555	TRUE
Gastrointestinal involvement	TIMP-1 FC	24	10	0.870964	1.06305	0.0359314	TRUE
Shock on admission	MMP-9 FC	4	30	2.00304	0.720314	0.0360963	TRUE
Shock on admission	MMP-9/TIMP-3 T2	4	30	5.1	1.705	0.0360963	TRUE
Decreased LV contractility	MMP-1/TIMP-1 T1	18	29	0.0045475	0.006903	0.0366213	TRUE
Renal involvement	MMP-10/TIMP-1 T1	8	39	0.00172947	0.00303349	0.0384278	TRUE
Pericardial effusion	MMP-3 FC	8	26	0.798132	1.18966	0.0385441	TRUE
Renal involvement	TNF-alpha FC	7	26	0.377358	0.61848	0.0385609	TRUE
Pericardial effusion	MMP-12 T1	10	37	74.3145	59.66	0.0386626	TRUE
Hypotension on admission	TIMP-3 T1	31	16	61022.1	89159.4	0.038682	TRUE
Elevated troponin and/or NT-pro-BNP	MMP-9 T2	24	10	245211	107471	0.0394075	TRUE
Elevated troponin and/or NT-pro-BNP	MMP-9/TIMP-3 T2	24	10	2.55	1.515	0.0394075	TRUE
Elevated troponin and/or NT-pro-BNP	MMP-3 T2	24	10	10765.1	4184.21	0.0394075	TRUE
Gastrointestinal involvement	MMP-8/TIMP-3 T1	33	14	0.81	0.325	0.0395062	TRUE
Gastrointestinal involvement	MMP-1/TIMP-2 T1	33	14	0.013358	0.0231925	0.0395233	TRUE
Gastrointestinal involvement	MMP-1 T1	33	14	1861.05	2517.3	0.0395233	TRUE
Lung involvement	MMP-7/TIMP-2 T2	27	6	0.023268	0.0304145	0.04003	TRUE
Decreased LV contractility	TIMP-4 FC	12	22	0.606607	0.767173	0.0417384	TRUE
Gastrointestinal involvement	MMP-7/TIMP-3 T1	33	14	0.077191	0.042531	0.0417776	TRUE
Shock on admission	MMP-12/TIMP-4 T2	4	30	0.0199435	0.0527673	0.0419614	TRUE
Gastrointestinal involvement	TIMP-4 FC	24	10	0.705205	0.873912	0.043165	TRUE
Prolonged APTT or INR	TIMP-1 FC	13	21	0.804382	1.01377	0.043384	TRUE
Pericardial effusion	MMP-1/TIMP-2 T1	10	37	0.0212625	0.013082	0.0439553	TRUE
Neurological involvement	MMP-1/TIMP-2 T1	6	41	0.0101	0.015539	0.04431	TRUE
D dimer >2000 on admission	TIMPT total T1	31	16	668349	520180	0.0445017	TRUE
Elevated troponin and/or NT-pro-BNP	MMP-13/TIMP-2 T2	22	6	0.00807746	0.0037738	0.0447577	TRUE
Hospitalisation in the ICU	MMP-1/TIMP-4 T1	3	44	0.35	1.36	0.0452589	TRUE
Elevated troponin and/or NT-pro-BNP	MMP-3/TIMP-2 T2	24	9	0.079479	0.03257	0.045311	TRUE
Decreased LV contractility	MMP-8 T2	12	22	18335	6868.51	0.0454915	TRUE
Renal involvement	MMP-9 T1	8	39	173159	363949	0.045967	TRUE
D dimer >2000 on admission	TNF-alpha T1	30	16	40.08	30.9657	0.046039	TRUE
Lymphopenia	MMP-10/TIMP-4 T1	32	14	0.3901	0.79875	0.0462203	TRUE
D dimer >2000 on admission	TIMP-1 T1	31	16	380881	313876	0.0469353	TRUE
Hyponatremia	MMP-8/TIMP-3 T2	24	10	0.094607	0.0548925	0.047204	TRUE
Hyponatremia	MMP-12/TIMP-1 T2	24	10	0.00014954	0.000227437	0.0472209	TRUE
Decreased LV contractility	MMP-9/TIMP-1 T2	12	22	1.215	0.435	0.0474384	TRUE
Pericardial effusion	MMP-2 FC	8	26	0.865308	1.03164	0.0474723	TRUE
Gastrointestinal involvement	TIMP-4 T1	33	14	2151.6	1526.7	0.0479972	TRUE
Pericardial effusion	MMP-1/TIMP-4 T1	10	37	1.995	0.99	0.0481697	TRUE
Pericardial effusion	MMP-9/TIMP-1 T1	10	37	0.58	0.99	0.0481891	TRUE
Lung involvement	MMP-7 T2	27	7	2656.08	3733.76	0.0484778	TRUE
Renal involvement	MMP-2 FC	7	27	0.813809	1.02815	0.0484778	TRUE
Prolonged APTT or INR	TIMP total FC	13	20	0.89625	0.991379	0.0487074	TRUE
Pericardial effusion	TIMP-3 T2	8	26	135287	86009.6	0.0488386	TRUE
Renal involvement	MMP-7/TIMP-4 T1	8	39	3.015	2.03	0.0491319	TRUE

## Sheet: All_Results
Clinical_Variable	Biomarker	N_with_feature	N_without_feature	Median_with_feature	Median_without_feature	P_value	Significant
Hypotension on admission	TIMP-1 T1	31	16	386685	304848	0.00187457	TRUE
Hypotension on admission	TIMP-1 T2	24	10	393135	284108	0.00107779	TRUE
Hypotension on admission	TIMP-1 FC	24	10	0.872406	1.03191	0.335141	FALSE
Hypotension on admission	TIMP-2 T1	31	16	140301	122137	0.18161	FALSE
Hypotension on admission	TIMP-2 T2	24	9	119174	108692	0.61336	FALSE
Hypotension on admission	TIMP-2 FC	24	9	0.89533	1.05606	0.3848	FALSE
Hypotension on admission	TIMP-3 T1	31	16	61022.1	89159.4	0.038682	TRUE
Hypotension on admission	TIMP-3 T2	24	10	94548.2	71958.7	0.460898	FALSE
Hypotension on admission	TIMP-3 FC	24	10	1.45143	0.955973	0.12583	FALSE
Hypotension on admission	TIMP-4 T1	31	16	2151.6	1558.9	0.0578028	FALSE
Hypotension on admission	TIMP-4 T2	24	10	1501.87	1068.92	0.663665	FALSE
Hypotension on admission	TIMP-4 FC	24	10	0.735848	0.669344	0.954788	FALSE
Hypotension on admission	TIMPT total T1	31	16	668349	573618	0.0858923	FALSE
Hypotension on admission	TIMP total T2	24	9	615683	552060	0.322001	FALSE
Hypotension on admission	TIMP total FC	24	9	0.943629	0.968207	0.585269	FALSE
Hypotension on admission	EMMPRIN CD147 T1	31	16	8388.72	9140.17	0.761826	FALSE
Hypotension on admission	EMMPRIN CD147 T2	24	10	5066.88	6723.23	0.0667836	FALSE
Hypotension on admission	EMMPRIN FC	24	10	0.591386	0.84913	0.00432226	TRUE
Hypotension on admission	MMP-1 T1	31	16	1994.73	1676.95	0.551882	FALSE
Hypotension on admission	MMP-1 T2	24	10	8984.24	3640.04	0.0613556	FALSE
Hypotension on admission	MMP-1 FC	24	10	3.06259	2.03167	0.08548	FALSE
Hypotension on admission	MMP-2 T1	31	16	372379	313141	0.28624	FALSE
Hypotension on admission	MMP-2 T2	24	10	338146	403085	0.748006	FALSE
Hypotension on admission	MMP-2 FC	24	10	0.928948	1.08636	0.08548	FALSE
Hypotension on admission	MMP-3 T1	31	16	9165.51	7891.22	0.196734	FALSE
Hypotension on admission	MMP-3 T2	24	10	10514.7	4336.66	0.233815	FALSE
Hypotension on admission	MMP-3 FC	24	10	0.955654	1.18966	0.984922	FALSE
Hypotension on admission	MMP-7 T1	31	16	3629.77	3544.25	0.507782	FALSE
Hypotension on admission	MMP-7 T2	24	10	2818.43	3795.72	0.08548	FALSE
Hypotension on admission	MMP-7 FC	24	10	0.670654	0.863406	0.167719	FALSE
Hypotension on admission	MMP-8 T1	31	15	59245.1	47244	0.174123	FALSE
Hypotension on admission	MMP-8 T2	24	10	10216.3	4010.82	0.135448	FALSE
Hypotension on admission	MMP-8 FC	24	10	0.204779	0.178491	0.335141	FALSE
Hypotension on admission	MMP-9 T1	31	16	236983	316275	0.848654	FALSE
Hypotension on admission	MMP-9 T2	24	10	227604	107471	0.108197	FALSE
Hypotension on admission	MMP-9 FC	24	10	0.812995	0.44152	0.0200997	TRUE
Hypotension on admission	MMP-10 T1	31	16	791.09	1106.76	0.0535062	FALSE
Hypotension on admission	MMP-10 T2	24	9	546.39	783.649	0.53092	FALSE
Hypotension on admission	MMP-10 FC	24	9	0.686719	0.574333	0.761761	FALSE
Hypotension on admission	MMP-12 T1	31	16	60.2851	59.66	1	FALSE
Hypotension on admission	MMP-12 T2	24	10	63.9583	67.7795	0.225374	FALSE
Hypotension on admission	MMP-12 FC	24	10	1	1.00151	0.2331	FALSE
Hypotension on admission	MMP-13 T1	27	10	981.56	1143.96	0.877518	FALSE
Hypotension on admission	MMP-13 T2	22	7	858.972	503.819	0.221044	FALSE
Hypotension on admission	MMP-13 FC	22	7	1.19277	1.22753	0.230988	FALSE
Hypotension on admission	TNF-alpha T1	30	16	37.93	31.985	0.169968	FALSE
Hypotension on admission	TNF-alpha T2	23	10	15.0902	19.6336	0.753949	FALSE
Hypotension on admission	TNF-alpha FC	23	10	0.545129	0.571594	0.421947	FALSE
Hypotension on admission	MMP-1/TIMP-1 T1	31	16	0.005581	0.0074375	0.12408	FALSE
Hypotension on admission	MMP-1/TIMP-1 T2	24	10	0.0224175	0.011668	0.335141	FALSE
Hypotension on admission	MMP-1/TIMP-2 T1	31	16	0.015152	0.01322	0.866284	FALSE
Hypotension on admission	MMP-1/TIMP-2 T2	24	9	0.0805665	0.034611	0.217463	FALSE
Hypotension on admission	MMP-1/TIMP-3 T1	31	16	0.040529	0.0145355	0.135445	FALSE
Hypotension on admission	MMP-1/TIMP-3 T2	24	10	0.096819	0.0362595	0.024454	TRUE
Hypotension on admission	MMP-1/TIMP-4 T1	31	16	0.99	1.73	0.566922	FALSE
Hypotension on admission	MMP-1/TIMP-4 T2	24	10	6.275	2.03	0.233815	FALSE
Hypotension on admission	MMP-2/TIMP-1 T1	31	16	0.82	1.215	0.0672272	FALSE
Hypotension on admission	MMP-2/TIMP-1 T2	24	10	0.85	1.145	0.0924057	FALSE
Hypotension on admission	MMP-2/TIMP-2 T1	31	16	2.64	2.485	0.451953	FALSE
Hypotension on admission	MMP-2/TIMP-2 T2	24	9	2.67	2.69	0.887473	FALSE
Hypotension on admission	MMP-2/TIMP-3 T1	31	16	6.36	5.22	0.234078	FALSE
Hypotension on admission	MMP-2/TIMP-3 T2	24	10	4.055	4.615	0.60982	FALSE
Hypotension on admission	MMP-2/TIMP-4 T1	31	16	172.57	174.18	0.711058	FALSE
Hypotension on admission	MMP-2/TIMP-4 T2	24	10	192.995	222.795	0.835322	FALSE
Hypotension on admission	MMP-3/TIMP-1 T1	31	16	0.020452	0.0267905	0.711058	FALSE
Hypotension on admission	MMP-3/TIMP-1 T2	24	10	0.0265025	0.015276	0.583659	FALSE
Hypotension on admission	MMP-3/TIMP-2 T1	31	16	0.072235	0.0538915	0.196669	FALSE
Hypotension on admission	MMP-3/TIMP-2 T2	24	9	0.079479	0.04769	0.232883	FALSE
Hypotension on admission	MMP-3/TIMP-3 T1	31	16	0.15	0.0830615	0.0685538	FALSE
Hypotension on admission	MMP-3/TIMP-3 T2	24	10	0.105	0.052824	0.0925303	FALSE
Hypotension on admission	MMP-3/TIMP-4 T1	31	16	5.29	5.72	0.848658	FALSE
Hypotension on admission	MMP-3/TIMP4 T2	24	10	6.75	3.68	0.438442	FALSE
Hypotension on admission	MMP-7/TIMP-1 T1	31	16	0.00933	0.0119605	0.00420257	TRUE
Hypotension on admission	MMP-7/TIMP-1 T2	24	10	0.006909	0.0114115	0.00339809	TRUE
Hypotension on admission	MMP-7/TIMP-2 T1	31	16	0.029678	0.033184	0.813641	FALSE
Hypotension on admission	MMP-7/TIMP-2 T2	24	9	0.0233915	0.023935	0.363082	FALSE
Hypotension on admission	MMP-7/TIMP-3 T1	31	16	0.075868	0.0446055	0.271227	FALSE
Hypotension on admission	MMP-7/TIMP-3 T2	24	10	0.028137	0.0378345	0.609875	FALSE
Hypotension on admission	MMP-7/TIMP-4 T1	31	16	1.94	2.85	0.124059	FALSE
Hypotension on admission	MMP-7/TIMP-4 T2	24	10	2.385	3.2	0.241286	FALSE
Hypotension on admission	MMP-8/TIMP-1 T1	31	16	0.1	0.145	0.946278	FALSE
Hypotension on admission	MMP-8/TIMP-1 T2	24	10	0.0282865	0.0129645	0.289882	FALSE
Hypotension on admission	MMP-8/TIMP-2 T1	31	16	0.41	0.39	0.286156	FALSE
Hypotension on admission	MMP-8/TIMP-2 T2	24	9	0.0788105	0.037544	0.248986	FALSE
Hypotension on admission	MMP-8/TIMP-3 T1	31	16	0.74	0.325	0.0294132	TRUE
Hypotension on admission	MMP-8/TIMP-3 T2	24	10	0.096561	0.042014	0.0119487	TRUE
Hypotension on admission	MMP-8/TIMP-4 T1	31	16	28.35	26.405	0.744776	FALSE
Hypotension on admission	MMP-8/TIMP-4 T2	24	10	8.21	3.8	0.264816	FALSE
Hypotension on admission	MMP-9/TIMP-1 T1	31	16	0.71	1.19	0.157211	FALSE
Hypotension on admission	MMP-9/TIMP-1 T2	24	10	0.64	0.425	0.532801	FALSE
Hypotension on admission	MMP-9/TIMP-2 T1	31	16	1.76	2.485	0.70268	FALSE
Hypotension on admission	MMP-9/TIMP-2 T2	24	9	2.315	1.21	0.275012	FALSE
Hypotension on admission	MMP-9/TIMP-3 T1	31	16	3.77	2.845	0.306987	FALSE
Hypotension on admission	MMP-9/TIMP-3 T2	24	10	2.55	1.395	0.0613556	FALSE
Hypotension on admission	MMP-9/TIMP-4 T1	24	10	127.17	111.64	0.484406	FALSE
Hypotension on admission	MMP-9/TIMP-4 T2	24	10	198.73	126.3	0.374424	FALSE
Hypotension on admission	MMP-10/TIMP-1 T1	31	16	0.00240661	0.00561186	0.000670722	TRUE
Hypotension on admission	MMP-10/TIMP-1 T2	24	9	0.00124868	0.00307045	0.0858038	FALSE
Hypotension on admission	MMP-10/TIMP-2 T1	31	16	0.00640094	0.00804301	0.0240524	TRUE
Hypotension on admission	MMP-10/TIMP-2 T2	24	8	0.00413741	0.00513066	0.356676	FALSE
Hypotension on admission	MMP-10/TIMP-3 T1	31	16	0.0119777	0.0115657	0.831108	FALSE
Hypotension on admission	MMP-10/TIMP-3 T2	24	9	0.00604573	0.00608568	1	FALSE
Hypotension on admission	MMP-10/TIMP-4 T1	31	16	0.3909	1.0037	0.0158025	TRUE
Hypotension on admission	MMP-10/TIMP-4 T2	24	9	0.4746	0.7381	0.302646	FALSE
Hypotension on admission	MMP-12/TIMP-1 T1	31	16	0.000155803	0.000202487	0.0302738	TRUE
Hypotension on admission	MMP-12/TIMP-1 T2	24	10	0.000155326	0.00023335	0.0245196	TRUE
Hypotension on admission	MMP-12/TIMP-2 T1	31	16	0.000471898	0.000510623	0.901728	FALSE
Hypotension on admission	MMP-12/TIMP-2 T2	24	9	0.000574818	0.000641883	0.28408	FALSE
Hypotension on admission	MMP-12/TIMP-3 T1	31	16	0.00087539	0.000619713	0.092211	FALSE
Hypotension on admission	MMP-12/TIMP-3 T2	24	10	0.000516814	0.000662028	0.894757	FALSE
Hypotension on admission	MMP-12/TIMP-4 T1	31	16	0.0258062	0.0397682	0.307015	FALSE
Hypotension on admission	MMP-12/TIMP-4 T2	24	10	0.0417596	0.0636199	0.281391	FALSE
Hypotension on admission	MMP-13/TIMP-1 T1	27	10	0.00223485	0.00335511	0.224719	FALSE
Hypotension on admission	MMP-13/TIMP-1 T2	22	7	0.00277233	0.00156644	0.635745	FALSE
Hypotension on admission	MMP-13/TIMP-2 T1	27	10	0.00647423	0.0074098	0.719526	FALSE
Hypotension on admission	MMP-13/TIMP-2 T2	22	6	0.00716905	0.00376581	0.0995488	FALSE
Hypotension on admission	MMP-13/TIMP-3 T1	27	10	0.0181797	0.0189566	0.538095	FALSE
Hypotension on admission	MMP-13/TIMP-3 T2	22	7	0.0122725	0.00688	0.328197	FALSE
Hypotension on admission	MMP-13/TIMP-4 T1	27	10	0.4264	0.47345	0.364787	FALSE
Hypotension on admission	MMP-13/TIMP-4 T2	22	7	0.9291	0.7162	0.284443	FALSE
Shock on admission	TIMP-1 T1	6	41	738699	333546	0.000500858	TRUE
Shock on admission	TIMP-1 T2	4	30	393904	366427	0.856909	FALSE
Shock on admission	TIMP-1 FC	4	30	0.567893	0.964224	0.0083664	TRUE
Shock on admission	TIMP-2 T1	6	41	161601	127354	0.0287365	TRUE
Shock on admission	TIMP-2 T2	4	29	129855	115517	0.377273	FALSE
Shock on admission	TIMP-2 FC	4	29	0.821446	0.978482	0.105425	FALSE
Shock on admission	TIMP-3 T1	6	41	69565.6	64442	0.773959	FALSE
Shock on admission	TIMP-3 T2	4	30	62984.3	93328.9	0.297042	FALSE
Shock on admission	TIMP-3 FC	4	30	1.05146	1.33614	0.588063	FALSE
Shock on admission	TIMP-4 T1	6	41	2508.32	1913.82	0.0208136	TRUE
Shock on admission	TIMP-4 T2	4	30	1773.82	1250.75	0.114666	FALSE
Shock on admission	TIMP-4 FC	4	30	0.759224	0.724486	0.856909	FALSE
Shock on admission	TIMPT total T1	6	41	1.02913e+06	577234	0.000713942	TRUE
Shock on admission	TIMP total T2	4	29	593954	605868	0.613245	FALSE
Shock on admission	TIMP total FC	4	29	0.64733	0.967662	0.00948192	TRUE
Shock on admission	EMMPRIN CD147 T1	6	41	12542.3	8728.07	0.124258	FALSE
Shock on admission	EMMPRIN CD147 T2	4	30	5466.4	5931.68	0.979386	FALSE
Shock on admission	EMMPRIN FC	4	30	0.374464	0.666967	0.104666	FALSE
Shock on admission	MMP-1 T1	6	41	2380.73	1990.11	0.938103	FALSE
Shock on admission	MMP-1 T2	4	30	3629.84	8660.35	0.117475	FALSE
Shock on admission	MMP-1 FC	4	30	1.75918	2.91063	0.146326	FALSE
Shock on admission	MMP-2 T1	6	41	406364	336397	0.251661	FALSE
Shock on admission	MMP-2 T2	4	30	338146	373794	0.816586	FALSE
Shock on admission	MMP-2 FC	4	30	0.832118	1.01513	0.0822839	FALSE
Shock on admission	MMP-3 T1	6	41	30607.6	8041.55	0.00855966	TRUE
Shock on admission	MMP-3 T2	4	30	12383.6	6240.04	0.117475	FALSE
Shock on admission	MMP-3 FC	4	30	0.921503	0.993991	0.938416	FALSE
Shock on admission	MMP-7 T1	6	41	6562.86	3183.37	0.00473776	TRUE
Shock on admission	MMP-7 T2	4	30	3463.28	2899.89	0.552915	FALSE
Shock on admission	MMP-7 FC	4	30	0.61993	0.75109	0.117475	FALSE
Shock on admission	MMP-8 T1	6	40	82779.2	47420.3	0.312693	FALSE
Shock on admission	MMP-8 T2	4	30	23719.2	7306.62	0.0154821	TRUE
Shock on admission	MMP-8 FC	4	30	0.354412	0.19684	0.131275	FALSE
Shock on admission	MMP-9 T1	6	41	149829	328761	0.107414	FALSE
Shock on admission	MMP-9 T2	4	30	358629	215395	0.363938	FALSE
Shock on admission	MMP-9 FC	4	30	2.00304	0.720314	0.0360963	TRUE
Shock on admission	MMP-10 T1	6	41	2301.37	798.872	0.00853648	TRUE
Shock on admission	MMP-10 T2	4	29	932.648	543.88	0.423779	FALSE
Shock on admission	MMP-10 FC	4	29	0.383008	0.687507	0.118622	FALSE
Shock on admission	MMP-12 T1	6	41	57.1	60.2851	0.701884	FALSE
Shock on admission	MMP-12 T2	4	30	35.475	66.84	0.0864301	FALSE
Shock on admission	MMP-12 FC	4	30	0.578155	1	0.00942052	TRUE
Shock on admission	MMP-13 T1	5	32	1008.15	1062.76	0.29579	FALSE
Shock on admission	MMP-13 T2	4	25	1410.36	805.377	0.392974	FALSE
Shock on admission	MMP-13 FC	4	25	1.20459	1.22753	0.77592	FALSE
Shock on admission	TNF-alpha T1	6	40	75.645	35.8534	0.00645837	TRUE
Shock on admission	TNF-alpha T2	4	29	51.085	15.0902	0.0645792	FALSE
Shock on admission	TNF-alpha FC	4	29	0.794984	0.539716	0.540225	FALSE
Shock on admission	MMP-1/TIMP-1 T1	6	41	0.0035615	0.006379	0.0765344	FALSE
Shock on admission	MMP-1/TIMP-1 T2	4	30	0.012303	0.0224175	0.179878	FALSE
Shock on admission	MMP-1/TIMP-2 T1	6	41	0.012483	0.014686	0.463481	FALSE
Shock on admission	MMP-1/TIMP-2 T2	4	29	0.028825	0.085565	0.0645345	FALSE
Shock on admission	MMP-1/TIMP-3 T1	6	41	0.038538	0.032689	0.720677	FALSE
Shock on admission	MMP-1/TIMP-3 T2	4	30	0.0467815	0.0673885	0.470334	FALSE
Shock on admission	MMP-1/TIMP-4 T1	6	41	0.975	1.01	0.49302	FALSE
Shock on admission	MMP-1/TIMP-4 T2	4	30	2.055	7.06	0.0557185	FALSE
Shock on admission	MMP-2/TIMP-1 T1	6	41	0.665	0.96	0.0822463	FALSE
Shock on admission	MMP-2/TIMP-1 T2	4	30	0.86	0.985	0.872532	FALSE
Shock on admission	MMP-2/TIMP-2 T1	6	41	2.29	2.64	0.885921	FALSE
Shock on admission	MMP-2/TIMP-2 T2	4	29	2.53	2.7	0.956004	FALSE
Shock on admission	MMP-2/TIMP-3 T1	6	41	6.48	5.85	0.503193	FALSE
Shock on admission	MMP-2/TIMP-3 T2	4	30	6.305	4.33	0.40731	FALSE
Shock on admission	MMP-2/TIMP-4 T1	6	41	130.945	181.5	0.585859	FALSE
Shock on admission	MMP-2/TIMP-4 T2	4	30	183.81	222.795	0.518587	FALSE
Shock on admission	MMP-3/TIMP-1 T1	6	41	0.03111	0.022166	0.564518	FALSE
Shock on admission	MMP-3/TIMP-1 T2	4	30	0.0583125	0.018888	0.0725806	FALSE
Shock on admission	MMP-3/TIMP-2 T1	6	41	0.119074	0.057728	0.0768053	FALSE
Shock on admission	MMP-3/TIMP-2 T2	4	29	0.0977565	0.058639	0.143647	FALSE
Shock on admission	MMP-3/TIMP-3 T1	6	41	0.205	0.12	0.023394	TRUE
Shock on admission	MMP-3/TIMP-3 T2	4	30	0.265	0.0746445	0.108755	FALSE
Shock on admission	MMP-3/TIMP-4 T1	6	41	12.245	5.29	0.0564591	FALSE
Shock on admission	MMP-3/TIMP4 T2	4	30	7.43	4.965	0.453295	FALSE
Shock on admission	MMP-7/TIMP-1 T1	6	41	0.009704	0.01087	0.380653	FALSE
Shock on admission	MMP-7/TIMP-1 T2	4	30	0.0083065	0.00754	0.485467	FALSE
Shock on admission	MMP-7/TIMP-2 T1	6	41	0.039366	0.029546	0.150329	FALSE
Shock on admission	MMP-7/TIMP-2 T2	4	29	0.026671	0.023378	0.690029	FALSE
Shock on admission	MMP-7/TIMP-3 T1	6	41	0.094618	0.064005	0.0716376	FALSE
Shock on admission	MMP-7/TIMP-3 T2	4	30	0.0554875	0.0302895	0.310376	FALSE
Shock on admission	MMP-7/TIMP-4 T1	6	41	2.68	2.33	0.47318	FALSE
Shock on admission	MMP-7/TIMP-4 T2	4	30	1.705	2.735	0.273142	FALSE
Shock on admission	MMP-8/TIMP-1 T1	6	41	0.0924785	0.14	0.453569	FALSE
Shock on admission	MMP-8/TIMP-1 T2	4	30	0.060176	0.019258	0.026525	TRUE
Shock on admission	MMP-8/TIMP-2 T1	6	41	0.37	0.41	0.961854	FALSE
Shock on admission	MMP-8/TIMP-2 T2	4	29	0.175	0.072387	0.0335807	TRUE
Shock on admission	MMP-8/TIMP-3 T1	6	41	1.225	0.47	0.225704	FALSE
Shock on admission	MMP-8/TIMP-3 T2	4	30	0.45	0.0760435	0.0173688	TRUE
Shock on admission	MMP-8/TIMP-4 T1	6	41	29.865	28.35	0.864322	FALSE
Shock on admission	MMP-8/TIMP-4 T2	4	30	10.345	6.185	0.438271	FALSE
Shock on admission	MMP-9/TIMP-1 T1	6	41	0.265	0.99	0.00894128	TRUE
Shock on admission	MMP-9/TIMP-1 T2	4	30	1.24	0.605	0.19027	FALSE
Shock on admission	MMP-9/TIMP-2 T1	6	41	1.205	2.63	0.0578266	FALSE
Shock on admission	MMP-9/TIMP-2 T2	4	29	2.855	2.28	0.362671	FALSE
Shock on admission	MMP-9/TIMP-3 T1	6	41	1.9	3.53	0.207927	FALSE
Shock on admission	MMP-9/TIMP-3 T2	4	30	5.1	1.705	0.0360963	TRUE
Shock on admission	MMP-9/TIMP-4 T1	4	30	126.56	124.335	0.938416	FALSE
Shock on admission	MMP-9/TIMP-4 T2	4	30	203.61	183.335	0.897447	FALSE
Shock on admission	MMP-10/TIMP-1 T1	6	41	0.00342297	0.00270585	0.42593	FALSE
Shock on admission	MMP-10/TIMP-1 T2	4	29	0.00250202	0.0014798	0.471505	FALSE
Shock on admission	MMP-10/TIMP-2 T1	6	41	0.0124763	0.00676775	0.0217492	TRUE
Shock on admission	MMP-10/TIMP-2 T2	4	28	0.00753296	0.00428842	0.680367	FALSE
Shock on admission	MMP-10/TIMP-3 T1	6	41	0.0359354	0.0101582	0.0659069	FALSE
Shock on admission	MMP-10/TIMP-3 T2	4	29	0.0215996	0.00596983	0.348485	FALSE
Shock on admission	MMP-10/TIMP-4 T1	6	41	0.92045	0.4782	0.293631	FALSE
Shock on admission	MMP-10/TIMP-4 T2	4	29	0.38175	0.6431	0.438807	FALSE
Shock on admission	MMP-12/TIMP-1 T1	6	41	0.000129625	0.000167344	0.372896	FALSE
Shock on admission	MMP-12/TIMP-1 T2	4	30	8.72717e-05	0.000171868	0.198422	FALSE
Shock on admission	MMP-12/TIMP-2 T1	6	41	0.000517123	0.00051049	0.697488	FALSE
Shock on admission	MMP-12/TIMP-2 T2	4	29	0.000265276	0.00058547	0.0631476	FALSE
Shock on admission	MMP-12/TIMP-3 T1	6	41	0.000784879	0.000861363	0.690264	FALSE
Shock on admission	MMP-12/TIMP-3 T2	4	30	0.000386491	0.000549612	0.624288	FALSE
Shock on admission	MMP-12/TIMP-4 T1	6	41	0.0228989	0.0318647	0.744118	FALSE
Shock on admission	MMP-12/TIMP-4 T2	4	30	0.0199435	0.0527673	0.0419614	TRUE
Shock on admission	MMP-13/TIMP-1 T1	5	32	0.00173091	0.00270179	0.32805	FALSE
Shock on admission	MMP-13/TIMP-1 T2	4	25	0.00440406	0.00237016	0.160414	FALSE
Shock on admission	MMP-13/TIMP-2 T1	5	32	0.00576298	0.00678325	0.914331	FALSE
Shock on admission	MMP-13/TIMP-2 T2	4	24	0.0108633	0.00674382	0.426862	FALSE
Shock on admission	MMP-13/TIMP-3 T1	5	32	0.0170585	0.0189566	0.929187	FALSE
Shock on admission	MMP-13/TIMP-3 T2	4	25	0.0199409	0.00961303	0.340954	FALSE
Shock on admission	MMP-13/TIMP-4 T1	5	32	0.5556	0.43185	0.982833	FALSE
Shock on admission	MMP-13/TIMP-4 T2	4	25	0.7536	0.7271	0.635215	FALSE
Hospitalisation in the ICU	TIMP-1 T1	3	44	389443	343746	0.301326	FALSE
Hospitalisation in the ICU	TIMP-2 T1	3	44	104552	130394	0.547764	FALSE
Hospitalisation in the ICU	TIMP-3 T1	3	44	57540.8	66123.9	0.930571	FALSE
Hospitalisation in the ICU	TIMP-4 T1	3	44	2480.06	1980.84	0.396061	FALSE
Hospitalisation in the ICU	TIMPT total T1	3	44	799375	622814	0.465742	FALSE
Hospitalisation in the ICU	EMMPRIN CD147 T1	3	44	6453.51	9165.41	0.0875732	FALSE
Hospitalisation in the ICU	MMP-1 T1	3	44	880.79	2017.36	0.0181314	TRUE
Hospitalisation in the ICU	MMP-2 T1	3	44	383790	344118	0.983657	FALSE
Hospitalisation in the ICU	MMP-3 T1	3	44	64309.9	8894.82	0.1284	FALSE
Hospitalisation in the ICU	MMP-7 T1	3	44	4558.82	3544.25	0.821708	FALSE
Hospitalisation in the ICU	MMP-8 T1	3	43	33142.8	59245.1	0.280369	FALSE
Hospitalisation in the ICU	MMP-9 T1	3	44	149190	298680	0.133236	FALSE
Hospitalisation in the ICU	MMP-10 T1	3	44	1374.23	838.205	0.267095	FALSE
Hospitalisation in the ICU	MMP-12 T1	3	44	55.7467	60.2851	0.446029	FALSE
Hospitalisation in the ICU	TNF-alpha T1	3	43	74.94	36.2	0.212869	FALSE
Hospitalisation in the ICU	MMP-1/TIMP-1 T1	3	44	0.002224	0.0063555	0.0151711	TRUE
Hospitalisation in the ICU	MMP-1/TIMP-2 T1	3	44	0.008424	0.0150725	0.0564909	FALSE
Hospitalisation in the ICU	MMP-1/TIMP-3 T1	3	44	0.015551	0.034175	0.0968239	FALSE
Hospitalisation in the ICU	MMP-1/TIMP-4 T1	3	44	0.35	1.36	0.0452589	TRUE
Hospitalisation in the ICU	MMP-2/TIMP-1 T1	3	44	0.82	0.94	0.513794	FALSE
Hospitalisation in the ICU	MMP-2/TIMP-2 T1	3	44	2.73	2.625	0.527984	FALSE
Hospitalisation in the ICU	MMP-2/TIMP-3 T1	3	44	6.78	5.815	0.965286	FALSE
Hospitalisation in the ICU	MMP-2/TIMP-4 T1	3	44	104.7	177.035	0.547764	FALSE
Hospitalisation in the ICU	MMP-3/TIMP-1 T1	3	44	0.12	0.021905	0.166142	FALSE
Hospitalisation in the ICU	MMP-3/TIMP-2 T1	3	44	0.39	0.0620765	0.0643363	FALSE
Hospitalisation in the ICU	MMP-3/TIMP-3 T1	3	44	0.19	0.12	0.230662	FALSE
Hospitalisation in the ICU	MMP-3/TIMP-4 T1	3	44	14.81	5.315	0.0789393	FALSE
Hospitalisation in the ICU	MMP-7/TIMP-1 T1	3	44	0.009275	0.0107275	0.267095	FALSE
Hospitalisation in the ICU	MMP-7/TIMP-2 T1	3	44	0.030881	0.030138	0.853777	FALSE
Hospitalisation in the ICU	MMP-7/TIMP-3 T1	3	44	0.023941	0.0684825	0.446239	FALSE
Hospitalisation in the ICU	MMP-7/TIMP-4 T1	3	44	1.19	2.49	0.133225	FALSE
Hospitalisation in the ICU	MMP-8/TIMP-1 T1	3	44	0.071075	0.13	0.199009	FALSE
Hospitalisation in the ICU	MMP-8/TIMP-2 T1	3	44	0.24	0.415	0.338268	FALSE
Hospitalisation in the ICU	MMP-8/TIMP-3 T1	3	44	0.45	0.655	0.33831	FALSE
Hospitalisation in the ICU	MMP-8/TIMP-4 T1	3	44	13.75	28.805	0.195005	FALSE
Hospitalisation in the ICU	MMP-9/TIMP-1 T1	3	44	0.38	0.97	0.0643517	FALSE
Hospitalisation in the ICU	MMP-9/TIMP-2 T1	3	44	1.39	2.47	0.199152	FALSE
Hospitalisation in the ICU	MMP-9/TIMP-3 T1	3	44	1.47	3.39	0.18437	FALSE
Hospitalisation in the ICU	MMP-10/TIMP-1 T1	3	44	0.00303349	0.00273449	0.695899	FALSE
Hospitalisation in the ICU	MMP-10/TIMP-2 T1	3	44	0.0128591	0.00717383	0.166142	FALSE
Hospitalisation in the ICU	MMP-10/TIMP-3 T1	3	44	0.0242627	0.0112451	0.951095	FALSE
Hospitalisation in the ICU	MMP-10/TIMP-4 T1	3	44	0.4763	0.48155	0.983657	FALSE
Hospitalisation in the ICU	MMP-12/TIMP-1 T1	3	44	0.000155803	0.000167682	0.281468	FALSE
Hospitalisation in the ICU	MMP-12/TIMP-2 T1	3	44	0.000533195	0.000491194	0.918532	FALSE
Hospitalisation in the ICU	MMP-12/TIMP-3 T1	3	44	0.000603919	0.00084758	0.446292	FALSE
Hospitalisation in the ICU	MMP-12/TIMP-4 T1	3	44	0.0255316	0.0317669	0.439716	FALSE
Catecholamines use	TIMP-1 T1	3	44	464621	343746	0.152821	FALSE
Catecholamines use	TIMP-2 T1	3	44	152881	129759	0.635214	FALSE
Catecholamines use	TIMP-3 T1	3	44	61022.1	66123.9	0.930571	FALSE
Catecholamines use	TIMP-4 T1	3	44	2480.06	1933.26	0.0708933	FALSE
Catecholamines use	TIMPT total T1	3	44	799375	604464	0.152821	FALSE
Catecholamines use	EMMPRIN CD147 T1	3	44	8091.59	8837.61	0.519766	FALSE
Catecholamines use	MMP-1 T1	3	44	1040.33	1992.42	0.366574	FALSE
Catecholamines use	MMP-2 T1	3	44	348333	349218	0.918532	FALSE
Catecholamines use	MMP-3 T1	3	44	64309.9	8894.82	0.117175	FALSE
Catecholamines use	MMP-7 T1	3	44	5259.72	3379.3	0.152821	FALSE
Catecholamines use	MMP-8 T1	3	43	34089.6	52127	0.933333	FALSE
Catecholamines use	MMP-9 T1	3	44	236983	252863	0.91336	FALSE
Catecholamines use	MMP-10 T1	3	44	1578.85	838.205	0.12235	FALSE
Catecholamines use	MMP-12 T1	3	44	44.91	60.2851	0.295976	FALSE
Catecholamines use	TNF-alpha T1	3	43	74.94	36.1748	0.0292575	TRUE
Catecholamines use	MMP-1/TIMP-1 T1	3	44	0.002224	0.0063305	0.227074	FALSE
Catecholamines use	MMP-1/TIMP-2 T1	3	44	0.009427	0.0148395	0.390133	FALSE
Catecholamines use	MMP-1/TIMP-3 T1	3	44	0.01808	0.0328245	0.547764	FALSE
Catecholamines use	MMP-1/TIMP-4 T1	3	44	0.35	1.11	0.122296	FALSE
Catecholamines use	MMP-2/TIMP-1 T1	3	44	0.75	0.955	0.1991	FALSE
Catecholamines use	MMP-2/TIMP-2 T1	3	44	2.28	2.635	0.744104	FALSE
Catecholamines use	MMP-2/TIMP-3 T1	3	44	5.71	5.865	0.793997	FALSE
Catecholamines use	MMP-2/TIMP-4 T1	3	44	104.7	186.07	0.166142	FALSE
Catecholamines use	MMP-3/TIMP-1 T1	3	44	0.12	0.021905	0.262473	FALSE
Catecholamines use	MMP-3/TIMP-2 T1	3	44	0.39	0.0620765	0.184332	FALSE
Catecholamines use	MMP-3/TIMP-3 T1	3	44	0.19	0.12	0.305691	FALSE
Catecholamines use	MMP-3/TIMP-4 T1	3	44	14.81	5.315	0.195005	FALSE
Catecholamines use	MMP-7/TIMP-1 T1	3	44	0.011706	0.0104555	0.647695	FALSE
Catecholamines use	MMP-7/TIMP-2 T1	3	44	0.049622	0.029612	0.140241	FALSE
Catecholamines use	MMP-7/TIMP-3 T1	3	44	0.091408	0.064535	0.556803	FALSE
Catecholamines use	MMP-7/TIMP-4 T1	3	44	1.84	2.37	0.844729	FALSE
Catecholamines use	MMP-8/TIMP-1 T1	3	44	0.087534	0.115	0.616589	FALSE
Catecholamines use	MMP-8/TIMP-2 T1	3	44	0.37	0.405	0.930629	FALSE
Catecholamines use	MMP-8/TIMP-3 T1	3	44	0.58	0.57	0.913355	FALSE
Catecholamines use	MMP-8/TIMP-4 T1	3	44	13.75	28.36	0.547764	FALSE
Catecholamines use	MMP-9/TIMP-1 T1	3	44	0.42	0.885	0.472676	FALSE
Catecholamines use	MMP-9/TIMP-2 T1	3	44	1.62	2.11	1	FALSE
Catecholamines use	MMP-9/TIMP-3 T1	3	44	4.12	3.19	0.982639	FALSE
Catecholamines use	MMP-10/TIMP-1 T1	3	44	0.00303349	0.00273449	0.465742	FALSE
Catecholamines use	MMP-10/TIMP-2 T1	3	44	0.0128591	0.00717383	0.0968239	FALSE
Catecholamines use	MMP-10/TIMP-3 T1	3	44	0.0274388	0.0112451	0.57638	FALSE
Catecholamines use	MMP-10/TIMP-4 T1	3	44	0.4763	0.48155	0.853777	FALSE
Catecholamines use	MMP-12/TIMP-1 T1	3	44	9.66594e-05	0.000167682	0.0875732	FALSE
Catecholamines use	MMP-12/TIMP-2 T1	3	44	0.000293758	0.000510623	0.414554	FALSE
Catecholamines use	MMP-12/TIMP-3 T1	3	44	0.000603919	0.000864706	0.199191	FALSE
Catecholamines use	MMP-12/TIMP-4 T1	3	44	0.0202662	0.0328882	0.0875732	FALSE
Neurological involvement	TIMP-1 T1	6	41	311530	346720	0.308557	FALSE
Neurological involvement	TIMP-1 T2	3	31	371301	366683	1	FALSE
Neurological involvement	TIMP-1 FC	3	31	0.914427	0.964163	0.603944	FALSE
Neurological involvement	TIMP-2 T1	6	41	114091	130933	0.607553	FALSE
Neurological involvement	TIMP-2 T2	3	30	134145	116595	0.97654	FALSE
Neurological involvement	TIMP-2 FC	3	30	0.785312	0.944597	0.260264	FALSE
Neurological involvement	TIMP-3 T1	6	41	79067.2	64442	0.749642	FALSE
Neurological involvement	TIMP-3 T2	3	31	70687.9	93127.7	0.429708	FALSE
Neurological involvement	TIMP-3 FC	3	31	1.1302	1.33655	0.687834	FALSE
Neurological involvement	TIMP-4 T1	6	41	2507.68	1952.7	0.346971	FALSE
Neurological involvement	TIMP-4 T2	3	31	1712.53	1461.93	0.670677	FALSE
Neurological involvement	TIMP-4 FC	3	31	0.564044	0.737342	0.171791	FALSE
Neurological involvement	TIMPT total T1	6	41	605018	624613	0.79166	FALSE
Neurological involvement	TIMP total T2	3	30	603209	607991	0.530792	FALSE
Neurological involvement	TIMP total FC	3	30	0.933741	0.955458	0.700513	FALSE
Neurological involvement	EMMPRIN CD147 T1	6	41	9155.75	8728.07	0.744118	FALSE
Neurological involvement	EMMPRIN CD147 T2	3	31	4898.43	6111.9	0.730949	FALSE
Neurological involvement	EMMPRIN FC	3	31	0.639631	0.648316	0.909091	FALSE
Neurological involvement	MMP-1 T1	6	41	1204.73	2039.99	0.0287365	TRUE
Neurological involvement	MMP-1 T2	3	31	3136.05	8585.21	0.603944	FALSE
Neurological involvement	MMP-1 FC	3	31	3.8221	2.73348	0.485963	FALSE
Neurological involvement	MMP-2 T1	6	41	260810	366890	0.20217	FALSE
Neurological involvement	MMP-2 T2	3	31	312662	356281	1	FALSE
Neurological involvement	MMP-2 FC	3	31	1.06117	0.962064	0.954545	FALSE
Neurological involvement	MMP-3 T1	6	41	4551.36	9734.38	0.0765344	FALSE
Neurological involvement	MMP-3 T2	3	31	14744.5	7996.32	0.237299	FALSE
Neurological involvement	MMP-3 FC	3	31	1.28894	0.99042	0.317513	FALSE
Neurological involvement	MMP-7 T1	6	41	3602.55	3558.05	0.482892	FALSE
Neurological involvement	MMP-7 T2	3	31	2656.08	3002.15	1	FALSE
Neurological involvement	MMP-7 FC	3	31	0.559535	0.704453	0.347928	FALSE
Neurological involvement	MMP-8 T1	6	40	62206.1	49861.8	0.91143	FALSE
Neurological involvement	MMP-8 T2	3	31	4143.11	9184.66	0.485963	FALSE
Neurological involvement	MMP-8 FC	3	31	0.189286	0.205163	0.41377	FALSE
Neurological involvement	MMP-9 T1	6	41	365007	236983	0.20794	FALSE
Neurological involvement	MMP-9 T2	3	31	163554	216978	0.954545	FALSE
Neurological involvement	MMP-9 FC	3	31	0.468655	0.751047	0.41377	FALSE
Neurological involvement	MMP-10 T1	6	41	807.315	924.075	0.761998	FALSE
Neurological involvement	MMP-12 T1	6	41	65.075	59.66	0.544471	FALSE
Neurological involvement	MMP-12 T2	3	31	68.7189	66.6767	0.692398	FALSE
Neurological involvement	MMP-12 FC	3	31	1	1	0.903199	FALSE
Neurological involvement	MMP-13 T1	4	33	1062.76	1008.15	0.659335	FALSE
Neurological involvement	MMP-13 T2	3	26	1008.15	807.933	0.801997	FALSE
Neurological involvement	MMP-13 FC	3	26	1.32401	1.14452	0.914447	FALSE
Neurological involvement	TNF-alpha T1	6	40	37.5009	37.065	0.986988	FALSE
Neurological involvement	TNF-alpha T2	3	30	18.4372	15.1801	0.975017	FALSE
Neurological involvement	TNF-alpha FC	3	30	0.310906	0.560318	0.234604	FALSE
Neurological involvement	MMP-1/TIMP-1 T1	6	41	0.004502	0.006329	0.356118	FALSE
Neurological involvement	MMP-1/TIMP-1 T2	3	31	0.011842	0.02157	0.645388	FALSE
Neurological involvement	MMP-1/TIMP-2 T1	6	41	0.0101	0.015539	0.04431	TRUE
Neurological involvement	MMP-1/TIMP-2 T2	3	30	0.034611	0.071276	0.594401	FALSE
Neurological involvement	MMP-1/TIMP-3 T1	6	41	0.0142505	0.03296	0.132547	FALSE
Neurological involvement	MMP-1/TIMP-3 T2	3	31	0.047085	0.065612	0.879294	FALSE
Neurological involvement	MMP-1/TIMP-4 T1	6	41	0.385	1.21	0.0557401	FALSE
Neurological involvement	MMP-1/TIMP-4 T2	3	31	1.83	5.92	0.563503	FALSE
Neurological involvement	MMP-2/TIMP-1 T1	6	41	1	0.93	0.923792	FALSE
Neurological involvement	MMP-2/TIMP-1 T2	3	31	0.99	0.88	0.808005	FALSE
Neurological involvement	MMP-2/TIMP-2 T1	6	41	2.35	2.64	0.25772	FALSE
Neurological involvement	MMP-2/TIMP-2 T2	3	30	2.88	2.665	0.826482	FALSE
Neurological involvement	MMP-2/TIMP-3 T1	6	41	3.375	5.88	0.398215	FALSE
Neurological involvement	MMP-2/TIMP-3 T2	3	31	5.12	4.26	0.504136	FALSE
Neurological involvement	MMP-2/TIMP-4 T1	6	41	88.635	181.5	0.190927	FALSE
Neurological involvement	MMP-2/TIMP-4 T2	3	31	152.52	194.24	0.485963	FALSE
Neurological involvement	MMP-3/TIMP-1 T1	6	41	0.0174325	0.022901	0.20217	FALSE
Neurological involvement	MMP-3/TIMP-1 T2	3	31	0.03971	0.021786	0.262366	FALSE
Neurological involvement	MMP-3/TIMP-2 T1	6	41	0.0452095	0.072235	0.094154	FALSE
Neurological involvement	MMP-3/TIMP-2 T2	3	30	0.11	0.0659575	0.286864	FALSE
Neurological involvement	MMP-3/TIMP-3 T1	6	41	0.0400905	0.13	0.137627	FALSE
Neurological involvement	MMP-3/TIMP-3 T2	3	31	0.15	0.074125	0.224542	FALSE
Neurological involvement	MMP-3/TIMP-4 T1	6	41	2.065	5.58	0.0948781	FALSE
Neurological involvement	MMP-3/TIMP4 T2	3	31	8.85	5.3	0.687834	FALSE
Neurological involvement	MMP-7/TIMP-1 T1	6	41	0.0113865	0.010326	0.292785	FALSE
Neurological involvement	MMP-7/TIMP-1 T2	3	31	0.007153	0.007841	1	FALSE
Neurological involvement	MMP-7/TIMP-2 T1	6	41	0.0285245	0.030881	0.65192	FALSE
Neurological involvement	MMP-7/TIMP-2 T2	3	30	0.019596	0.02367	0.656525	FALSE
Neurological involvement	MMP-7/TIMP-3 T1	6	41	0.0699365	0.0649	0.761972	FALSE
Neurological involvement	MMP-7/TIMP-3 T2	3	31	0.034217	0.028481	0.317513	FALSE
Neurological involvement	MMP-7/TIMP-4 T1	6	41	2.02	2.33	0.690255	FALSE
Neurological involvement	MMP-7/TIMP-4 T2	3	31	3.32	2.46	0.808091	FALSE
Neurological involvement	MMP-8/TIMP-1 T1	6	41	0.163702	0.11	0.835774	FALSE
Neurological involvement	MMP-8/TIMP-1 T2	3	31	0.011158	0.027936	0.466205	FALSE
Neurological involvement	MMP-8/TIMP-2 T1	6	41	0.48	0.4	0.835816	FALSE
Neurological involvement	MMP-8/TIMP-2 T2	3	30	0.030567	0.0788105	0.433449	FALSE
Neurological involvement	MMP-8/TIMP-3 T1	6	41	0.365	0.64	0.678537	FALSE
Neurological involvement	MMP-8/TIMP-3 T2	3	31	0.043353	0.092226	0.627124	FALSE
Neurological involvement	MMP-8/TIMP-4 T1	6	41	21.09	28.35	0.502709	FALSE
Neurological involvement	MMP-8/TIMP-4 T2	3	31	5.18	7.65	0.362382	FALSE
Neurological involvement	MMP-9/TIMP-1 T1	6	41	1.465	0.76	0.12993	FALSE
Neurological involvement	MMP-9/TIMP-1 T2	3	31	0.44	0.62	0.808077	FALSE
Neurological involvement	MMP-9/TIMP-2 T1	6	41	3.275	1.76	0.231855	FALSE
Neurological involvement	MMP-9/TIMP-2 T2	3	30	1.21	2.28	1	FALSE
Neurological involvement	MMP-9/TIMP-3 T1	6	41	3.47	3.25	0.749873	FALSE
Neurological involvement	MMP-9/TIMP-3 T2	3	31	1.71	2.07	0.563503	FALSE
Neurological involvement	MMP-9/TIMP-4 T1	3	31	107.79	134.57	0.563503	FALSE
Neurological involvement	MMP-9/TIMP-4 T2	3	31	204.59	177.6	0.819184	FALSE
Neurological involvement	MMP-10/TIMP-1 T1	6	41	0.0031272	0.00276312	0.864322	FALSE
Neurological involvement	MMP-10/TIMP-2 T1	6	41	0.0076654	0.00759441	0.962837	FALSE
Neurological involvement	MMP-10/TIMP-3 T1	6	41	0.0104473	0.0126189	0.463481	FALSE
Neurological involvement	MMP-10/TIMP-4 T1	6	41	0.37055	0.4849	0.308557	FALSE
Neurological involvement	MMP-12/TIMP-1 T1	6	41	0.000223919	0.000162591	0.213856	FALSE
Neurological involvement	MMP-12/TIMP-1 T2	3	31	0.000185076	0.000158318	0.774733	FALSE
Neurological involvement	MMP-12/TIMP-2 T1	6	41	0.000469448	0.00051049	0.815719	FALSE
Neurological involvement	MMP-12/TIMP-2 T2	3	30	0.000506991	0.000585062	1	FALSE
Neurological involvement	MMP-12/TIMP-3 T1	6	41	0.000983177	0.000828299	1	FALSE
Neurological involvement	MMP-12/TIMP-3 T2	3	31	0.00071907	0.000525301	0.289104	FALSE
Neurological involvement	MMP-12/TIMP-4 T1	6	41	0.0361616	0.0298959	0.79166	FALSE
Neurological involvement	MMP-12/TIMP-4 T2	3	31	0.0859625	0.045468	0.687834	FALSE
Neurological involvement	MMP-13/TIMP-1 T1	4	33	0.00271941	0.00238056	1	FALSE
Neurological involvement	MMP-13/TIMP-1 T2	3	26	0.00271518	0.00259982	0.659551	FALSE
Neurological involvement	MMP-13/TIMP-2 T1	4	33	0.00714757	0.00647423	0.981149	FALSE
Neurological involvement	MMP-13/TIMP-2 T2	3	25	0.00743787	0.0065874	0.888889	FALSE
Neurological involvement	MMP-13/TIMP-3 T1	4	33	0.0193956	0.0187466	1	FALSE
Neurological involvement	MMP-13/TIMP-3 T2	3	26	0.0105492	0.011849	0.866448	FALSE
Neurological involvement	MMP-13/TIMP-4 T1	4	33	0.3249	0.4559	0.354334	FALSE
Neurological involvement	MMP-13/TIMP-4 T2	3	26	0.5789	0.7411	0.452043	FALSE
Gastrointestinal involvement	TIMP-1 T1	33	14	369251	326381	0.279391	FALSE
Gastrointestinal involvement	TIMP-1 T2	24	10	375557	332563	0.984922	FALSE
Gastrointestinal involvement	TIMP-1 FC	24	10	0.870964	1.06305	0.0359314	TRUE
Gastrointestinal involvement	TIMP-2 T1	33	14	135115	129759	0.753492	FALSE
Gastrointestinal involvement	TIMP-2 T2	24	9	116595	118035	0.792746	FALSE
Gastrointestinal involvement	TIMP-2 FC	24	9	0.880095	1.02842	0.249303	FALSE
Gastrointestinal involvement	TIMP-3 T1	33	14	62568.1	75279.1	0.339723	FALSE
Gastrointestinal involvement	TIMP-3 T2	24	10	88557.2	129234	0.0639002	FALSE
Gastrointestinal involvement	TIMP-3 FC	24	10	1.39227	1.04437	0.281391	FALSE
Gastrointestinal involvement	TIMP-4 T1	33	14	2151.6	1526.7	0.0479972	TRUE
Gastrointestinal involvement	TIMP-4 T2	24	10	1554.22	1179.14	0.776714	FALSE
Gastrointestinal involvement	TIMP-4 FC	24	10	0.705205	0.873912	0.043165	TRUE
Gastrointestinal involvement	TIMPT total T1	33	14	623368	600923	0.91663	FALSE
Gastrointestinal involvement	TIMP total T2	24	9	579263	777258	0.0248675	TRUE
Gastrointestinal involvement	TIMP total FC	24	9	0.943629	0.968207	0.28408	FALSE
Gastrointestinal involvement	EMMPRIN CD147 T1	33	14	8812.36	8814.96	0.701108	FALSE
Gastrointestinal involvement	EMMPRIN CD147 T2	24	10	5657.57	6360.32	0.636602	FALSE
Gastrointestinal involvement	EMMPRIN FC	24	10	0.609532	0.805663	0.108197	FALSE
Gastrointestinal involvement	MMP-1 T1	33	14	1861.05	2517.3	0.0395233	TRUE
Gastrointestinal involvement	MMP-1 T2	24	10	6560.33	9157.97	0.66381	FALSE
Gastrointestinal involvement	MMP-1 FC	24	10	3.46179	2.23885	0.192241	FALSE
Gastrointestinal involvement	MMP-2 T1	33	14	348333	346879	0.91663	FALSE
Gastrointestinal involvement	MMP-2 T2	24	10	338146	399270	0.954788	FALSE
Gastrointestinal involvement	MMP-2 FC	24	10	0.969772	0.988374	0.924719	FALSE
Gastrointestinal involvement	MMP-3 T1	33	14	9063.35	10120.3	0.861499	FALSE
Gastrointestinal involvement	MMP-3 T2	24	10	10514.7	3807.68	0.0726009	FALSE
Gastrointestinal involvement	MMP-3 FC	24	10	1.0133	0.538165	0.167719	FALSE
Gastrointestinal involvement	MMP-7 T1	33	14	4558.82	3062.32	0.383029	FALSE
Gastrointestinal involvement	MMP-7 T2	24	10	2899.89	3707.62	0.298618	FALSE
Gastrointestinal involvement	MMP-7 FC	24	10	0.670654	0.863406	0.135448	FALSE
Gastrointestinal involvement	MMP-8 T1	32	14	61348.8	41760.6	0.246934	FALSE
Gastrointestinal involvement	MMP-8 T2	24	10	10216.3	5994.45	0.219303	FALSE
Gastrointestinal involvement	MMP-8 FC	24	10	0.19684	0.251045	0.609875	FALSE
Gastrointestinal involvement	MMP-9 T1	33	14	236983	252863	0.972164	FALSE
Gastrointestinal involvement	MMP-9 T2	24	10	227604	124494	0.108197	FALSE
Gastrointestinal involvement	MMP-9 FC	24	10	0.757528	0.720314	0.583659	FALSE
Gastrointestinal involvement	MMP-10 T1	33	14	798.872	1089.21	0.352107	FALSE
Gastrointestinal involvement	MMP-10 T2	23	10	565.97	465.266	0.468598	FALSE
Gastrointestinal involvement	MMP-10 FC	23	10	0.687507	0.621314	0.739156	FALSE
Gastrointestinal involvement	MMP-12 T1	33	14	60.2851	59.9725	0.90735	FALSE
Gastrointestinal involvement	MMP-12 T2	24	10	62.4408	67.7795	0.363207	FALSE
Gastrointestinal involvement	MMP-12 FC	24	10	1	0.973669	0.353703	FALSE
Gastrointestinal involvement	MMP-13 T1	28	9	981.56	1178.04	0.0792971	FALSE
Gastrointestinal involvement	MMP-13 T2	23	6	810.49	1045.69	0.935603	FALSE
Gastrointestinal involvement	MMP-13 FC	23	6	1.32154	0.760073	0.112191	FALSE
Gastrointestinal involvement	TNF-alpha T1	32	14	37.065	36.41	0.503841	FALSE
Gastrointestinal involvement	TNF-alpha T2	23	10	18.4372	10.5045	0.388715	FALSE
Gastrointestinal involvement	TNF-alpha FC	23	10	0.545129	0.5621	0.829415	FALSE
Gastrointestinal involvement	MMP-1/TIMP-1 T1	33	14	0.004899	0.0069495	0.0150618	TRUE
Gastrointestinal involvement	MMP-1/TIMP-1 T2	24	10	0.022323	0.02084	0.984922	FALSE
Gastrointestinal involvement	MMP-1/TIMP-2 T1	33	14	0.013358	0.0231925	0.0395233	TRUE
Gastrointestinal involvement	MMP-1/TIMP-2 T2	24	9	0.0632125	0.092489	0.384641	FALSE
Gastrointestinal involvement	MMP-1/TIMP-3 T1	33	14	0.032689	0.0321535	0.718426	FALSE
Gastrointestinal involvement	MMP-1/TIMP-3 T2	24	10	0.0673885	0.044067	0.272816	FALSE
Gastrointestinal involvement	MMP-1/TIMP-4 T1	33	14	0.77	1.875	0.0136551	TRUE
Gastrointestinal involvement	MMP-1/TIMP-4 T2	24	10	5.31	7.06	0.984922	FALSE
Gastrointestinal involvement	MMP-2/TIMP-1 T1	33	14	0.82	1.05	0.295083	FALSE
Gastrointestinal involvement	MMP-2/TIMP-1 T2	24	10	0.93	0.93	0.557769	FALSE
Gastrointestinal involvement	MMP-2/TIMP-2 T1	33	14	2.63	2.515	0.907398	FALSE
Gastrointestinal involvement	MMP-2/TIMP-2 T2	24	9	2.735	2.46	0.384721	FALSE
Gastrointestinal involvement	MMP-2/TIMP-3 T1	33	14	5.71	6.62	0.944362	FALSE
Gastrointestinal involvement	MMP-2/TIMP-3 T2	24	10	4.33	4.09	0.508267	FALSE
Gastrointestinal involvement	MMP-2/TIMP-4 T1	33	14	172.57	178.75	0.311585	FALSE
Gastrointestinal involvement	MMP-2/TIMP-4 T2	24	10	192.995	222.795	0.835322	FALSE
Gastrointestinal involvement	MMP-3/TIMP-1 T1	33	14	0.022166	0.023148	0.91663	FALSE
Gastrointestinal involvement	MMP-3/TIMP-1 T2	24	10	0.027286	0.012983	0.0562981	FALSE
Gastrointestinal involvement	MMP-3/TIMP-2 T1	33	14	0.061202	0.075913	0.77119	FALSE
Gastrointestinal involvement	MMP-3/TIMP-2 T2	24	9	0.079479	0.03257	0.101463	FALSE
Gastrointestinal involvement	MMP-3/TIMP-3 T1	33	14	0.14	0.11	0.172894	FALSE
Gastrointestinal involvement	MMP-3/TIMP-3 T2	24	10	0.105	0.0355745	0.0125976	TRUE
Gastrointestinal involvement	MMP-3/TIMP-4 T1	33	14	5	6.375	0.600698	FALSE
Gastrointestinal involvement	MMP-3/TIMP4 T2	24	10	7.475	3.105	0.0515927	FALSE
Gastrointestinal involvement	MMP-7/TIMP-1 T1	33	14	0.010326	0.0107945	0.907404	FALSE
Gastrointestinal involvement	MMP-7/TIMP-1 T2	24	10	0.007663	0.007741	0.776814	FALSE
Gastrointestinal involvement	MMP-7/TIMP-2 T1	33	14	0.030881	0.0288	0.463707	FALSE
Gastrointestinal involvement	MMP-7/TIMP-2 T2	24	9	0.023323	0.025973	0.28408	FALSE
Gastrointestinal involvement	MMP-7/TIMP-3 T1	33	14	0.077191	0.042531	0.0417776	TRUE
Gastrointestinal involvement	MMP-7/TIMP-3 T2	24	10	0.032375	0.025366	0.281391	FALSE
Gastrointestinal involvement	MMP-7/TIMP-4 T1	33	14	2.3	2.49	0.584591	FALSE
Gastrointestinal involvement	MMP-7/TIMP-4 T2	24	10	2.555	2.53	0.864934	FALSE
Gastrointestinal involvement	MMP-8/TIMP-1 T1	33	14	0.11	0.105832	0.916594	FALSE
Gastrointestinal involvement	MMP-8/TIMP-1 T2	24	10	0.029379	0.013869	0.0889486	FALSE
Gastrointestinal involvement	MMP-8/TIMP-2 T1	33	14	0.42	0.35	0.600635	FALSE
Gastrointestinal involvement	MMP-8/TIMP-2 T2	24	9	0.0828755	0.051555	0.384482	FALSE
Gastrointestinal involvement	MMP-8/TIMP-3 T1	33	14	0.81	0.325	0.0395062	TRUE
Gastrointestinal involvement	MMP-8/TIMP-3 T2	24	10	0.096561	0.0464175	0.0126044	TRUE
Gastrointestinal involvement	MMP-8/TIMP-4 T1	33	14	28.35	26.405	0.843258	FALSE
Gastrointestinal involvement	MMP-8/TIMP-4 T2	24	10	9.45	4.075	0.0854561	FALSE
Gastrointestinal involvement	MMP-9/TIMP-1 T1	33	14	0.95	0.75	0.81604	FALSE
Gastrointestinal involvement	MMP-9/TIMP-1 T2	24	10	0.705	0.365	0.0854322	FALSE
Gastrointestinal involvement	MMP-9/TIMP-2 T1	33	14	1.91	2.035	0.990719	FALSE
Gastrointestinal involvement	MMP-9/TIMP-2 T2	24	9	2.315	1.18	0.202832	FALSE
Gastrointestinal involvement	MMP-9/TIMP-3 T1	33	14	3.77	2.845	0.230891	FALSE
Gastrointestinal involvement	MMP-9/TIMP-3 T2	24	10	2.55	1.22	0.00432226	TRUE
Gastrointestinal involvement	MMP-9/TIMP-4 T1	24	10	137.405	113.355	0.636602	FALSE
Gastrointestinal involvement	MMP-9/TIMP-4 T2	24	10	211.745	102.49	0.108197	FALSE
Gastrointestinal involvement	MMP-10/TIMP-1 T1	33	14	0.00278419	0.00290541	0.289861	FALSE
Gastrointestinal involvement	MMP-10/TIMP-1 T2	23	10	0.00153653	0.00143269	0.570029	FALSE
Gastrointestinal involvement	MMP-10/TIMP-2 T1	33	14	0.00717545	0.00834752	0.492567	FALSE
Gastrointestinal involvement	MMP-10/TIMP-2 T2	23	9	0.00436773	0.0037756	0.55735	FALSE
Gastrointestinal involvement	MMP-10/TIMP-3 T1	33	14	0.0126189	0.0102425	0.383029	FALSE
Gastrointestinal involvement	MMP-10/TIMP-3 T2	23	10	0.0069129	0.00316536	0.0627838	FALSE
Gastrointestinal involvement	MMP-10/TIMP-4 T1	33	14	0.4216	0.79875	0.0830909	FALSE
Gastrointestinal involvement	MMP-10/TIMP-4 T2	23	10	0.7137	0.5038	0.68084	FALSE
Gastrointestinal involvement	MMP-12/TIMP-1 T1	33	14	0.000162591	0.000171935	0.666942	FALSE
Gastrointestinal involvement	MMP-12/TIMP-1 T2	24	10	0.000162534	0.000183179	0.55798	FALSE
Gastrointestinal involvement	MMP-12/TIMP-2 T1	33	14	0.000463511	0.000517663	0.771222	FALSE
Gastrointestinal involvement	MMP-12/TIMP-2 T2	24	9	0.000585062	0.000582192	0.530954	FALSE
Gastrointestinal involvement	MMP-12/TIMP-3 T1	33	14	0.000868049	0.000639718	0.0916896	FALSE
Gastrointestinal involvement	MMP-12/TIMP-3 T2	24	10	0.000606631	0.00039395	0.205448	FALSE
Gastrointestinal involvement	MMP-12/TIMP-4 T1	33	14	0.0291285	0.0414292	0.346134	FALSE
Gastrointestinal involvement	MMP-12/TIMP-4 T2	24	10	0.0392391	0.0558295	0.609875	FALSE
Gastrointestinal involvement	MMP-13/TIMP-1 T1	28	9	0.00191732	0.00358365	0.0294749	TRUE
Gastrointestinal involvement	MMP-13/TIMP-1 T2	23	6	0.00271518	0.00280331	0.773012	FALSE
Gastrointestinal involvement	MMP-13/TIMP-2 T1	28	9	0.00601052	0.00784253	0.0860008	FALSE
Gastrointestinal involvement	MMP-13/TIMP-2 T2	23	5	0.00690024	0.00428437	0.600102	FALSE
Gastrointestinal involvement	MMP-13/TIMP-3 T1	28	9	0.0158966	0.0203027	0.330224	FALSE
Gastrointestinal involvement	MMP-13/TIMP-3 T2	23	6	0.0105492	0.0153189	0.979104	FALSE
Gastrointestinal involvement	MMP-13/TIMP-4 T1	28	9	0.39875	0.6791	0.0168725	TRUE
Gastrointestinal involvement	MMP-13/TIMP-4 T2	23	6	1.1031	0.72165	0.483938	FALSE
Elevated troponin and/or NT-pro-BNP	TIMP-1 T1	35	12	357801	292006	0.0619842	FALSE
Elevated troponin and/or NT-pro-BNP	TIMP-1 T2	24	10	380987	284108	0.116752	FALSE
Elevated troponin and/or NT-pro-BNP	TIMP-1 FC	24	10	0.899536	1.03191	0.416434	FALSE
Elevated troponin and/or NT-pro-BNP	TIMP-2 T1	35	12	135115	119737	0.139931	FALSE
Elevated troponin and/or NT-pro-BNP	TIMP-2 T2	24	9	117376	108692	0.731153	FALSE
Elevated troponin and/or NT-pro-BNP	TIMP-2 FC	24	9	0.880095	1.02842	0.188936	FALSE
Elevated troponin and/or NT-pro-BNP	TIMP-3 T1	35	12	62568.1	84974.2	0.171423	FALSE
Elevated troponin and/or NT-pro-BNP	TIMP-3 T2	24	10	91609.6	92829	0.864883	FALSE
Elevated troponin and/or NT-pro-BNP	TIMP-3 FC	24	10	1.39227	1.00034	0.484406	FALSE
Elevated troponin and/or NT-pro-BNP	TIMP-4 T1	35	12	2157.9	1424.34	0.00727731	TRUE
Elevated troponin and/or NT-pro-BNP	TIMP-4 T2	24	10	1554.22	981.154	0.241106	FALSE
Elevated troponin and/or NT-pro-BNP	TIMP-4 FC	24	10	0.730195	0.721638	0.864944	FALSE
Elevated troponin and/or NT-pro-BNP	TIMPT total T1	35	12	631494	555364	0.139931	FALSE
Elevated troponin and/or NT-pro-BNP	TIMP total T2	24	9	591970	630931	0.792746	FALSE
Elevated troponin and/or NT-pro-BNP	TIMP total FC	24	9	0.943629	0.968207	0.700968	FALSE
Elevated troponin and/or NT-pro-BNP	EMMPRIN CD147 T1	35	12	8862.85	7874.01	0.153507	FALSE
Elevated troponin and/or NT-pro-BNP	EMMPRIN CD147 T2	24	10	5521.49	6179.7	0.719546	FALSE
Elevated troponin and/or NT-pro-BNP	EMMPRIN FC	24	10	0.619571	0.805495	0.12583	FALSE
Elevated troponin and/or NT-pro-BNP	MMP-1 T1	35	12	1990.11	1981.58	0.741879	FALSE
Elevated troponin and/or NT-pro-BNP	MMP-1 T2	24	10	8821.44	5712.33	0.298618	FALSE
Elevated troponin and/or NT-pro-BNP	MMP-1 FC	24	10	2.87859	2.68918	0.636602	FALSE
Elevated troponin and/or NT-pro-BNP	MMP-2 T1	35	12	366890	307106	0.236699	FALSE
Elevated troponin and/or NT-pro-BNP	MMP-2 T2	24	10	338146	451260	0.636602	FALSE
Elevated troponin and/or NT-pro-BNP	MMP-2 FC	24	10	0.945819	1.14721	0.0925801	FALSE
Elevated troponin and/or NT-pro-BNP	MMP-3 T1	35	12	9165.51	8894.82	0.93195	FALSE
Elevated troponin and/or NT-pro-BNP	MMP-3 T2	24	10	10765.1	4184.21	0.0394075	TRUE
Elevated troponin and/or NT-pro-BNP	MMP-3 FC	24	10	0.993991	0.779462	0.298618	FALSE
Elevated troponin and/or NT-pro-BNP	MMP-7 T1	35	12	3629.77	3393.11	0.893255	FALSE
Elevated troponin and/or NT-pro-BNP	MMP-7 T2	24	10	2818.43	3877.68	0.0562981	FALSE
Elevated troponin and/or NT-pro-BNP	MMP-7 FC	24	10	0.670654	0.829624	0.179669	FALSE
Elevated troponin and/or NT-pro-BNP	MMP-8 T1	35	11	52127	47596.5	0.856945	FALSE
Elevated troponin and/or NT-pro-BNP	MMP-8 T2	24	10	11390	4138.21	0.0726009	FALSE
Elevated troponin and/or NT-pro-BNP	MMP-8 FC	24	10	0.214887	0.090925	0.116752	FALSE
Elevated troponin and/or NT-pro-BNP	MMP-9 T1	35	12	268600	177518	0.139919	FALSE
Elevated troponin and/or NT-pro-BNP	MMP-9 T2	24	10	245211	107471	0.0394075	TRUE
Elevated troponin and/or NT-pro-BNP	MMP-9 FC	24	10	0.752019	0.656941	0.609875	FALSE
Elevated troponin and/or NT-pro-BNP	MMP-10 T1	35	12	798.872	1089.21	0.241553	FALSE
Elevated troponin and/or NT-pro-BNP	MMP-10 T2	24	9	546.39	591.85	0.585237	FALSE
Elevated troponin and/or NT-pro-BNP	MMP-10 FC	24	9	0.691985	0.542589	0.342147	FALSE
Elevated troponin and/or NT-pro-BNP	MMP-12 T1	35	12	59.66	65.7183	0.471424	FALSE
Elevated troponin and/or NT-pro-BNP	MMP-12 T2	24	10	62.4408	69.7117	0.0633926	FALSE
Elevated troponin and/or NT-pro-BNP	MMP-12 FC	24	10	1	0.973669	0.280655	FALSE
Elevated troponin and/or NT-pro-BNP	MMP-13 T1	29	8	1143.96	664.917	0.229844	FALSE
Elevated troponin and/or NT-pro-BNP	MMP-13 T2	22	7	950.644	641.635	0.153374	FALSE
Elevated troponin and/or NT-pro-BNP	MMP-13 FC	22	7	1.16441	1.22753	0.664831	FALSE
Elevated troponin and/or NT-pro-BNP	TNF-alpha T1	34	12	38.7	24.4299	0.0589268	FALSE
Elevated troponin and/or NT-pro-BNP	TNF-alpha T2	23	10	15.27	15.2415	0.272629	FALSE
Elevated troponin and/or NT-pro-BNP	TNF-alpha FC	23	10	0.545129	0.530134	0.799013	FALSE
Elevated troponin and/or NT-pro-BNP	MMP-1/TIMP-1 T1	35	12	0.005781	0.006641	0.427825	FALSE
Elevated troponin and/or NT-pro-BNP	MMP-1/TIMP-1 T2	24	10	0.0224175	0.015976	0.461104	FALSE
Elevated troponin and/or NT-pro-BNP	MMP-1/TIMP-2 T1	35	12	0.014686	0.0164165	0.912577	FALSE
Elevated troponin and/or NT-pro-BNP	MMP-1/TIMP-2 T2	24	9	0.0703295	0.066984	0.585143	FALSE
Elevated troponin and/or NT-pro-BNP	MMP-1/TIMP-3 T1	35	12	0.035675	0.0176655	0.335196	FALSE
Elevated troponin and/or NT-pro-BNP	MMP-1/TIMP-3 T2	24	10	0.0923945	0.0451815	0.145439	FALSE
Elevated troponin and/or NT-pro-BNP	MMP-1/TIMP-4 T1	35	12	0.95	1.64	0.32903	FALSE
Elevated troponin and/or NT-pro-BNP	MMP-1/TIMP-4 T2	24	10	5.645	4.43	0.748006	FALSE
Elevated troponin and/or NT-pro-BNP	MMP-2/TIMP-1 T1	35	12	0.95	0.875	0.660476	FALSE
Elevated troponin and/or NT-pro-BNP	MMP-2/TIMP-1 T2	24	10	0.85	1.07	0.27278	FALSE
Elevated troponin and/or NT-pro-BNP	MMP-2/TIMP-2 T1	35	12	2.63	2.49	0.54998	FALSE
Elevated troponin and/or NT-pro-BNP	MMP-2/TIMP-2 T2	24	9	2.665	2.88	0.855636	FALSE
Elevated troponin and/or NT-pro-BNP	MMP-2/TIMP-3 T1	35	12	6.02	5.245	0.347561	FALSE
Elevated troponin and/or NT-pro-BNP	MMP-2/TIMP-3 T2	24	10	4.055	4.53	0.879811	FALSE
Elevated troponin and/or NT-pro-BNP	MMP-2/TIMP-4 T1	35	12	172.32	204.96	0.373193	FALSE
Elevated troponin and/or NT-pro-BNP	MMP-2/TIMP-4 T2	24	10	192.535	298.035	0.719546	FALSE
Elevated troponin and/or NT-pro-BNP	MMP-3/TIMP-1 T1	35	12	0.021069	0.0270135	0.399948	FALSE
Elevated troponin and/or NT-pro-BNP	MMP-3/TIMP-1 T2	24	10	0.028258	0.015274	0.108197	FALSE
Elevated troponin and/or NT-pro-BNP	MMP-3/TIMP-2 T1	35	12	0.061202	0.068926	0.816686	FALSE
Elevated troponin and/or NT-pro-BNP	MMP-3/TIMP-2 T2	24	9	0.079479	0.03257	0.045311	TRUE
Elevated troponin and/or NT-pro-BNP	MMP-3/TIMP-3 T1	35	12	0.13	0.115	0.54939	FALSE
Elevated troponin and/or NT-pro-BNP	MMP-3/TIMP-3 T2	24	10	0.11	0.052824	0.0270061	TRUE
Elevated troponin and/or NT-pro-BNP	MMP-3/TIMP-4 T1	35	12	5	7.6	0.146599	FALSE
Elevated troponin and/or NT-pro-BNP	MMP-3/TIMP4 T2	24	10	6.75	2.925	0.145624	FALSE
Elevated troponin and/or NT-pro-BNP	MMP-7/TIMP-1 T1	35	12	0.009599	0.012345	0.06727	FALSE
Elevated troponin and/or NT-pro-BNP	MMP-7/TIMP-1 T2	24	10	0.0070555	0.0114115	0.0297581	TRUE
Elevated troponin and/or NT-pro-BNP	MMP-7/TIMP-2 T1	35	12	0.028502	0.0334275	0.360241	FALSE
Elevated troponin and/or NT-pro-BNP	MMP-7/TIMP-2 T2	24	9	0.023323	0.024553	0.217617	FALSE
Elevated troponin and/or NT-pro-BNP	MMP-7/TIMP-3 T1	35	12	0.072065	0.0587215	0.68723	FALSE
Elevated troponin and/or NT-pro-BNP	MMP-7/TIMP-3 T2	24	10	0.0302895	0.0325825	1	FALSE
Elevated troponin and/or NT-pro-BNP	MMP-7/TIMP-4 T1	35	12	1.94	2.97	0.0554524	FALSE
Elevated troponin and/or NT-pro-BNP	MMP-7/TIMP-4 T2	24	10	2.165	4.285	0.0756392	FALSE
Elevated troponin and/or NT-pro-BNP	MMP-8/TIMP-1 T1	35	12	0.1	0.145	0.642824	FALSE
Elevated troponin and/or NT-pro-BNP	MMP-8/TIMP-1 T2	24	10	0.029379	0.0096185	0.0962783	FALSE
Elevated troponin and/or NT-pro-BNP	MMP-8/TIMP-2 T1	35	12	0.41	0.39	0.835686	FALSE
Elevated troponin and/or NT-pro-BNP	MMP-8/TIMP-2 T2	24	9	0.0828755	0.038182	0.110096	FALSE
Elevated troponin and/or NT-pro-BNP	MMP-8/TIMP-3 T1	35	12	0.58	0.52	0.486811	FALSE
Elevated troponin and/or NT-pro-BNP	MMP-8/TIMP-3 T2	24	10	0.09506	0.0444385	0.0181542	TRUE
Elevated troponin and/or NT-pro-BNP	MMP-8/TIMP-4 T1	35	12	27.24	35.675	0.347575	FALSE
Elevated troponin and/or NT-pro-BNP	MMP-8/TIMP-4 T2	24	10	8.21	5.525	0.316497	FALSE
Elevated troponin and/or NT-pro-BNP	MMP-9/TIMP-1 T1	35	12	0.81	0.97	0.922251	FALSE
Elevated troponin and/or NT-pro-BNP	MMP-9/TIMP-1 T2	24	10	0.725	0.425	0.192173	FALSE
Elevated troponin and/or NT-pro-BNP	MMP-9/TIMP-2 T1	35	12	2.31	1.67	0.449403	FALSE
Elevated troponin and/or NT-pro-BNP	MMP-9/TIMP-2 T2	24	9	2.49	1.21	0.0973975	FALSE
Elevated troponin and/or NT-pro-BNP	MMP-9/TIMP-3 T1	35	12	3.73	2.395	0.335168	FALSE
Elevated troponin and/or NT-pro-BNP	MMP-9/TIMP-3 T2	24	10	2.55	1.515	0.0394075	TRUE
Elevated troponin and/or NT-pro-BNP	MMP-9/TIMP-4 T1	24	10	127.17	123.85	0.532863	FALSE
Elevated troponin and/or NT-pro-BNP	MMP-9/TIMP-4 T2	24	10	198.73	103.67	0.298618	FALSE
Elevated troponin and/or NT-pro-BNP	MMP-10/TIMP-1 T1	35	12	0.00276312	0.00382282	0.0654735	FALSE
Elevated troponin and/or NT-pro-BNP	MMP-10/TIMP-1 T2	24	9	0.00132059	0.00173193	0.504789	FALSE
Elevated troponin and/or NT-pro-BNP	MMP-10/TIMP-2 T1	35	12	0.00759441	0.00854787	0.115571	FALSE
Elevated troponin and/or NT-pro-BNP	MMP-10/TIMP-2 T2	24	8	0.00413741	0.00513066	0.716882	FALSE
Elevated troponin and/or NT-pro-BNP	MMP-10/TIMP-3 T1	35	12	0.0105125	0.0135857	0.93195	FALSE
Elevated troponin and/or NT-pro-BNP	MMP-10/TIMP-3 T2	24	9	0.00631266	0.00482375	0.363082	FALSE
Elevated troponin and/or NT-pro-BNP	MMP-10/TIMP-4 T1	35	12	0.3909	0.9848	0.0198082	TRUE
Elevated troponin and/or NT-pro-BNP	MMP-10/TIMP-4 T2	24	9	0.4624	0.7247	0.430556	FALSE
Elevated troponin and/or NT-pro-BNP	MMP-12/TIMP-1 T1	35	12	0.000160783	0.000195635	0.121324	FALSE
Elevated troponin and/or NT-pro-BNP	MMP-12/TIMP-1 T2	24	10	0.000155326	0.000227933	0.100146	FALSE
Elevated troponin and/or NT-pro-BNP	MMP-12/TIMP-2 T1	35	12	0.000463511	0.000630139	0.246505	FALSE
Elevated troponin and/or NT-pro-BNP	MMP-12/TIMP-2 T2	24	9	0.000573586	0.000650503	0.119644	FALSE
Elevated troponin and/or NT-pro-BNP	MMP-12/TIMP-3 T1	35	12	0.000861363	0.000619713	0.634242	FALSE
Elevated troponin and/or NT-pro-BNP	MMP-12/TIMP-3 T2	24	10	0.000523332	0.000588837	0.894757	FALSE
Elevated troponin and/or NT-pro-BNP	MMP-12/TIMP-4 T1	35	12	0.0285418	0.0406907	0.115571	FALSE
Elevated troponin and/or NT-pro-BNP	MMP-12/TIMP-4 T2	24	10	0.0389771	0.0748821	0.116752	FALSE
Elevated troponin and/or NT-pro-BNP	MMP-13/TIMP-1 T1	29	8	0.00238056	0.00210427	0.574441	FALSE
Elevated troponin and/or NT-pro-BNP	MMP-13/TIMP-1 T2	22	7	0.00293776	0.00124973	0.217238	FALSE
Elevated troponin and/or NT-pro-BNP	MMP-13/TIMP-2 T1	29	8	0.00682327	0.00437756	0.282505	FALSE
Elevated troponin and/or NT-pro-BNP	MMP-13/TIMP-2 T2	22	6	0.00807746	0.0037738	0.0447577	TRUE
Elevated troponin and/or NT-pro-BNP	MMP-13/TIMP-3 T1	29	8	0.0187466	0.0150314	0.657906	FALSE
Elevated troponin and/or NT-pro-BNP	MMP-13/TIMP-3 T2	22	7	0.0165334	0.00490478	0.121919	FALSE
Elevated troponin and/or NT-pro-BNP	MMP-13/TIMP-4 T1	29	8	0.4373	0.5088	0.956753	FALSE
Elevated troponin and/or NT-pro-BNP	MMP-13/TIMP-4 T2	22	7	0.7271	0.7551	0.524035	FALSE
Decreased LV contractility	TIMP-1 T1	18	29	369341	319217	0.117645	FALSE
Decreased LV contractility	TIMP-1 T2	12	22	372993	368992	0.786944	FALSE
Decreased LV contractility	TIMP-1 FC	12	22	0.811783	0.988967	0.101066	FALSE
Decreased LV contractility	TIMP-2 T1	18	29	145586	129663	0.39948	FALSE
Decreased LV contractility	TIMP-2 T2	12	21	115398	121631	0.512519	FALSE
Decreased LV contractility	TIMP-2 FC	12	21	0.880095	0.994119	0.238455	FALSE
Decreased LV contractility	TIMP-3 T1	18	29	61795.1	73229.6	0.303193	FALSE
Decreased LV contractility	TIMP-3 T2	12	22	89062	92829	0.427668	FALSE
Decreased LV contractility	TIMP-3 FC	12	22	1.26804	1.33614	0.732083	FALSE
Decreased LV contractility	TIMP-4 T1	18	29	2264.37	1591.11	0.0235024	TRUE
Decreased LV contractility	TIMP-4 T2	12	22	1298.98	1489.63	0.377061	FALSE
Decreased LV contractility	TIMP-4 FC	12	22	0.606607	0.767173	0.0417384	TRUE
Decreased LV contractility	TIMPT total T1	18	29	716163	586668	0.178338	FALSE
Decreased LV contractility	TIMP total T2	12	21	573425	630931	0.139341	FALSE
Decreased LV contractility	TIMP total FC	12	21	0.917385	0.968207	0.171946	FALSE
Decreased LV contractility	EMMPRIN CD147 T1	18	29	8233.4	9467.97	0.734453	FALSE
Decreased LV contractility	EMMPRIN CD147 T2	12	22	4637.39	6135.42	0.601292	FALSE
Decreased LV contractility	EMMPRIN FC	12	22	0.586415	0.745317	0.188386	FALSE
Decreased LV contractility	MMP-1 T1	18	29	1768.48	2159.55	0.341111	FALSE
Decreased LV contractility	MMP-1 T2	12	22	5575.6	8823.15	0.460047	FALSE
Decreased LV contractility	MMP-1 FC	12	22	2.84794	2.76552	0.842884	FALSE
Decreased LV contractility	MMP-2 T1	18	29	361847	348333	0.921551	FALSE
Decreased LV contractility	MMP-2 T2	12	22	328569	394041	0.95689	FALSE
Decreased LV contractility	MMP-2 FC	12	22	0.953526	0.995109	0.759362	FALSE
Decreased LV contractility	MMP-3 T1	18	29	8603.53	9063.35	0.701737	FALSE
Decreased LV contractility	MMP-3 T2	12	22	10753.4	5678	0.271705	FALSE
Decreased LV contractility	MMP-3 FC	12	22	1.0133	0.955654	0.552098	FALSE
Decreased LV contractility	MMP-7 T1	18	29	4500.8	3228.16	0.375446	FALSE
Decreased LV contractility	MMP-7 T2	12	22	2975.6	3049.26	0.397061	FALSE
Decreased LV contractility	MMP-7 FC	12	22	0.646884	0.807688	0.256299	FALSE
Decreased LV contractility	MMP-8 T1	18	28	78470.6	41921.8	0.0146038	TRUE
Decreased LV contractility	MMP-8 T2	12	22	18335	6868.51	0.0454915	TRUE
Decreased LV contractility	MMP-8 FC	12	22	0.204779	0.19241	0.438454	FALSE
Decreased LV contractility	MMP-9 T1	18	29	252863	228810	0.330114	FALSE
Decreased LV contractility	MMP-9 T2	12	22	266997	177805	0.074447	FALSE
Decreased LV contractility	MMP-9 FC	12	22	0.730897	0.745538	0.552098	FALSE
Decreased LV contractility	MMP-10 T1	18	29	1022.02	824.249	1	FALSE
Decreased LV contractility	MMP-10 T2	12	21	546.39	565.97	0.98507	FALSE
Decreased LV contractility	MMP-10 FC	12	21	0.676109	0.685931	1	FALSE
Decreased LV contractility	MMP-12 T1	18	29	60.2851	59.66	0.669376	FALSE
Decreased LV contractility	MMP-12 T2	12	22	65.6366	66.84	0.527286	FALSE
Decreased LV contractility	MMP-12 FC	12	22	0.928943	1	0.396339	FALSE
Decreased LV contractility	MMP-13 T1	15	22	981.56	1143.96	0.675794	FALSE
Decreased LV contractility	MMP-13 T2	11	18	810.49	906.763	0.620842	FALSE
Decreased LV contractility	MMP-13 FC	11	18	0.825716	1.29442	0.543947	FALSE
Decreased LV contractility	TNF-alpha T1	17	29	37.93	36.2	0.393426	FALSE
Decreased LV contractility	TNF-alpha T2	11	22	15.0902	16.235	0.688379	FALSE
Decreased LV contractility	TNF-alpha FC	11	22	0.582631	0.45739	0.293622	FALSE
Decreased LV contractility	MMP-1/TIMP-1 T1	18	29	0.0045475	0.006903	0.0366213	TRUE
Decreased LV contractility	MMP-1/TIMP-1 T2	12	22	0.022323	0.02084	0.871173	FALSE
Decreased LV contractility	MMP-1/TIMP-2 T1	18	29	0.0128585	0.014993	0.250584	FALSE
Decreased LV contractility	MMP-1/TIMP-2 T2	12	21	0.0511275	0.075568	0.465382	FALSE
Decreased LV contractility	MMP-1/TIMP-3 T1	18	29	0.034182	0.028363	0.869626	FALSE
Decreased LV contractility	MMP-1/TIMP-3 T2	12	22	0.051835	0.0673885	0.92818	FALSE
Decreased LV contractility	MMP-1/TIMP-4 T1	18	29	0.71	1.62	0.0709532	FALSE
Decreased LV contractility	MMP-1/TIMP-4 T2	12	22	7.865	5.31	0.552098	FALSE
Decreased LV contractility	MMP-2/TIMP-1 T1	18	29	0.79	1.01	0.115016	FALSE
Decreased LV contractility	MMP-2/TIMP-1 T2	12	22	0.84	0.985	0.899575	FALSE
Decreased LV contractility	MMP-2/TIMP-2 T1	18	29	2.4	2.65	0.532785	FALSE
Decreased LV contractility	MMP-2/TIMP-2 T2	12	21	2.8	2.57	0.35912	FALSE
Decreased LV contractility	MMP-2/TIMP-3 T1	18	29	6.79	5.71	0.335577	FALSE
Decreased LV contractility	MMP-2/TIMP-3 T2	12	22	3.805	4.33	0.828787	FALSE
Decreased LV contractility	MMP-2/TIMP-4 T1	18	29	141.875	190.64	0.158084	FALSE
Decreased LV contractility	MMP-2/TIMP-4 T2	12	22	309.63	192.535	0.287734	FALSE
Decreased LV contractility	MMP-3/TIMP-1 T1	18	29	0.0196675	0.024753	0.622437	FALSE
Decreased LV contractility	MMP-3/TIMP-1 T2	12	22	0.030399	0.0172435	0.086937	FALSE
Decreased LV contractility	MMP-3/TIMP-2 T1	18	29	0.059465	0.070423	0.701696	FALSE
Decreased LV contractility	MMP-3/TIMP-2 T2	12	21	0.084159	0.055596	0.16597	FALSE
Decreased LV contractility	MMP-3/TIMP-3 T1	18	29	0.175	0.11	0.117072	FALSE
Decreased LV contractility	MMP-3/TIMP-3 T2	12	22	0.125	0.074125	0.0973219	FALSE
Decreased LV contractility	MMP-3/TIMP-4 T1	18	29	3.86	5.93	0.518545	FALSE
Decreased LV contractility	MMP-3/TIMP4 T2	12	22	8.81	3.515	0.0243006	TRUE
Decreased LV contractility	MMP-7/TIMP-1 T1	18	29	0.009866	0.01125	0.241659	FALSE
Decreased LV contractility	MMP-7/TIMP-1 T2	12	22	0.007718	0.00752	0.95689	FALSE
Decreased LV contractility	MMP-7/TIMP-2 T1	18	29	0.0302795	0.030598	0.938945	FALSE
Decreased LV contractility	MMP-7/TIMP-2 T2	12	21	0.024218	0.023268	1	FALSE
Decreased LV contractility	MMP-7/TIMP-3 T1	18	29	0.0849745	0.052543	0.228661	FALSE
Decreased LV contractility	MMP-7/TIMP-3 T2	12	22	0.0327285	0.028137	0.732083	FALSE
Decreased LV contractility	MMP-7/TIMP-4 T1	18	29	1.73	2.66	0.196615	FALSE
Decreased LV contractility	MMP-7/TIMP-4 T2	12	22	2.815	2.35	0.41742	FALSE
Decreased LV contractility	MMP-8/TIMP-1 T1	18	29	0.11	0.11	0.171197	FALSE
Decreased LV contractility	MMP-8/TIMP-1 T2	12	22	0.054093	0.018062	0.0173759	TRUE
Decreased LV contractility	MMP-8/TIMP-2 T1	18	29	0.47	0.39	0.0628152	FALSE
Decreased LV contractility	MMP-8/TIMP-2 T2	12	21	0.14	0.072387	0.0343555	TRUE
Decreased LV contractility	MMP-8/TIMP-3 T1	18	29	1.14	0.44	0.0234984	TRUE
Decreased LV contractility	MMP-8/TIMP-3 T2	12	22	0.195	0.0600465	0.0191491	TRUE
Decreased LV contractility	MMP-8/TIMP-4 T1	18	29	28.935	28.35	0.319376	FALSE
Decreased LV contractility	MMP-8/TIMP-4 T2	12	22	16.72	4.825	0.00261798	TRUE
Decreased LV contractility	MMP-9/TIMP-1 T1	18	29	0.815	0.95	1	FALSE
Decreased LV contractility	MMP-9/TIMP-1 T2	12	22	1.215	0.435	0.0474384	TRUE
Decreased LV contractility	MMP-9/TIMP-2 T1	18	29	2.035	1.91	0.607012	FALSE
Decreased LV contractility	MMP-9/TIMP-2 T2	12	21	2.565	1.57	0.0817696	FALSE
Decreased LV contractility	MMP-9/TIMP-3 T1	18	29	3.925	3.06	0.540009	FALSE
Decreased LV contractility	MMP-9/TIMP-3 T2	12	22	3.88	1.515	0.0243006	TRUE
Decreased LV contractility	MMP-9/TIMP-4 T1	12	22	149.245	113.355	0.32167	FALSE
Decreased LV contractility	MMP-9/TIMP-4 T2	12	22	388.005	113	0.0149937	TRUE
Decreased LV contractility	MMP-10/TIMP-1 T1	18	29	0.00289415	0.00276312	0.411837	FALSE
Decreased LV contractility	MMP-10/TIMP-1 T2	12	21	0.00169757	0.00148098	0.694354	FALSE
Decreased LV contractility	MMP-10/TIMP-2 T1	18	29	0.00841477	0.00676775	0.99127	FALSE
Decreased LV contractility	MMP-10/TIMP-2 T2	12	20	0.00526104	0.00413741	0.770335	FALSE
Decreased LV contractility	MMP-10/TIMP-3 T1	18	29	0.021308	0.0101454	0.576809	FALSE
Decreased LV contractility	MMP-10/TIMP-3 T2	12	21	0.00649929	0.00596983	0.399765	FALSE
Decreased LV contractility	MMP-10/TIMP-4 T1	18	29	0.3888	0.6403	0.192875	FALSE
Decreased LV contractility	MMP-10/TIMP-4 T2	12	21	0.7213	0.4881	0.442967	FALSE
Decreased LV contractility	MMP-12/TIMP-1 T1	18	29	0.000164018	0.000167344	0.938945	FALSE
Decreased LV contractility	MMP-12/TIMP-1 T2	12	22	0.000186405	0.000157333	0.842884	FALSE
Decreased LV contractility	MMP-12/TIMP-2 T1	18	29	0.000530666	0.000463511	0.424418	FALSE
Decreased LV contractility	MMP-12/TIMP-2 T2	12	21	0.000585062	0.000564981	0.639927	FALSE
Decreased LV contractility	MMP-12/TIMP-3 T1	18	29	0.000965746	0.000735963	0.0962598	FALSE
Decreased LV contractility	MMP-12/TIMP-3 T2	12	22	0.000569318	0.000531819	0.438454	FALSE
Decreased LV contractility	MMP-12/TIMP-4 T1	18	29	0.0256689	0.0390777	0.504469	FALSE
Decreased LV contractility	MMP-12/TIMP-4 T2	12	22	0.0512077	0.0466749	0.504968	FALSE
Decreased LV contractility	MMP-13/TIMP-1 T1	15	22	0.00210373	0.00316424	0.329841	FALSE
Decreased LV contractility	MMP-13/TIMP-1 T2	11	18	0.00282949	0.00242756	1	FALSE
Decreased LV contractility	MMP-13/TIMP-2 T1	15	22	0.00647423	0.00728646	0.525979	FALSE
Decreased LV contractility	MMP-13/TIMP-2 T2	11	17	0.00623845	0.00690024	0.706677	FALSE
Decreased LV contractility	MMP-13/TIMP-3 T1	15	22	0.0170585	0.0197346	0.768812	FALSE
Decreased LV contractility	MMP-13/TIMP-3 T2	11	18	0.0139958	0.00948831	0.770169	FALSE
Decreased LV contractility	MMP-13/TIMP-4 T1	15	22	0.3407	0.48275	0.27213	FALSE
Decreased LV contractility	MMP-13/TIMP-4 T2	11	18	0.7271	0.73565	0.333808	FALSE
Pericardial effusion	TIMP-1 T1	10	37	477910	333546	0.0229387	TRUE
Pericardial effusion	TIMP-1 T2	8	26	430322	355893	0.0220319	TRUE
Pericardial effusion	TIMP-1 FC	8	26	0.922431	0.939356	0.646929	FALSE
Pericardial effusion	TIMP-2 T1	10	37	144990	127354	0.236922	FALSE
Pericardial effusion	TIMP-2 T2	8	25	119174	115517	0.549776	FALSE
Pericardial effusion	TIMP-2 FC	8	25	0.808218	0.978482	0.373769	FALSE
Pericardial effusion	TIMP-3 T1	10	37	83986.7	62568.1	0.131256	FALSE
Pericardial effusion	TIMP-3 T2	8	26	135287	86009.6	0.0488386	TRUE
Pericardial effusion	TIMP-3 FC	8	26	1.43156	1.33261	0.46021	FALSE
Pericardial effusion	TIMP-4 T1	10	37	2021.29	2008.97	0.541273	FALSE
Pericardial effusion	TIMP-4 T2	8	26	1571.28	1337.27	0.272773	FALSE
Pericardial effusion	TIMP-4 FC	8	26	0.810862	0.728644	0.46021	FALSE
Pericardial effusion	TIMPT total T1	10	37	850420	577234	0.0280581	TRUE
Pericardial effusion	TIMP total T2	8	25	714279	577795	0.0547654	FALSE
Pericardial effusion	TIMP total FC	8	25	0.944613	0.953517	0.820894	FALSE
Pericardial effusion	EMMPRIN CD147 T1	10	37	12556.7	8251.55	0.00660065	TRUE
Pericardial effusion	EMMPRIN CD147 T2	8	26	5066.88	6135.42	0.484985	FALSE
Pericardial effusion	EMMPRIN FC	8	26	0.366811	0.805184	0.000807658	TRUE
Pericardial effusion	MMP-1 T1	10	37	4264.55	1866.85	0.00899161	TRUE
Pericardial effusion	MMP-1 T2	8	26	10757.4	7661.87	0.412768	FALSE
Pericardial effusion	MMP-1 FC	8	26	2.59957	2.91063	0.795909	FALSE
Pericardial effusion	MMP-2 T1	10	37	466784	335225	0.0749823	FALSE
Pericardial effusion	MMP-2 T2	8	26	432463	338146	0.563261	FALSE
Pericardial effusion	MMP-2 FC	8	26	0.865308	1.03164	0.0474723	TRUE
Pericardial effusion	MMP-3 T1	10	37	15261	6719.09	0.00121123	TRUE
Pericardial effusion	MMP-3 T2	8	26	10375	6240.04	0.484985	FALSE
Pericardial effusion	MMP-3 FC	8	26	0.798132	1.18966	0.0385441	TRUE
Pericardial effusion	MMP-7 T1	10	37	5329.31	3530.44	0.369834	FALSE
Pericardial effusion	MMP-7 T2	8	26	3292.32	2926.44	0.889273	FALSE
Pericardial effusion	MMP-7 FC	8	26	0.630216	0.75109	0.326704	FALSE
Pericardial effusion	MMP-8 T1	9	37	64480	47244	0.718872	FALSE
Pericardial effusion	MMP-8 T2	8	26	13043.9	7306.62	0.220402	FALSE
Pericardial effusion	MMP-8 FC	8	26	0.230461	0.19684	0.205327	FALSE
Pericardial effusion	MMP-9 T1	10	37	195314	363949	0.0838744	FALSE
Pericardial effusion	MMP-9 T2	8	26	229205	215395	0.536535	FALSE
Pericardial effusion	MMP-9 FC	8	26	0.913198	0.630311	0.0702678	FALSE
Pericardial effusion	MMP-10 T1	10	37	794.981	917.52	0.968897	FALSE
Pericardial effusion	MMP-10 T2	8	25	491.245	565.97	0.36639	FALSE
Pericardial effusion	MMP-10 FC	8	25	0.677901	0.685931	0.577756	FALSE
Pericardial effusion	MMP-12 T1	10	37	74.3145	59.66	0.0386626	TRUE
Pericardial effusion	MMP-12 T2	8	26	68.7189	63.9583	0.541567	FALSE
Pericardial effusion	MMP-12 FC	8	26	0.842245	1	0.281237	FALSE
Pericardial effusion	MMP-13 T1	8	29	909.319	1143.96	0.911744	FALSE
Pericardial effusion	MMP-13 T2	7	22	805.377	858.972	1	FALSE
Pericardial effusion	MMP-13 FC	7	22	0.781738	1.24742	0.740409	FALSE
Pericardial effusion	TNF-alpha T1	10	36	36.7309	37.065	0.575976	FALSE
Pericardial effusion	TNF-alpha T2	7	26	8.96334	16.8536	0.537487	FALSE
Pericardial effusion	TNF-alpha FC	7	26	0.285528	0.61848	0.0159141	TRUE
Pericardial effusion	MMP-1/TIMP-1 T1	10	37	0.006512	0.005782	0.427889	FALSE
Pericardial effusion	MMP-1/TIMP-1 T2	8	26	0.0188775	0.022323	0.889273	FALSE
Pericardial effusion	MMP-1/TIMP-2 T1	10	37	0.0212625	0.013082	0.0439553	TRUE
Pericardial effusion	MMP-1/TIMP-2 T2	8	25	0.0790855	0.066984	0.628912	FALSE
Pericardial effusion	MMP-1/TIMP-3 T1	10	37	0.044937	0.031347	0.247386	FALSE
Pericardial effusion	MMP-1/TIMP-3 T2	8	26	0.0730695	0.0626925	0.776158	FALSE
Pericardial effusion	MMP-1/TIMP-4 T1	10	37	1.995	0.99	0.0481697	TRUE
Pericardial effusion	MMP-1/TIMP-4 T2	8	26	3.965	6.275	0.618489	FALSE
Pericardial effusion	MMP-2/TIMP-1 T1	10	37	1.02	0.83	0.958529	FALSE
Pericardial effusion	MMP-2/TIMP-1 T2	8	26	0.86	0.935	0.515727	FALSE
Pericardial effusion	MMP-2/TIMP-2 T1	10	37	3.265	2.62	0.176442	FALSE
Pericardial effusion	MMP-2/TIMP-2 T2	8	25	3.19	2.69	0.784776	FALSE
Pericardial effusion	MMP-2/TIMP-3 T1	10	37	6.395	5.85	0.764988	FALSE
Pericardial effusion	MMP-2/TIMP-3 T2	8	26	3.49	4.43	0.39381	FALSE
Pericardial effusion	MMP-2/TIMP-4 T1	10	37	234.83	172.32	0.558642	FALSE
Pericardial effusion	MMP-2/TIMP-4 T2	8	26	245.875	193.78	0.563261	FALSE
Pericardial effusion	MMP-3/TIMP-1 T1	10	37	0.029039	0.021644	0.189289	FALSE
Pericardial effusion	MMP-3/TIMP-1 T2	8	26	0.0231995	0.022781	0.952426	FALSE
Pericardial effusion	MMP-3/TIMP-2 T1	10	37	0.096383	0.051872	0.00317036	TRUE
Pericardial effusion	MMP-3/TIMP-2 T2	8	25	0.084872	0.060161	0.643877	FALSE
Pericardial effusion	MMP-3/TIMP-3 T1	10	37	0.17	0.11	0.127755	FALSE
Pericardial effusion	MMP-3/TIMP-3 T2	8	26	0.074125	0.085038	0.669843	FALSE
Pericardial effusion	MMP-3/TIMP-4 T1	10	37	8.835	5	0.012128	TRUE
Pericardial effusion	MMP-3/TIMP4 T2	8	26	4.32	6.015	0.484985	FALSE
Pericardial effusion	MMP-7/TIMP-1 T1	10	37	0.009029	0.01087	0.316929	FALSE
Pericardial effusion	MMP-7/TIMP-1 T2	8	26	0.0070065	0.007864	0.46021	FALSE
Pericardial effusion	MMP-7/TIMP-2 T1	10	37	0.0297755	0.030598	0.74524	FALSE
Pericardial effusion	MMP-7/TIMP-2 T2	8	25	0.0270535	0.023378	0.757464	FALSE
Pericardial effusion	MMP-7/TIMP-3 T1	10	37	0.06366	0.0649	0.927499	FALSE
Pericardial effusion	MMP-7/TIMP-3 T2	8	26	0.0258535	0.033788	0.177359	FALSE
Pericardial effusion	MMP-7/TIMP-4 T1	10	37	2.465	2.33	0.865821	FALSE
Pericardial effusion	MMP-7/TIMP-4 T2	8	26	2.555	2.59	0.339997	FALSE
Pericardial effusion	MMP-8/TIMP-1 T1	10	37	0.085852	0.14	0.0986732	FALSE
Pericardial effusion	MMP-8/TIMP-1 T2	8	26	0.0240615	0.025102	0.51592	FALSE
Pericardial effusion	MMP-8/TIMP-2 T1	10	37	0.35	0.41	0.376728	FALSE
Pericardial effusion	MMP-8/TIMP-2 T2	8	25	0.0951715	0.072387	0.366109	FALSE
Pericardial effusion	MMP-8/TIMP-3 T1	10	37	0.47	0.64	0.603119	FALSE
Pericardial effusion	MMP-8/TIMP-3 T2	8	26	0.0892535	0.0908795	0.90305	FALSE
Pericardial effusion	MMP-8/TIMP-4 T1	10	37	30.875	27.24	0.825134	FALSE
Pericardial effusion	MMP-8/TIMP-4 T2	8	26	6.415	8.865	0.73	FALSE
Pericardial effusion	MMP-9/TIMP-1 T1	10	37	0.58	0.99	0.0481891	TRUE
Pericardial effusion	MMP-9/TIMP-1 T2	8	26	0.635	0.61	1	FALSE
Pericardial effusion	MMP-9/TIMP-2 T1	10	37	1.52	3.06	0.141882	FALSE
Pericardial effusion	MMP-9/TIMP-2 T2	8	25	2.195	2.28	0.768675	FALSE
Pericardial effusion	MMP-9/TIMP-3 T1	10	37	2.255	3.73	0.0594762	FALSE
Pericardial effusion	MMP-9/TIMP-3 T2	8	26	1.58	2.16	0.536535	FALSE
Pericardial effusion	MMP-9/TIMP-4 T1	8	26	126.91	124.335	0.795909	FALSE
Pericardial effusion	MMP-9/TIMP-4 T2	8	26	123.42	190.97	0.618489	FALSE
Pericardial effusion	MMP-10/TIMP-1 T1	10	37	0.00185407	0.00303349	0.207418	FALSE
Pericardial effusion	MMP-10/TIMP-1 T2	8	25	0.00114082	0.00159823	0.253606	FALSE
Pericardial effusion	MMP-10/TIMP-2 T1	10	37	0.00684764	0.00767176	0.61224	FALSE
Pericardial effusion	MMP-10/TIMP-2 T2	8	24	0.00379423	0.004737	0.292711	FALSE
Pericardial effusion	MMP-10/TIMP-3 T1	10	37	0.00935639	0.0145525	0.490927	FALSE
Pericardial effusion	MMP-10/TIMP-3 T2	8	25	0.00319467	0.00650369	0.138102	FALSE
Pericardial effusion	MMP-10/TIMP-4 T1	10	37	0.4392	0.4782	0.968898	FALSE
Pericardial effusion	MMP-10/TIMP-4 T2	8	25	0.38415	0.6431	0.175689	FALSE
Pericardial effusion	MMP-12/TIMP-1 T1	10	37	0.000173824	0.000162591	0.61224	FALSE
Pericardial effusion	MMP-12/TIMP-1 T2	8	26	0.000155326	0.000185771	0.510431	FALSE
Pericardial effusion	MMP-12/TIMP-2 T1	10	37	0.000580482	0.000471898	0.115806	FALSE
Pericardial effusion	MMP-12/TIMP-2 T2	8	25	0.000574818	0.00058547	0.726297	FALSE
Pericardial effusion	MMP-12/TIMP-3 T1	10	37	0.000854593	0.000828299	0.667989	FALSE
Pericardial effusion	MMP-12/TIMP-3 T2	8	26	0.000461521	0.000606631	0.307082	FALSE
Pericardial effusion	MMP-12/TIMP-4 T1	10	37	0.0431062	0.0291285	0.198202	FALSE
Pericardial effusion	MMP-12/TIMP-4 T2	8	26	0.0450822	0.0488428	0.436135	FALSE
Pericardial effusion	MMP-13/TIMP-1 T1	8	29	0.00138597	0.00284634	0.137274	FALSE
Pericardial effusion	MMP-13/TIMP-1 T2	7	22	0.00271518	0.00259982	0.822716	FALSE
Pericardial effusion	MMP-13/TIMP-2 T1	8	29	0.00561639	0.00682327	0.435151	FALSE
Pericardial effusion	MMP-13/TIMP-2 T2	7	21	0.00690024	0.0065874	1	FALSE
Pericardial effusion	MMP-13/TIMP-3 T1	8	29	0.0130944	0.0191665	0.310219	FALSE
Pericardial effusion	MMP-13/TIMP-3 T2	7	22	0.0105492	0.0137049	0.438308	FALSE
Pericardial effusion	MMP-13/TIMP-4 T1	8	29	0.50575	0.4264	0.786182	FALSE
Pericardial effusion	MMP-13/TIMP-4 T2	7	22	0.5308	0.8313	0.097609	FALSE
Renal involvement	TIMP-1 T1	8	39	679888	328715	0.00013612	TRUE
Renal involvement	TIMP-1 T2	7	27	412469	360543	0.176901	FALSE
Renal involvement	TIMP-1 FC	7	27	0.793525	0.964285	0.0598295	FALSE
Renal involvement	TIMP-2 T1	8	39	150001	124917	0.00845832	TRUE
Renal involvement	TIMP-2 T2	7	26	121631	114920	0.746735	FALSE
Renal involvement	TIMP-2 FC	7	26	0.797419	0.986301	0.0601828	FALSE
Renal involvement	TIMP-3 T1	8	39	70338.6	64442	0.798707	FALSE
Renal involvement	TIMP-3 T2	7	27	95566.4	87022.9	0.406019	FALSE
Renal involvement	TIMP-3 FC	7	27	1.49485	1.32867	0.379361	FALSE
Renal involvement	TIMP-4 T1	8	39	1952.19	2008.97	0.640435	FALSE
Renal involvement	TIMP-4 T2	7	27	1288.87	1486.42	0.306463	FALSE
Renal involvement	TIMP-4 FC	7	27	0.526852	0.737342	0.2749	FALSE
Renal involvement	TIMPT total T1	8	39	911264	577234	0.00631558	TRUE
Renal involvement	TIMP total T2	7	26	630931	591832	0.620092	FALSE
Renal involvement	TIMP total FC	7	26	0.850971	0.962804	0.0903492	FALSE
Renal involvement	EMMPRIN CD147 T1	8	39	13932.1	8215.24	1.66891e-05	TRUE
Renal involvement	EMMPRIN CD147 T2	7	27	4842.25	6111.9	0.559121	FALSE
Renal involvement	EMMPRIN FC	7	27	0.348245	0.805016	0.000345378	TRUE
Renal involvement	MMP-1 T1	8	39	2409.95	1866.85	0.0869586	FALSE
Renal involvement	MMP-1 T2	7	27	8907.39	8043.11	0.73897	FALSE
Renal involvement	MMP-1 FC	7	27	3.99059	2.73348	0.90063	FALSE
Renal involvement	MMP-2 T1	8	39	546259	335225	0.00192095	TRUE
Renal involvement	MMP-2 T2	7	27	515955	335118	0.0973794	FALSE
Renal involvement	MMP-2 FC	7	27	0.813809	1.02815	0.0484778	TRUE
Renal involvement	MMP-3 T1	8	39	13192.3	7755.74	0.0283509	TRUE
Renal involvement	MMP-3 T2	7	27	11437.1	6042.8	0.256514	FALSE
Renal involvement	MMP-3 FC	7	27	0.811642	1.03136	0.504054	FALSE
Renal involvement	MMP-7 T1	8	39	6636.09	3080.23	0.000803129	TRUE
Renal involvement	MMP-7 T2	7	27	3635.6	2850.72	0.477584	FALSE
Renal involvement	MMP-7 FC	7	27	0.616321	0.84147	0.011035	TRUE
Renal involvement	MMP-8 T1	8	38	62680.1	47420.3	0.680038	FALSE
Renal involvement	MMP-8 T2	7	27	11532.2	7631.58	0.559121	FALSE
Renal involvement	MMP-8 FC	7	27	0.224611	0.204394	0.587661	FALSE
Renal involvement	MMP-9 T1	8	39	173159	363949	0.045967	TRUE
Renal involvement	MMP-9 T2	7	27	197574	218374	0.707695	FALSE
Renal involvement	MMP-9 FC	7	27	1.01567	0.697787	0.0731729	FALSE
Renal involvement	MMP-10 T1	8	39	774.147	917.52	0.744773	FALSE
Renal involvement	MMP-10 T2	7	26	460.988	557.435	0.675666	FALSE
Renal involvement	MMP-10 FC	7	26	0.685931	0.677901	0.982838	FALSE
Renal involvement	MMP-12 T1	8	39	66.6577	55.86	0.0313475	TRUE
Renal involvement	MMP-12 T2	7	27	68.7189	63.32	0.171884	FALSE
Renal involvement	MMP-12 FC	7	27	1	1	0.898172	FALSE
Renal involvement	MMP-13 T1	8	29	866.205	1143.96	0.416319	FALSE
Renal involvement	MMP-13 T2	7	22	805.377	902.162	0.898565	FALSE
Renal involvement	MMP-13 FC	7	22	0.984309	1.24742	0.664831	FALSE
Renal involvement	TNF-alpha T1	8	38	43.7861	36.1874	0.331611	FALSE
Renal involvement	TNF-alpha T2	7	26	8.96334	16.235	0.566933	FALSE
Renal involvement	TNF-alpha FC	7	26	0.377358	0.61848	0.0385609	TRUE
Renal involvement	MMP-1/TIMP-1 T1	8	39	0.0056155	0.006329	0.335448	FALSE
Renal involvement	MMP-1/TIMP-1 T2	7	27	0.02157	0.021381	0.933662	FALSE
Renal involvement	MMP-1/TIMP-2 T1	8	39	0.0153455	0.013358	0.56861	FALSE
Renal involvement	MMP-1/TIMP-2 T2	7	26	0.085565	0.0660375	1	FALSE
Renal involvement	MMP-1/TIMP-3 T1	8	39	0.044937	0.028363	0.201901	FALSE
Renal involvement	MMP-1/TIMP-3 T2	7	27	0.089554	0.059773	0.701348	FALSE
Renal involvement	MMP-1/TIMP-4 T1	8	39	1.64	1.01	0.403606	FALSE
Renal involvement	MMP-1/TIMP-4 T2	7	27	8.87	5.37	0.559121	FALSE
Renal involvement	MMP-2/TIMP-1 T1	8	39	0.88	0.93	0.640377	FALSE
Renal involvement	MMP-2/TIMP-1 T2	7	27	1.06	0.87	0.267871	FALSE
Renal involvement	MMP-2/TIMP-2 T1	8	39	3.47	2.61	0.0292706	TRUE
Renal involvement	MMP-2/TIMP-2 T2	7	26	4.22	2.6	0.024688	TRUE
Renal involvement	MMP-2/TIMP-3 T1	8	39	7.235	5.71	0.0722497	FALSE
Renal involvement	MMP-2/TIMP-3 T2	7	27	4.4	4.26	0.68571	FALSE
Renal involvement	MMP-2/TIMP-4 T1	8	39	234.83	166.86	0.104467	FALSE
Renal involvement	MMP-2/TIMP-4 T2	7	27	435.44	190.1	0.0598295	FALSE
Renal involvement	MMP-3/TIMP-1 T1	8	39	0.0185125	0.022901	0.587693	FALSE
Renal involvement	MMP-3/TIMP-1 T2	7	27	0.025499	0.017713	0.45186	FALSE
Renal involvement	MMP-3/TIMP-2 T1	8	39	0.079374	0.055558	0.126315	FALSE
Renal involvement	MMP-3/TIMP-2 T2	7	26	0.09799	0.0571175	0.30053	FALSE
Renal involvement	MMP-3/TIMP-3 T1	8	39	0.19	0.11	0.0574946	FALSE
Renal involvement	MMP-3/TIMP-3 T2	7	27	0.11	0.074125	0.394233	FALSE
Renal involvement	MMP-3/TIMP-4 T1	8	39	8.135	5.29	0.124535	FALSE
Renal involvement	MMP-3/TIMP4 T2	7	27	8.77	4.63	0.238961	FALSE
Renal involvement	MMP-7/TIMP-1 T1	8	39	0.010833	0.010585	0.966131	FALSE
Renal involvement	MMP-7/TIMP-1 T2	7	27	0.007841	0.007595	0.867762	FALSE
Renal involvement	MMP-7/TIMP-2 T1	8	39	0.039366	0.029546	0.0816568	FALSE
Renal involvement	MMP-7/TIMP-2 T2	7	26	0.028839	0.023323	0.351778	FALSE
Renal involvement	MMP-7/TIMP-3 T1	8	39	0.094618	0.052543	0.016744	TRUE
Renal involvement	MMP-7/TIMP-3 T2	7	27	0.027793	0.033359	0.90063	FALSE
Renal involvement	MMP-7/TIMP-4 T1	8	39	3.015	2.03	0.0491319	TRUE
Renal involvement	MMP-7/TIMP-4 T2	7	27	2.98	2.24	0.250117	FALSE
Renal involvement	MMP-8/TIMP-1 T1	8	39	0.0890925	0.15	0.152683	FALSE
Renal involvement	MMP-8/TIMP-1 T2	7	27	0.028637	0.019486	0.733284	FALSE
Renal involvement	MMP-8/TIMP-2 T1	8	39	0.35	0.41	0.514935	FALSE
Renal involvement	MMP-8/TIMP-2 T2	7	26	0.11	0.0748325	0.741025	FALSE
Renal involvement	MMP-8/TIMP-3 T1	8	39	0.865	0.47	0.294893	FALSE
Renal involvement	MMP-8/TIMP-3 T2	7	27	0.096108	0.085401	0.509111	FALSE
Renal involvement	MMP-8/TIMP-4 T1	8	39	24.51	28.37	0.988929	FALSE
Renal involvement	MMP-8/TIMP-4 T2	7	27	8.77	6.73	0.286932	FALSE
Renal involvement	MMP-9/TIMP-1 T1	8	39	0.315	1.16	0.00144851	TRUE
Renal involvement	MMP-9/TIMP-1 T2	7	27	0.48	0.66	0.624219	FALSE
Renal involvement	MMP-9/TIMP-2 T1	8	39	1.205	3.06	0.0174041	TRUE
Renal involvement	MMP-9/TIMP-2 T2	7	26	1.62	2.49	0.552114	FALSE
Renal involvement	MMP-9/TIMP-3 T1	8	39	2.8	3.77	0.25159	FALSE
Renal involvement	MMP-9/TIMP-3 T2	7	27	2.07	1.81	0.966804	FALSE
Renal involvement	MMP-9/TIMP-4 T1	7	27	112.88	142.21	0.314183	FALSE
Renal involvement	MMP-9/TIMP-4 T2	7	27	204.59	177.6	0.559121	FALSE
Renal involvement	MMP-10/TIMP-1 T1	8	39	0.00172947	0.00303349	0.0384278	TRUE
Renal involvement	MMP-10/TIMP-1 T2	7	26	0.00111763	0.0015396	0.620092	FALSE
Renal involvement	MMP-10/TIMP-2 T1	8	39	0.0059879	0.00769666	0.191947	FALSE
Renal involvement	MMP-10/TIMP-2 T2	7	25	0.00377055	0.00475736	0.655591	FALSE
Renal involvement	MMP-10/TIMP-3 T1	8	39	0.0138236	0.0105125	0.728467	FALSE
Renal involvement	MMP-10/TIMP-3 T2	7	26	0.00482375	0.00631266	0.7143	FALSE
Renal involvement	MMP-10/TIMP-4 T1	8	39	0.43585	0.4849	0.966795	FALSE
Renal involvement	MMP-10/TIMP-4 T2	7	26	0.7247	0.4887	0.682346	FALSE
Renal involvement	MMP-12/TIMP-1 T1	8	39	0.000151486	0.000165445	0.646577	FALSE
Renal involvement	MMP-12/TIMP-1 T2	7	27	0.000168719	0.000158318	0.90063	FALSE
Renal involvement	MMP-12/TIMP-2 T1	8	39	0.000493443	0.00051049	0.410932	FALSE
Renal involvement	MMP-12/TIMP-2 T2	7	26	0.000589999	0.000583423	0.812857	FALSE
Renal involvement	MMP-12/TIMP-3 T1	8	39	0.00103091	0.000785945	0.0524915	FALSE
Renal involvement	MMP-12/TIMP-3 T2	7	27	0.00069065	0.000447987	0.314183	FALSE
Renal involvement	MMP-12/TIMP-4 T1	8	39	0.0456254	0.0291285	0.212209	FALSE
Renal involvement	MMP-12/TIMP-4 T2	7	27	0.0533171	0.0412367	0.2749	FALSE
Renal involvement	MMP-13/TIMP-1 T1	8	29	0.000952321	0.00315011	0.00495674	TRUE
Renal involvement	MMP-13/TIMP-1 T2	7	22	0.00237016	0.00293776	0.74611	FALSE
Renal involvement	MMP-13/TIMP-2 T1	8	29	0.00450444	0.00710105	0.0615504	FALSE
Renal involvement	MMP-13/TIMP-2 T2	7	21	0.00690024	0.00623845	0.958684	FALSE
Renal involvement	MMP-13/TIMP-3 T1	8	29	0.0130944	0.0191665	0.0861854	FALSE
Renal involvement	MMP-13/TIMP-3 T2	7	22	0.00970226	0.0192592	0.438308	FALSE
Renal involvement	MMP-13/TIMP-4 T1	8	29	0.3363	0.4559	0.373254	FALSE
Renal involvement	MMP-13/TIMP-4 T2	7	22	1.1031	0.7271	0.979668	FALSE
Lung involvement	TIMP-1 T1	37	10	350228	319573	0.804954	FALSE
Lung involvement	TIMP-1 T2	27	7	366683	382865	0.646579	FALSE
Lung involvement	TIMP-1 FC	27	7	0.914427	1.01377	0.802726	FALSE
Lung involvement	TIMP-2 T1	37	10	129855	125797	0.443191	FALSE
Lung involvement	TIMP-2 T2	27	6	121631	109212	0.37223	FALSE
Lung involvement	TIMP-2 FC	27	6	0.910713	0.940044	0.981874	FALSE
Lung involvement	TIMP-3 T1	37	10	67805.8	61795.1	0.968866	FALSE
Lung involvement	TIMP-3 T2	27	7	90091.6	93530.1	0.306463	FALSE
Lung involvement	TIMP-3 FC	27	7	1.35846	1.21385	0.966804	FALSE
Lung involvement	TIMP-4 T1	37	10	1952.7	2049.42	0.745226	FALSE
Lung involvement	TIMP-4 T2	27	7	1486.42	1461.93	0.798207	FALSE
Lung involvement	TIMP-4 FC	27	7	0.734354	0.726037	0.802726	FALSE
Lung involvement	TIMPT total T1	37	10	586668	759773	0.507432	FALSE
Lung involvement	TIMP total T2	27	6	603209	734922	0.172995	FALSE
Lung involvement	TIMP total FC	27	6	0.953517	0.944886	0.945636	FALSE
Lung involvement	EMMPRIN CD147 T1	37	10	8728.07	10221.6	0.304536	FALSE
Lung involvement	EMMPRIN CD147 T2	27	7	5563.68	6200.46	0.867762	FALSE
Lung involvement	EMMPRIN FC	27	7	0.639631	0.685618	0.835109	FALSE
Lung involvement	MMP-1 T1	37	10	1890.17	2195.82	0.369834	FALSE
Lung involvement	MMP-1 T2	27	7	8043.11	8907.39	1	FALSE
Lung involvement	MMP-1 FC	27	7	2.73348	3.99059	0.835109	FALSE
Lung involvement	MMP-2 T1	37	10	358533	313141	0.61224	FALSE
Lung involvement	MMP-2 T2	27	7	356281	295046	0.335078	FALSE
Lung involvement	MMP-2 FC	27	7	0.977479	0.948593	0.933662	FALSE
Lung involvement	MMP-3 T1	37	10	9063.35	9116.74	0.61224	FALSE
Lung involvement	MMP-3 T2	27	7	7996.32	11437.1	0.90063	FALSE
Lung involvement	MMP-3 FC	27	7	1.02904	0.910661	0.933662	FALSE
Lung involvement	MMP-7 T1	37	10	3530.44	4006.16	0.649188	FALSE
Lung involvement	MMP-7 T2	27	7	2656.08	3733.76	0.0484778	TRUE
Lung involvement	MMP-7 FC	27	7	0.682055	0.896313	0.206321	FALSE
Lung involvement	MMP-8 T1	36	10	49861.8	53244.6	0.585108	FALSE
Lung involvement	MMP-8 T2	27	7	7736.61	11532.2	0.587661	FALSE
Lung involvement	MMP-8 FC	27	7	0.204394	0.224611	0.45186	FALSE
Lung involvement	MMP-9 T1	37	10	228810	492592	0.458788	FALSE
Lung involvement	MMP-9 T2	27	7	216978	213813	0.802726	FALSE
Lung involvement	MMP-9 FC	27	7	0.740029	0.899366	0.867762	FALSE
Lung involvement	MMP-10 T1	37	10	924.075	771.685	0.458788	FALSE
Lung involvement	MMP-10 T2	26	7	504.944	642.83	0.243181	FALSE
Lung involvement	MMP-10 FC	26	7	0.639004	0.811501	0.13089	FALSE
Lung involvement	MMP-12 T1	37	10	60.2851	57.76	0.369543	FALSE
Lung involvement	MMP-12 T2	27	7	66.6767	66.84	0.32613	FALSE
Lung involvement	MMP-12 FC	27	7	0.882672	1.16283	0.0666168	FALSE
Lung involvement	MMP-13 T1	30	7	994.854	1143.96	0.627378	FALSE
Lung involvement	MMP-13 T2	24	5	807.933	907.453	0.506511	FALSE
Lung involvement	MMP-13 FC	24	5	1.24742	1.06152	0.583314	FALSE
Lung involvement	TNF-alpha T1	36	10	37.93	35.5324	0.779757	FALSE
Lung involvement	TNF-alpha T2	27	6	13.0668	23.1614	0.262539	FALSE
Lung involvement	TNF-alpha FC	27	6	0.515213	0.586552	0.423895	FALSE
Lung involvement	MMP-1/TIMP-1 T1	37	10	0.005782	0.006708	0.427889	FALSE
Lung involvement	MMP-1/TIMP-1 T2	27	7	0.02157	0.019874	0.616826	FALSE
Lung involvement	MMP-1/TIMP-2 T1	37	10	0.013955	0.016764	0.304536	FALSE
Lung involvement	MMP-1/TIMP-2 T2	27	6	0.065091	0.0805665	0.657353	FALSE
Lung involvement	MMP-1/TIMP-3 T1	37	10	0.032689	0.028162	0.649188	FALSE
Lung involvement	MMP-1/TIMP-3 T2	27	7	0.069165	0.059773	0.359592	FALSE
Lung involvement	MMP-1/TIMP-4 T1	37	10	1.21	0.98	0.794877	FALSE
Lung involvement	MMP-1/TIMP-4 T2	27	7	5.92	5.37	0.770664	FALSE
Lung involvement	MMP-2/TIMP-1 T1	37	10	0.96	0.825	0.499044	FALSE
Lung involvement	MMP-2/TIMP-1 T2	27	7	0.99	0.77	0.201095	FALSE
Lung involvement	MMP-2/TIMP-2 T1	37	10	2.64	2.62	0.630569	FALSE
Lung involvement	MMP-2/TIMP-2 T2	27	6	2.69	2.635	0.326908	FALSE
Lung involvement	MMP-2/TIMP-3 T1	37	10	5.78	6.42	0.804949	FALSE
Lung involvement	MMP-2/TIMP-3 T2	27	7	4.46	3.2	0.179646	FALSE
Lung involvement	MMP-2/TIMP-4 T1	37	10	181.5	155.845	0.524224	FALSE
Lung involvement	MMP-2/TIMP-4 T2	27	7	194.24	191.75	0.802726	FALSE
Lung involvement	MMP-3/TIMP-1 T1	37	10	0.022901	0.0208425	0.541297	FALSE
Lung involvement	MMP-3/TIMP-1 T2	27	7	0.025499	0.017713	0.616826	FALSE
Lung involvement	MMP-3/TIMP-2 T1	37	10	0.061202	0.076417	0.794883	FALSE
Lung involvement	MMP-3/TIMP-2 T2	27	6	0.060161	0.0907175	0.743767	FALSE
Lung involvement	MMP-3/TIMP-3 T1	37	10	0.14	0.0735235	0.0834001	FALSE
Lung involvement	MMP-3/TIMP-3 T2	27	7	0.075164	0.080022	0.639369	FALSE
Lung involvement	MMP-3/TIMP-4 T1	37	10	5.34	4.875	0.329676	FALSE
Lung involvement	MMP-3/TIMP4 T2	27	7	5.3	5.94	0.867762	FALSE
Lung involvement	MMP-7/TIMP-1 T1	37	10	0.010585	0.0103835	0.794906	FALSE
Lung involvement	MMP-7/TIMP-1 T2	27	7	0.007485	0.008035	0.426902	FALSE
Lung involvement	MMP-7/TIMP-2 T1	37	10	0.029678	0.035042	0.725652	FALSE
Lung involvement	MMP-7/TIMP-2 T2	27	6	0.023268	0.0304145	0.04003	TRUE
Lung involvement	MMP-7/TIMP-3 T1	37	10	0.075266	0.0577285	0.369765	FALSE
Lung involvement	MMP-7/TIMP-3 T2	27	7	0.028481	0.032098	0.966804	FALSE
Lung involvement	MMP-7/TIMP-4 T1	37	10	2.3	2.45	0.458775	FALSE
Lung involvement	MMP-7/TIMP-4 T2	27	7	2.31	2.65	0.468995	FALSE
Lung involvement	MMP-8/TIMP-1 T1	37	10	0.1	0.125	0.804871	FALSE
Lung involvement	MMP-8/TIMP-1 T2	27	7	0.019486	0.028637	0.765577	FALSE
Lung involvement	MMP-8/TIMP-2 T1	37	10	0.39	0.41	0.886298	FALSE
Lung involvement	MMP-8/TIMP-2 T2	27	6	0.075124	0.11	0.198985	FALSE
Lung involvement	MMP-8/TIMP-3 T1	37	10	0.67	0.46	0.329634	FALSE
Lung involvement	MMP-8/TIMP-3 T2	27	7	0.089533	0.092226	0.749376	FALSE
Lung involvement	MMP-8/TIMP-4 T1	37	10	28.37	25.935	0.61224	FALSE
Lung involvement	MMP-8/TIMP-4 T2	27	7	7.6	8.77	0.765577	FALSE
Lung involvement	MMP-9/TIMP-1 T1	37	10	0.76	1.71	0.390965	FALSE
Lung involvement	MMP-9/TIMP-1 T2	27	7	0.66	0.43	0.76556	FALSE
Lung involvement	MMP-9/TIMP-2 T1	37	10	1.76	4.645	0.383813	FALSE
Lung involvement	MMP-9/TIMP-2 T2	27	6	2.28	1.925	0.674373	FALSE
Lung involvement	MMP-9/TIMP-3 T1	37	10	3.25	3.395	0.784891	FALSE
Lung involvement	MMP-9/TIMP-3 T2	27	7	2.07	1.81	0.356808	FALSE
Lung involvement	MMP-9/TIMP-4 T1	27	7	140.24	87.71	0.314183	FALSE
Lung involvement	MMP-9/TIMP-4 T2	27	7	189.07	120.81	1	FALSE
Lung involvement	MMP-10/TIMP-1 T1	37	10	0.00300412	0.0022016	0.443191	FALSE
Lung involvement	MMP-10/TIMP-1 T2	26	7	0.00148039	0.00159823	0.560335	FALSE
Lung involvement	MMP-10/TIMP-2 T1	37	10	0.00767176	0.00695793	0.490927	FALSE
Lung involvement	MMP-10/TIMP-2 T2	26	6	0.00400373	0.0049562	0.224685	FALSE
Lung involvement	MMP-10/TIMP-3 T1	37	10	0.0145525	0.00896768	0.236922	FALSE
Lung involvement	MMP-10/TIMP-3 T2	26	7	0.00602776	0.0071353	0.914337	FALSE
Lung involvement	MMP-10/TIMP-4 T1	37	10	0.4939	0.3739	0.427889	FALSE
Lung involvement	MMP-10/TIMP-4 T2	26	7	0.4746	0.7381	0.198672	FALSE
Lung involvement	MMP-12/TIMP-1 T1	37	10	0.000165445	0.000160919	0.412899	FALSE
Lung involvement	MMP-12/TIMP-1 T2	27	7	0.000158318	0.000168719	0.531242	FALSE
Lung involvement	MMP-12/TIMP-2 T1	37	10	0.000524837	0.000423819	0.398224	FALSE
Lung involvement	MMP-12/TIMP-2 T2	27	6	0.000564981	0.000621491	0.479295	FALSE
Lung involvement	MMP-12/TIMP-3 T1	37	10	0.000861363	0.000789551	0.252724	FALSE
Lung involvement	MMP-12/TIMP-3 T2	27	7	0.000538337	0.000508327	0.587661	FALSE
Lung involvement	MMP-12/TIMP-4 T1	37	10	0.0318647	0.027851	0.356123	FALSE
Lung involvement	MMP-12/TIMP-4 T2	27	7	0.0422825	0.0478818	0.676884	FALSE
Lung involvement	MMP-13/TIMP-1 T1	30	7	0.00236942	0.00483084	0.370257	FALSE
Lung involvement	MMP-13/TIMP-1 T2	24	5	0.00277233	0.00237016	0.758301	FALSE
Lung involvement	MMP-13/TIMP-2 T1	30	7	0.00678325	0.00632588	0.608196	FALSE
Lung involvement	MMP-13/TIMP-2 T2	24	4	0.00641293	0.00780865	0.547204	FALSE
Lung involvement	MMP-13/TIMP-3 T1	30	7	0.0184632	0.026143	0.404347	FALSE
Lung involvement	MMP-13/TIMP-3 T2	24	5	0.0122725	0.00970226	0.674464	FALSE
Lung involvement	MMP-13/TIMP-4 T1	30	7	0.4466	0.3995	0.984882	FALSE
Lung involvement	MMP-13/TIMP-4 T2	24	5	0.7271	0.9075	0.750802	FALSE
Prolonged APTT or INR	TIMP-1 T1	17	30	466580	313876	0.00250977	TRUE
Prolonged APTT or INR	TIMP-1 T2	13	21	382865	351242	0.45675	FALSE
Prolonged APTT or INR	TIMP-1 FC	13	21	0.804382	1.01377	0.043384	TRUE
Prolonged APTT or INR	TIMP-2 T1	17	30	127354	130394	0.955859	FALSE
Prolonged APTT or INR	TIMP-2 T2	13	20	116473	119833	0.366699	FALSE
Prolonged APTT or INR	TIMP-2 FC	13	20	0.880109	1.04224	0.17869	FALSE
Prolonged APTT or INR	TIMP-3 T1	17	30	62568.1	66123.9	0.457812	FALSE
Prolonged APTT or INR	TIMP-3 T2	13	21	87022.9	93127.7	0.845392	FALSE
Prolonged APTT or INR	TIMP-3 FC	13	21	1.35846	1.33573	0.887274	FALSE
Prolonged APTT or INR	TIMP-4 T1	17	30	2216.01	1643.17	0.0326249	TRUE
Prolonged APTT or INR	TIMP-4 T2	13	21	1517.32	1461.93	0.644862	FALSE
Prolonged APTT or INR	TIMP-4 FC	13	21	0.547345	0.755802	0.0159605	TRUE
Prolonged APTT or INR	TIMPT total T1	17	30	799375	553420	0.00233222	TRUE
Prolonged APTT or INR	TIMP total T2	13	20	580730	613560	0.75415	FALSE
Prolonged APTT or INR	TIMP total FC	13	20	0.89625	0.991379	0.0487074	TRUE
Prolonged APTT or INR	EMMPRIN CD147 T1	17	30	9753.49	8770.22	0.39399	FALSE
Prolonged APTT or INR	EMMPRIN CD147 T2	13	21	5563.68	6111.9	0.943496	FALSE
Prolonged APTT or INR	EMMPRIN FC	13	21	0.577362	0.685618	0.304083	FALSE
Prolonged APTT or INR	MMP-1 T1	17	30	1675.92	2017.36	0.431877	FALSE
Prolonged APTT or INR	MMP-1 T2	13	21	7280.63	9730.72	0.356841	FALSE
Prolonged APTT or INR	MMP-1 FC	13	21	3.0237	2.58081	0.523543	FALSE
Prolonged APTT or INR	MMP-2 T1	17	30	339903	362712	0.799021	FALSE
Prolonged APTT or INR	MMP-2 T2	13	21	317062	407232	0.256781	FALSE
Prolonged APTT or INR	MMP-2 FC	13	21	0.929574	1.06117	0.178089	FALSE
Prolonged APTT or INR	MMP-3 T1	17	30	8726.29	9114.43	0.273101	FALSE
Prolonged APTT or INR	MMP-3 T2	13	21	11437.1	5313.2	0.118927	FALSE
Prolonged APTT or INR	MMP-3 FC	13	21	0.997563	0.99042	0.72305	FALSE
Prolonged APTT or INR	MMP-7 T1	17	30	4558.82	3205.77	0.227567	FALSE
Prolonged APTT or INR	MMP-7 T2	13	21	2601.58	3380.33	0.103065	FALSE
Prolonged APTT or INR	MMP-7 FC	13	21	0.62157	0.84147	0.103065	FALSE
Prolonged APTT or INR	MMP-8 T1	17	29	66115	41463.6	0.0559272	FALSE
Prolonged APTT or INR	MMP-8 T2	13	21	13307.1	6981.65	0.271945	FALSE
Prolonged APTT or INR	MMP-8 FC	13	21	0.189286	0.232462	0.831615	FALSE
Prolonged APTT or INR	MMP-9 T1	17	30	236983	298680	0.506543	FALSE
Prolonged APTT or INR	MMP-9 T2	13	21	218374	197574	0.338648	FALSE
Prolonged APTT or INR	MMP-9 FC	13	21	0.991382	0.7006	0.0824779	FALSE
Prolonged APTT or INR	MMP-10 T1	17	30	1119.96	838.205	0.375811	FALSE
Prolonged APTT or INR	MMP-10 T2	13	20	548.901	527.697	0.941254	FALSE
Prolonged APTT or INR	MMP-10 FC	13	20	0.542589	0.739956	0.135653	FALSE
Prolonged APTT or INR	MMP-12 T1	17	30	60.2851	59.66	0.594939	FALSE
Prolonged APTT or INR	MMP-12 T2	13	21	63.32	66.84	0.294675	FALSE
Prolonged APTT or INR	MMP-12 FC	13	21	0.947337	1	0.286974	FALSE
Prolonged APTT or INR	MMP-13 T1	13	24	921.919	1146.95	0.24488	FALSE
Prolonged APTT or INR	MMP-13 T2	11	18	810.49	899.605	0.787304	FALSE
Prolonged APTT or INR	MMP-13 FC	11	18	1.32154	1.14452	0.574183	FALSE
Prolonged APTT or INR	TNF-alpha T1	17	29	47.57	36.1748	0.13907	FALSE
Prolonged APTT or INR	TNF-alpha T2	12	21	28.0246	12.0457	0.0723904	FALSE
Prolonged APTT or INR	TNF-alpha FC	12	21	0.57907	0.461313	0.866262	FALSE
Prolonged APTT or INR	MMP-1/TIMP-1 T1	17	30	0.004196	0.0067975	0.00869972	TRUE
Prolonged APTT or INR	MMP-1/TIMP-1 T2	13	21	0.021381	0.02157	0.546872	FALSE
Prolonged APTT or INR	MMP-1/TIMP-2 T1	17	30	0.013965	0.0148395	0.39399	FALSE
Prolonged APTT or INR	MMP-1/TIMP-2 T2	13	20	0.065091	0.0840285	0.428124	FALSE
Prolonged APTT or INR	MMP-1/TIMP-3 T1	17	30	0.019985	0.0328245	0.602855	FALSE
Prolonged APTT or INR	MMP-1/TIMP-3 T2	13	21	0.047085	0.089554	0.303862	FALSE
Prolonged APTT or INR	MMP-1/TIMP-4 T1	17	30	0.77	1.595	0.129297	FALSE
Prolonged APTT or INR	MMP-1/TIMP-4 T2	13	21	6.63	5.37	0.500736	FALSE
Prolonged APTT or INR	MMP-2/TIMP-1 T1	17	30	0.73	1.095	0.00172683	TRUE
Prolonged APTT or INR	MMP-2/TIMP-1 T2	13	21	0.84	0.99	0.264033	FALSE
Prolonged APTT or INR	MMP-2/TIMP-2 T1	17	30	2.3	2.645	0.595131	FALSE
Prolonged APTT or INR	MMP-2/TIMP-2 T2	13	20	2.63	2.695	0.53102	FALSE
Prolonged APTT or INR	MMP-2/TIMP-3 T1	17	30	5.57	5.95	0.610582	FALSE
Prolonged APTT or INR	MMP-2/TIMP-3 T2	13	21	3.2	4.46	0.271872	FALSE
Prolonged APTT or INR	MMP-2/TIMP-4 T1	17	30	138.92	192.585	0.118548	FALSE
Prolonged APTT or INR	MMP-2/TIMP-4 T2	13	21	194.24	193.32	0.595019	FALSE
Prolonged APTT or INR	MMP-3/TIMP-1 T1	17	30	0.018242	0.0247025	0.471795	FALSE
Prolonged APTT or INR	MMP-3/TIMP-1 T2	13	21	0.027506	0.016774	0.118927	FALSE
Prolonged APTT or INR	MMP-3/TIMP-2 T1	17	30	0.072235	0.0592545	0.169783	FALSE
Prolonged APTT or INR	MMP-3/TIMP-2 T2	13	20	0.09799	0.053494	0.0653348	FALSE
Prolonged APTT or INR	MMP-3/TIMP-3 T1	17	30	0.14	0.12	0.312992	FALSE
Prolonged APTT or INR	MMP-3/TIMP-3 T2	13	21	0.12	0.074125	0.329705	FALSE
Prolonged APTT or INR	MMP-3/TIMP-4 T1	17	30	5	5.52	0.682102	FALSE
Prolonged APTT or INR	MMP-3/TIMP4 T2	13	21	8.85	3.53	0.00873004	TRUE
Prolonged APTT or INR	MMP-7/TIMP-1 T1	17	30	0.009522	0.010937	0.0903057	FALSE
Prolonged APTT or INR	MMP-7/TIMP-1 T2	13	21	0.006808	0.007887	0.287712	FALSE
Prolonged APTT or INR	MMP-7/TIMP-2 T1	17	30	0.030884	0.0277125	0.245085	FALSE
Prolonged APTT or INR	MMP-7/TIMP-2 T2	13	20	0.024553	0.023323	0.69886	FALSE
Prolonged APTT or INR	MMP-7/TIMP-3 T1	17	30	0.082286	0.058274	0.369818	FALSE
Prolonged APTT or INR	MMP-7/TIMP-3 T2	13	21	0.026124	0.03605	0.228238	FALSE
Prolonged APTT or INR	MMP-7/TIMP-4 T1	17	30	1.84	2.37	0.64195	FALSE
Prolonged APTT or INR	MMP-7/TIMP-4 T2	13	21	2.46	2.82	0.763224	FALSE
Prolonged APTT or INR	MMP-8/TIMP-1 T1	17	30	0.11	0.115833	0.458073	FALSE
Prolonged APTT or INR	MMP-8/TIMP-1 T2	13	21	0.030675	0.018637	0.249387	FALSE
Prolonged APTT or INR	MMP-8/TIMP-2 T1	17	30	0.42	0.335	0.121119	FALSE
Prolonged APTT or INR	MMP-8/TIMP-2 T2	13	20	0.11	0.071855	0.203387	FALSE
Prolonged APTT or INR	MMP-8/TIMP-3 T1	17	30	1.06	0.445	0.086157	FALSE
Prolonged APTT or INR	MMP-8/TIMP-3 T2	13	21	0.097014	0.066686	0.347632	FALSE
Prolonged APTT or INR	MMP-8/TIMP-4 T1	17	30	28.37	23.545	0.324503	FALSE
Prolonged APTT or INR	MMP-8/TIMP-4 T2	13	21	13.04	4.78	0.00967572	TRUE
Prolonged APTT or INR	MMP-9/TIMP-1 T1	17	30	0.69	1.075	0.113382	FALSE
Prolonged APTT or INR	MMP-9/TIMP-1 T2	13	21	0.79	0.48	0.394962	FALSE
Prolonged APTT or INR	MMP-9/TIMP-2 T1	17	30	1.62	2.27	0.602813	FALSE
Prolonged APTT or INR	MMP-9/TIMP-2 T2	13	20	2.28	1.635	0.347385	FALSE
Prolonged APTT or INR	MMP-9/TIMP-3 T1	17	30	3.73	3.19	0.657886	FALSE
Prolonged APTT or INR	MMP-9/TIMP-3 T2	13	21	2.57	1.71	0.523543	FALSE
Prolonged APTT or INR	MMP-9/TIMP-4 T1	13	21	114.1	140.58	1	FALSE
Prolonged APTT or INR	MMP-9/TIMP-4 T2	13	21	375.61	114.18	0.0306376	TRUE
Prolonged APTT or INR	MMP-10/TIMP-1 T1	17	30	0.00278419	0.00290541	0.458268	FALSE
Prolonged APTT or INR	MMP-10/TIMP-1 T2	13	20	0.00148098	0.00146106	0.726327	FALSE
Prolonged APTT or INR	MMP-10/TIMP-2 T1	17	30	0.00899838	0.00675409	0.282909	FALSE
Prolonged APTT or INR	MMP-10/TIMP-2 T2	13	19	0.00475736	0.00420911	0.645205	FALSE
Prolonged APTT or INR	MMP-10/TIMP-3 T1	17	30	0.0183533	0.0103354	0.698418	FALSE
Prolonged APTT or INR	MMP-10/TIMP-3 T2	13	20	0.00612163	0.00602776	0.868317	FALSE
Prolonged APTT or INR	MMP-10/TIMP-4 T1	17	30	0.3867	0.5671	0.649917	FALSE
Prolonged APTT or INR	MMP-10/TIMP-4 T2	13	20	0.4893	0.5813	0.472477	FALSE
Prolonged APTT or INR	MMP-12/TIMP-1 T1	17	30	0.000155803	0.000172867	0.236211	FALSE
Prolonged APTT or INR	MMP-12/TIMP-1 T2	13	21	0.000156348	0.000185076	0.395034	FALSE
Prolonged APTT or INR	MMP-12/TIMP-2 T1	17	30	0.000533195	0.000467705	0.254191	FALSE
Prolonged APTT or INR	MMP-12/TIMP-2 T2	13	20	0.00058547	0.000573586	0.69886	FALSE
Prolonged APTT or INR	MMP-12/TIMP-3 T1	17	30	0.000833796	0.00082726	0.833403	FALSE
Prolonged APTT or INR	MMP-12/TIMP-3 T2	13	21	0.000436891	0.000652373	0.321062	FALSE
Prolonged APTT or INR	MMP-12/TIMP-4 T1	17	30	0.0258062	0.0397682	0.618372	FALSE
Prolonged APTT or INR	MMP-12/TIMP-4 T2	13	21	0.0478818	0.045468	0.859357	FALSE
Prolonged APTT or INR	MMP-13/TIMP-1 T1	13	24	0.0013622	0.00337358	0.00867318	TRUE
Prolonged APTT or INR	MMP-13/TIMP-1 T2	11	18	0.00237016	0.00277233	0.98207	FALSE
Prolonged APTT or INR	MMP-13/TIMP-2 T1	13	24	0.00576298	0.00714638	0.176342	FALSE
Prolonged APTT or INR	MMP-13/TIMP-2 T2	11	17	0.00690024	0.0065874	1	FALSE
Prolonged APTT or INR	MMP-13/TIMP-3 T1	13	24	0.0170585	0.0191665	0.655974	FALSE
Prolonged APTT or INR	MMP-13/TIMP-3 T2	11	18	0.0139958	0.0100811	0.702427	FALSE
Prolonged APTT or INR	MMP-13/TIMP-4 T1	13	24	0.2633	0.59545	0.0136783	TRUE
Prolonged APTT or INR	MMP-13/TIMP-4 T2	11	18	1.4642	0.72165	0.0621091	FALSE
D dimer >2000 on admission	TIMP-1 T1	31	16	380881	313876	0.0469353	TRUE
D dimer >2000 on admission	TIMP-1 T2	22	12	375557	363358	0.842884	FALSE
D dimer >2000 on admission	TIMP-1 FC	22	12	0.813451	1.09397	0.00725746	TRUE
D dimer >2000 on admission	TIMP-2 T1	31	16	142509	115014	0.108445	FALSE
D dimer >2000 on admission	TIMP-2 T2	22	11	117376	115517	0.803955	FALSE
D dimer >2000 on admission	TIMP-2 FC	22	11	0.89533	1.05606	0.131431	FALSE
D dimer >2000 on admission	TIMP-3 T1	31	16	62568.1	66123.9	0.96415	FALSE
D dimer >2000 on admission	TIMP-3 T2	22	12	90075.3	92829	0.588638	FALSE
D dimer >2000 on admission	TIMP-3 FC	22	12	1.2752	1.34709	0.652372	FALSE
D dimer >2000 on admission	TIMP-4 T1	31	16	2089.87	1836.54	0.559388	FALSE
D dimer >2000 on admission	TIMP-4 T2	22	12	1337.27	1674.53	0.279421	FALSE
D dimer >2000 on admission	TIMP-4 FC	22	12	0.66417	0.873912	0.101066	FALSE
D dimer >2000 on admission	TIMPT total T1	31	16	668349	520180	0.0445017	TRUE
D dimer >2000 on admission	TIMP total T2	22	11	591970	630931	0.349458	FALSE
D dimer >2000 on admission	TIMP total FC	22	11	0.89864	1.07147	0.00889723	TRUE
D dimer >2000 on admission	EMMPRIN CD147 T1	31	16	8161.95	9483.56	0.317768	FALSE
D dimer >2000 on admission	EMMPRIN CD147 T2	22	12	5427.6	6179.7	0.552098	FALSE
D dimer >2000 on admission	EMMPRIN FC	22	12	0.643973	0.709503	0.759362	FALSE
D dimer >2000 on admission	MMP-1 T1	31	16	1866.85	2123.55	0.317768	FALSE
D dimer >2000 on admission	MMP-1 T2	22	12	7661.87	8660.35	0.95689	FALSE
D dimer >2000 on admission	MMP-1 FC	22	12	3.30983	2.59957	0.32167	FALSE
D dimer >2000 on admission	MMP-2 T1	31	16	396081	290359	0.167366	FALSE
D dimer >2000 on admission	MMP-2 T2	22	12	348727	344016	0.528265	FALSE
D dimer >2000 on admission	MMP-2 FC	22	12	0.93836	1.16233	0.116967	FALSE
D dimer >2000 on admission	MMP-3 T1	31	16	10707.5	7253.79	0.0549171	FALSE
D dimer >2000 on admission	MMP-3 T2	22	12	8654.67	7457.59	0.928213	FALSE
D dimer >2000 on admission	MMP-3 FC	22	12	0.915775	1.45339	0.271705	FALSE
D dimer >2000 on admission	MMP-7 T1	31	16	3558.05	3841.22	0.937369	FALSE
D dimer >2000 on admission	MMP-7 T2	22	12	2975.6	2967.8	0.652372	FALSE
D dimer >2000 on admission	MMP-7 FC	22	12	0.698194	0.705165	0.678558	FALSE
D dimer >2000 on admission	MMP-8 T1	30	16	59364.4	44812	0.412931	FALSE
D dimer >2000 on admission	MMP-8 T2	22	12	11390	7245.99	0.678558	FALSE
D dimer >2000 on admission	MMP-8 FC	22	12	0.214887	0.154085	0.528265	FALSE
D dimer >2000 on admission	MMP-9 T1	31	16	228810	518154	0.103584	FALSE
D dimer >2000 on admission	MMP-9 T2	22	12	210899	216094	0.985624	FALSE
D dimer >2000 on admission	MMP-9 FC	22	12	0.852129	0.452543	0.0243006	TRUE
D dimer >2000 on admission	MMP-10 T1	31	16	924.075	757.191	0.522262	FALSE
D dimer >2000 on admission	MMP-10 T2	21	12	543.88	930.553	0.57452	FALSE
D dimer >2000 on admission	MMP-10 FC	21	12	0.664711	0.708412	0.465531	FALSE
D dimer >2000 on admission	MMP-12 T1	31	16	60.2851	57.76	0.425171	FALSE
D dimer >2000 on admission	MMP-12 T2	22	12	63.9583	67.7795	0.247705	FALSE
D dimer >2000 on admission	MMP-12 FC	22	12	0.915004	1.12265	0.116408	FALSE
D dimer >2000 on admission	MMP-13 T1	25	12	1008.15	1062.76	0.909462	FALSE
D dimer >2000 on admission	MMP-13 T2	19	10	805.377	1221.79	0.47675	FALSE
D dimer >2000 on admission	MMP-13 FC	19	10	1.06152	1.24742	0.520585	FALSE
D dimer >2000 on admission	TNF-alpha T1	30	16	40.08	30.9657	0.046039	TRUE
D dimer >2000 on admission	TNF-alpha T2	21	12	18.4372	12.0268	0.303323	FALSE
D dimer >2000 on admission	TNF-alpha FC	21	12	0.545129	0.544644	0.722194	FALSE
D dimer >2000 on admission	MMP-1/TIMP-1 T1	31	16	0.004899	0.00743	0.0240524	TRUE
D dimer >2000 on admission	MMP-1/TIMP-1 T2	22	12	0.022323	0.0188055	0.504968	FALSE
D dimer >2000 on admission	MMP-1/TIMP-2 T1	31	16	0.01282	0.0201975	0.0858923	FALSE
D dimer >2000 on admission	MMP-1/TIMP-2 T2	22	11	0.064638	0.092489	0.83358	FALSE
D dimer >2000 on admission	MMP-1/TIMP-3 T1	31	16	0.031347	0.041986	0.813641	FALSE
D dimer >2000 on admission	MMP-1/TIMP-3 T2	22	12	0.0610985	0.0746635	0.899582	FALSE
D dimer >2000 on admission	MMP-1/TIMP-4 T1	31	16	0.95	1.54	0.438527	FALSE
D dimer >2000 on admission	MMP-1/TIMP-4 T2	22	12	6.275	5.135	0.482223	FALSE
D dimer >2000 on admission	MMP-2/TIMP-1 T1	31	16	0.93	0.965	0.582204	FALSE
D dimer >2000 on admission	MMP-2/TIMP-1 T2	22	12	0.93	0.915	0.601097	FALSE
D dimer >2000 on admission	MMP-2/TIMP-2 T1	31	16	2.62	2.635	0.919521	FALSE
D dimer >2000 on admission	MMP-2/TIMP-2 T2	22	11	2.83	2.64	0.369398	FALSE
D dimer >2000 on admission	MMP-2/TIMP-3 T1	31	16	6.48	5.23	0.13252	FALSE
D dimer >2000 on admission	MMP-2/TIMP-3 T2	22	12	4.055	4.4	0.814768	FALSE
D dimer >2000 on admission	MMP-2/TIMP-4 T1	31	16	194.53	169.715	0.727851	FALSE
D dimer >2000 on admission	MMP-2/TIMP-4 T2	22	12	236.9	192.535	0.601292	FALSE
D dimer >2000 on admission	MMP-3/TIMP-1 T1	31	16	0.022901	0.021309	0.307015	FALSE
D dimer >2000 on admission	MMP-3/TIMP-1 T2	22	12	0.0258395	0.0172435	0.626608	FALSE
D dimer >2000 on admission	MMP-3/TIMP-2 T1	31	16	0.072235	0.0563705	0.242967	FALSE
D dimer >2000 on admission	MMP-3/TIMP-2 T2	22	11	0.0659575	0.083445	0.9543	FALSE
D dimer >2000 on admission	MMP-3/TIMP-3 T1	31	16	0.16	0.11	0.0619965	FALSE
D dimer >2000 on admission	MMP-3/TIMP-3 T2	22	12	0.0746445	0.085038	0.885365	FALSE
D dimer >2000 on admission	MMP-3/TIMP-4 T1	31	16	5.93	3.875	0.064	FALSE
D dimer >2000 on admission	MMP-3/TIMP4 T2	22	12	7.475	3.695	0.271705	FALSE
D dimer >2000 on admission	MMP-7/TIMP-1 T1	31	16	0.010133	0.0119605	0.0535062	FALSE
D dimer >2000 on admission	MMP-7/TIMP-1 T2	22	12	0.007952	0.006909	0.256299	FALSE
D dimer >2000 on admission	MMP-7/TIMP-2 T1	31	16	0.029678	0.032459	0.399844	FALSE
D dimer >2000 on admission	MMP-7/TIMP-2 T2	22	11	0.024792	0.02229	0.6331	FALSE
D dimer >2000 on admission	MMP-7/TIMP-3 T1	31	16	0.072065	0.0640875	0.711018	FALSE
D dimer >2000 on admission	MMP-7/TIMP-3 T2	22	12	0.032375	0.0269545	0.576448	FALSE
D dimer >2000 on admission	MMP-7/TIMP-4 T1	31	16	2.41	2.26	0.839864	FALSE
D dimer >2000 on admission	MMP-7/TIMP-4 T2	22	12	2.915	1.835	0.182371	FALSE
D dimer >2000 on admission	MMP-8/TIMP-1 T1	31	16	0.097423	0.15	0.677763	FALSE
D dimer >2000 on admission	MMP-8/TIMP-1 T2	22	12	0.029379	0.018062	0.552068	FALSE
D dimer >2000 on admission	MMP-8/TIMP-2 T1	31	16	0.39	0.42	0.937358	FALSE
D dimer >2000 on admission	MMP-8/TIMP-2 T2	22	11	0.081343	0.075124	0.984755	FALSE
D dimer >2000 on admission	MMP-8/TIMP-3 T1	31	16	0.58	0.56	0.406117	FALSE
D dimer >2000 on admission	MMP-8/TIMP-3 T2	22	12	0.094537	0.061532	0.552068	FALSE
D dimer >2000 on admission	MMP-8/TIMP-4 T1	31	16	28.37	25.405	0.761826	FALSE
D dimer >2000 on admission	MMP-8/TIMP-4 T2	22	12	8.21	4.595	0.387057	FALSE
D dimer >2000 on admission	MMP-9/TIMP-1 T1	31	16	0.71	1.825	0.0254808	TRUE
D dimer >2000 on admission	MMP-9/TIMP-1 T2	22	12	0.64	0.605	0.691756	FALSE
D dimer >2000 on admission	MMP-9/TIMP-2 T1	31	16	1.62	4.85	0.0285828	TRUE
D dimer >2000 on admission	MMP-9/TIMP-2 T2	22	11	2.02	2.35	0.863531	FALSE
D dimer >2000 on admission	MMP-9/TIMP-3 T1	31	16	3.13	3.65	0.412503	FALSE
D dimer >2000 on admission	MMP-9/TIMP-3 T2	22	12	1.76	2.16	0.786944	FALSE
D dimer >2000 on admission	MMP-9/TIMP-4 T1	22	12	113.005	141.395	0.678558	FALSE
D dimer >2000 on admission	MMP-9/TIMP-4 T2	22	12	196.83	145.89	0.417455	FALSE
D dimer >2000 on admission	MMP-10/TIMP-1 T1	31	16	0.00278419	0.00320253	0.507782	FALSE
D dimer >2000 on admission	MMP-10/TIMP-1 T2	21	12	0.00148098	0.00225287	0.895788	FALSE
D dimer >2000 on admission	MMP-10/TIMP-2 T1	31	16	0.00767176	0.00679382	0.901728	FALSE
D dimer >2000 on admission	MMP-10/TIMP-2 T2	21	11	0.00420911	0.00436773	0.55175	FALSE
D dimer >2000 on admission	MMP-10/TIMP-3 T1	31	16	0.0145525	0.0101279	0.536975	FALSE
D dimer >2000 on admission	MMP-10/TIMP-3 T2	21	12	0.00596983	0.00844692	0.666922	FALSE
D dimer >2000 on admission	MMP-10/TIMP-4 T1	31	16	0.4763	0.48155	0.955241	FALSE
D dimer >2000 on admission	MMP-10/TIMP-4 T2	21	12	0.5195	0.5177	0.895788	FALSE
D dimer >2000 on admission	MMP-12/TIMP-1 T1	31	16	0.000162591	0.000177024	0.493505	FALSE
D dimer >2000 on admission	MMP-12/TIMP-1 T2	22	12	0.000157333	0.000188919	0.899628	FALSE
D dimer >2000 on admission	MMP-12/TIMP-2 T1	31	16	0.000471898	0.000510623	0.796266	FALSE
D dimer >2000 on admission	MMP-12/TIMP-2 T2	22	11	0.000583423	0.000641883	0.311528	FALSE
D dimer >2000 on admission	MMP-12/TIMP-3 T1	31	16	0.000833796	0.00082726	0.472485	FALSE
D dimer >2000 on admission	MMP-12/TIMP-3 T2	22	12	0.000516814	0.000620539	0.786944	FALSE
D dimer >2000 on admission	MMP-12/TIMP-4 T1	31	16	0.0318647	0.0288352	0.778992	FALSE
D dimer >2000 on admission	MMP-12/TIMP-4 T2	22	12	0.0500496	0.0410927	0.552098	FALSE
D dimer >2000 on admission	MMP-13/TIMP-1 T1	25	12	0.00235829	0.00316424	0.40805	FALSE
D dimer >2000 on admission	MMP-13/TIMP-1 T2	19	10	0.00237016	0.00341375	0.730753	FALSE
D dimer >2000 on admission	MMP-13/TIMP-2 T1	25	12	0.00647423	0.00796179	0.338514	FALSE
D dimer >2000 on admission	MMP-13/TIMP-2 T2	19	9	0.00623845	0.00883802	0.491021	FALSE
D dimer >2000 on admission	MMP-13/TIMP-3 T1	25	12	0.0191665	0.0159714	0.661331	FALSE
D dimer >2000 on admission	MMP-13/TIMP-3 T2	19	10	0.0105492	0.0136603	0.836421	FALSE
D dimer >2000 on admission	MMP-13/TIMP-4 T1	25	12	0.4264	0.4466	0.883922	FALSE
D dimer >2000 on admission	MMP-13/TIMP-4 T2	19	10	0.7271	0.81185	0.836401	FALSE
Hyponatremia	TIMP-1 T1	35	12	369251	313294	0.227172	FALSE
Hyponatremia	TIMP-1 T2	24	10	380987	312509	0.08548	FALSE
Hyponatremia	TIMP-1 FC	24	10	0.883204	1.03191	0.719546	FALSE
Hyponatremia	TIMP-2 T1	35	12	130933	122137	0.61697	FALSE
Hyponatremia	TIMP-2 T2	24	9	126089	104131	0.0201094	TRUE
Hyponatremia	TIMP-2 FC	24	9	0.980463	0.880081	0.322001	FALSE
Hyponatremia	TIMP-3 T1	35	12	62568.1	73597.2	0.236224	FALSE
Hyponatremia	TIMP-3 T2	24	10	93328.9	80348.8	0.909681	FALSE
Hyponatremia	TIMP-3 FC	24	10	1.44333	1.00034	0.335141	FALSE
Hyponatremia	TIMP-4 T1	35	12	2151.6	1319.12	0.00903614	TRUE
Hyponatremia	TIMP-4 T2	24	10	1571.28	1091.38	0.112246	FALSE
Hyponatremia	TIMP-4 FC	24	10	0.730195	0.689104	0.508332	FALSE
Hyponatremia	TIMPT total T1	35	12	623368	597308	0.816712	FALSE
Hyponatremia	TIMP total T2	24	9	615683	550085	0.342147	FALSE
Hyponatremia	TIMP total FC	24	9	0.955458	0.90103	0.407295	FALSE
Hyponatremia	EMMPRIN CD147 T1	35	12	9499.14	7857.56	0.311301	FALSE
Hyponatremia	EMMPRIN CD147 T2	24	10	6313.02	5657.57	0.438442	FALSE
Hyponatremia	EMMPRIN FC	24	10	0.623695	0.809975	0.335141	FALSE
Hyponatremia	MMP-1 T1	35	12	1890.17	2517.3	0.208945	FALSE
Hyponatremia	MMP-1 T2	24	10	8746.3	7661.87	1	FALSE
Hyponatremia	MMP-1 FC	24	10	2.70283	2.91063	0.55798	FALSE
Hyponatremia	MMP-2 T1	35	12	358533	337564	0.687273	FALSE
Hyponatremia	MMP-2 T2	24	10	394041	275384	0.167719	FALSE
Hyponatremia	MMP-2 FC	24	10	1.04466	0.93836	0.438442	FALSE
Hyponatremia	MMP-3 T1	35	12	10707.5	6003.96	0.0691232	FALSE
Hyponatremia	MMP-3 T2	24	10	10514.7	3967.93	0.0667836	FALSE
Hyponatremia	MMP-3 FC	24	10	1.0133	0.859376	0.66381	FALSE
Hyponatremia	MMP-7 T1	35	12	3629.77	3544.25	0.835714	FALSE
Hyponatremia	MMP-7 T2	24	10	2975.6	3181.18	0.484406	FALSE
Hyponatremia	MMP-7 FC	24	10	0.677126	0.829624	0.55798	FALSE
Hyponatremia	MMP-8 T1	34	12	59364.4	47420.3	0.265624	FALSE
Hyponatremia	MMP-8 T2	24	10	11390	5773.64	0.0667836	FALSE
Hyponatremia	MMP-8 FC	24	10	0.230461	0.113204	0.108197	FALSE
Hyponatremia	MMP-9 T1	35	12	237126	238989	0.574689	FALSE
Hyponatremia	MMP-9 T2	24	10	226906	138580	0.219303	FALSE
Hyponatremia	MMP-9 FC	24	10	0.757528	0.44152	0.461104	FALSE
Hyponatremia	MMP-10 T1	35	12	852.16	893.728	0.779033	FALSE
Hyponatremia	MMP-10 T2	23	10	548.901	538.365	0.505413	FALSE
Hyponatremia	MMP-10 FC	23	10	0.685931	0.619525	0.860075	FALSE
Hyponatremia	MMP-12 T1	35	12	60.2851	57.76	0.678135	FALSE
Hyponatremia	MMP-12 T2	24	10	65.6366	67.7795	0.232706	FALSE
Hyponatremia	MMP-12 FC	24	10	1	0.915004	0.835074	FALSE
Hyponatremia	MMP-13 T1	29	8	1008.15	994.263	0.795924	FALSE
Hyponatremia	MMP-13 T2	22	7	858.972	534.813	0.798762	FALSE
Hyponatremia	MMP-13 FC	22	7	1.24742	1.06152	0.878467	FALSE
Hyponatremia	TNF-alpha T1	34	12	40.08	35.5324	0.276501	FALSE
Hyponatremia	TNF-alpha T2	23	10	18.4372	12.0268	0.202899	FALSE
Hyponatremia	TNF-alpha FC	23	10	0.545129	0.545361	0.54373	FALSE
Hyponatremia	MMP-1/TIMP-1 T1	35	12	0.005098	0.008535	0.0308363	TRUE
Hyponatremia	MMP-1/TIMP-1 T2	24	10	0.0214755	0.021983	0.461104	FALSE
Hyponatremia	MMP-1/TIMP-2 T1	35	12	0.013965	0.0231925	0.168062	FALSE
Hyponatremia	MMP-1/TIMP-2 T2	24	9	0.064638	0.086963	0.302484	FALSE
Hyponatremia	MMP-1/TIMP-3 T1	35	12	0.032689	0.028162	0.705311	FALSE
Hyponatremia	MMP-1/TIMP-3 T2	24	10	0.0730695	0.0626925	0.864883	FALSE
Hyponatremia	MMP-1/TIMP-4 T1	35	12	0.77	2.03	0.0218041	TRUE
Hyponatremia	MMP-1/TIMP-4 T2	24	10	5.31	8.365	0.205448	FALSE
Hyponatremia	MMP-2/TIMP-1 T1	35	12	0.93	0.995	0.751061	FALSE
Hyponatremia	MMP-2/TIMP-1 T2	24	10	0.93	0.875	0.677422	FALSE
Hyponatremia	MMP-2/TIMP-2 T1	35	12	2.63	2.575	0.696245	FALSE
Hyponatremia	MMP-2/TIMP-2 T2	24	9	2.765	2.54	0.363002	FALSE
Hyponatremia	MMP-2/TIMP-3 T1	35	12	5.88	5.675	0.669402	FALSE
Hyponatremia	MMP-2/TIMP-3 T2	24	10	4.4	3.15	0.416363	FALSE
Hyponatremia	MMP-2/TIMP-4 T1	35	12	172.32	194.495	0.175717	FALSE
Hyponatremia	MMP-2/TIMP-4 T2	24	10	193.78	218.25	0.484406	FALSE
Hyponatremia	MMP-3/TIMP-1 T1	35	12	0.024652	0.019001	0.236699	FALSE
Hyponatremia	MMP-3/TIMP-1 T2	24	10	0.0265025	0.015274	0.167719	FALSE
Hyponatremia	MMP-3/TIMP-2 T1	35	12	0.072235	0.0454595	0.069083	FALSE
Hyponatremia	MMP-3/TIMP-2 T2	24	9	0.079479	0.033017	0.175506	FALSE
Hyponatremia	MMP-3/TIMP-3 T1	35	12	0.14	0.07006	0.0686893	FALSE
Hyponatremia	MMP-3/TIMP-3 T2	24	10	0.105	0.061123	0.0667419	FALSE
Hyponatremia	MMP-3/TIMP-4 T1	35	12	5.34	5.02	0.687273	FALSE
Hyponatremia	MMP-3/TIMP4 T2	24	10	6.75	4.065	0.484406	FALSE
Hyponatremia	MMP-7/TIMP-1 T1	35	12	0.010326	0.011237	0.873993	FALSE
Hyponatremia	MMP-7/TIMP-1 T2	24	10	0.007319	0.0101245	0.145624	FALSE
Hyponatremia	MMP-7/TIMP-2 T1	35	12	0.029678	0.0334035	0.970807	FALSE
Hyponatremia	MMP-7/TIMP-2 T2	24	9	0.022813	0.024553	0.129558	FALSE
Hyponatremia	MMP-7/TIMP-3 T1	35	12	0.072065	0.044124	0.517873	FALSE
Hyponatremia	MMP-7/TIMP-3 T2	24	10	0.032375	0.025149	0.484406	FALSE
Hyponatremia	MMP-7/TIMP-4 T1	35	12	1.94	2.71	0.0899381	FALSE
Hyponatremia	MMP-7/TIMP-4 T2	24	10	2.385	3.245	0.0889486	FALSE
Hyponatremia	MMP-8/TIMP-1 T1	35	12	0.11	0.120832	0.873943	FALSE
Hyponatremia	MMP-8/TIMP-1 T2	24	10	0.029379	0.0152865	0.121196	FALSE
Hyponatremia	MMP-8/TIMP-2 T1	35	12	0.41	0.39	0.566346	FALSE
Hyponatremia	MMP-8/TIMP-2 T2	24	9	0.0828755	0.05848	0.248986	FALSE
Hyponatremia	MMP-8/TIMP-3 T1	35	12	0.64	0.395	0.399907	FALSE
Hyponatremia	MMP-8/TIMP-3 T2	24	10	0.094607	0.0548925	0.047204	TRUE
Hyponatremia	MMP-8/TIMP-4 T1	35	12	28.35	28.24	0.854813	FALSE
Hyponatremia	MMP-8/TIMP-4 T2	24	10	8.185	6.215	0.83531	FALSE
Hyponatremia	MMP-9/TIMP-1 T1	35	12	0.76	1.055	0.931944	FALSE
Hyponatremia	MMP-9/TIMP-1 T2	24	10	0.64	0.515	0.395019	FALSE
Hyponatremia	MMP-9/TIMP-2 T1	35	12	2.31	1.835	0.678284	FALSE
Hyponatremia	MMP-9/TIMP-2 T2	24	9	2.28	1.65	0.557724	FALSE
Hyponatremia	MMP-9/TIMP-3 T1	35	12	3.73	2.765	0.696254	FALSE
Hyponatremia	MMP-9/TIMP-3 T2	24	10	2.22	1.56	0.179669	FALSE
Hyponatremia	MMP-9/TIMP-4 T1	24	10	127.08	124.335	0.719546	FALSE
Hyponatremia	MMP-9/TIMP-4 T2	24	10	157.55	185.235	0.719546	FALSE
Hyponatremia	MMP-10/TIMP-1 T1	35	12	0.00300412	0.00256543	0.990267	FALSE
Hyponatremia	MMP-10/TIMP-1 T2	23	10	0.00125558	0.00166508	0.202974	FALSE
Hyponatremia	MMP-10/TIMP-2 T1	35	12	0.00767176	0.00716742	0.634252	FALSE
Hyponatremia	MMP-10/TIMP-2 T2	23	9	0.00420911	0.00515503	0.257781	FALSE
Hyponatremia	MMP-10/TIMP-3 T1	35	12	0.0145525	0.00991826	0.471694	FALSE
Hyponatremia	MMP-10/TIMP-3 T2	23	10	0.00612163	0.00594484	0.890947	FALSE
Hyponatremia	MMP-10/TIMP-4 T1	35	12	0.4763	0.99105	0.266962	FALSE
Hyponatremia	MMP-10/TIMP-4 T2	23	10	0.4611	0.6906	0.15277	FALSE
Hyponatremia	MMP-12/TIMP-1 T1	35	12	0.000162591	0.000179968	0.288558	FALSE
Hyponatremia	MMP-12/TIMP-1 T2	24	10	0.00014954	0.000227437	0.0472209	TRUE
Hyponatremia	MMP-12/TIMP-2 T1	35	12	0.000463511	0.000526487	0.61697	FALSE
Hyponatremia	MMP-12/TIMP-2 T2	24	9	0.000535986	0.000641883	0.0548486	FALSE
Hyponatremia	MMP-12/TIMP-3 T1	35	12	0.000861363	0.00080987	0.634242	FALSE
Hyponatremia	MMP-12/TIMP-3 T2	24	10	0.000516814	0.000734018	0.748006	FALSE
Hyponatremia	MMP-12/TIMP-4 T1	35	12	0.0285418	0.0522728	0.0691232	FALSE
Hyponatremia	MMP-12/TIMP-4 T2	24	10	0.039762	0.0605577	0.145624	FALSE
Hyponatremia	MMP-13/TIMP-1 T1	29	8	0.00238056	0.00244703	0.624968	FALSE
Hyponatremia	MMP-13/TIMP-1 T2	22	7	0.00277233	0.00213994	0.784157	FALSE
Hyponatremia	MMP-13/TIMP-2 T1	29	8	0.00682327	0.00591089	0.84235	FALSE
Hyponatremia	MMP-13/TIMP-2 T2	22	6	0.00716905	0.00490673	0.603886	FALSE
Hyponatremia	MMP-13/TIMP-3 T1	29	8	0.0187466	0.0201893	0.438393	FALSE
Hyponatremia	MMP-13/TIMP-3 T2	22	7	0.0141284	0.00706477	0.784157	FALSE
Hyponatremia	MMP-13/TIMP-4 T1	29	8	0.4373	0.64895	0.413913	FALSE
Hyponatremia	MMP-13/TIMP-4 T2	22	7	0.64755	1.1031	0.102875	FALSE
Lymphopenia	TIMP-1 T1	32	14	373622	326381	0.0678101	FALSE
Lymphopenia	TIMP-1 T2	25	8	382865	312509	0.0318759	TRUE
Lymphopenia	TIMP-1 FC	25	8	0.860166	0.989027	0.495821	FALSE
Lymphopenia	TIMP-2 T1	32	14	132485	125162	0.820586	FALSE
Lymphopenia	TIMP-2 T2	25	7	116473	118035	0.929026	FALSE
Lymphopenia	TIMP-2 FC	25	7	0.910551	0.994119	0.929026	FALSE
Lymphopenia	TIMP-3 T1	32	14	63505.1	67805.8	0.684568	FALSE
Lymphopenia	TIMP-3 T2	25	8	93127.7	81660.6	0.883051	FALSE
Lymphopenia	TIMP-3 FC	25	8	1.42609	0.955973	0.0976641	FALSE
Lymphopenia	TIMP-4 T1	32	14	2120.74	1771.9	0.41695	FALSE
Lymphopenia	TIMP-4 T2	25	8	1486.42	1341.33	0.983234	FALSE
Lymphopenia	TIMP-4 FC	25	8	0.726037	0.756823	0.606357	FALSE
Lymphopenia	TIMPT total T1	32	14	658391	604464	0.185192	FALSE
Lymphopenia	TIMP total T2	25	7	610113	603209	0.623593	FALSE
Lymphopenia	TIMP total FC	25	7	0.933741	0.967662	0.823732	FALSE
Lymphopenia	EMMPRIN CD147 T1	32	14	8770.22	9626.32	0.952409	FALSE
Lymphopenia	EMMPRIN CD147 T2	25	8	5563.68	6333.78	0.420288	FALSE
Lymphopenia	EMMPRIN FC	25	8	0.613655	0.819446	0.204493	FALSE
Lymphopenia	MMP-1 T1	32	14	1875.61	2142.53	0.288082	FALSE
Lymphopenia	MMP-1 T2	25	8	8585.21	3640.04	0.420288	FALSE
Lymphopenia	MMP-1 FC	25	8	3.0237	2.03167	0.0738077	FALSE
Lymphopenia	MMP-2 T1	32	14	369635	331822	0.624564	FALSE
Lymphopenia	MMP-2 T2	25	8	335118	403085	0.577756	FALSE
Lymphopenia	MMP-2 FC	25	8	0.962064	1.07629	0.522458	FALSE
Lymphopenia	MMP-3 T1	32	14	8945.9	10288.9	0.693654	FALSE
Lymphopenia	MMP-3 T2	25	8	10488.4	4779.87	0.885469	FALSE
Lymphopenia	MMP-3 FC	25	8	0.997563	1.10491	0.983583	FALSE
Lymphopenia	MMP-7 T1	32	14	4036.27	3544.25	0.711362	FALSE
Lymphopenia	MMP-7 T2	25	8	2687.82	3877.68	0.00424383	TRUE
Lymphopenia	MMP-7 FC	25	8	0.672198	0.806808	0.290391	FALSE
Lymphopenia	MMP-8 T1	32	13	55686.1	47244	0.716526	FALSE
Lymphopenia	MMP-8 T2	25	8	11247.9	4803.3	0.204493	FALSE
Lymphopenia	MMP-8 FC	25	8	0.189286	0.234386	0.918057	FALSE
Lymphopenia	MMP-9 T1	32	14	230995	365007	0.481266	FALSE
Lymphopenia	MMP-9 T2	25	8	236834	136818	0.162429	FALSE
Lymphopenia	MMP-9 FC	25	8	0.764008	0.350905	0.0547654	FALSE
Lymphopenia	MMP-10 T1	32	14	776.78	1455.65	0.0233303	TRUE
Lymphopenia	MMP-10 T2	25	7	543.88	1222.42	0.132474	FALSE
Lymphopenia	MMP-10 FC	25	7	0.685931	0.761273	0.929026	FALSE
Lymphopenia	MMP-12 T1	32	14	59.9725	59.9725	0.99047	FALSE
Lymphopenia	MMP-12 T2	25	8	63.32	68.7189	0.109792	FALSE
Lymphopenia	MMP-12 FC	25	8	0.947337	1.1434	0.130136	FALSE
Lymphopenia	MMP-13 T1	26	10	951.74	1233.83	0.146974	FALSE
Lymphopenia	MMP-13 T2	22	6	807.933	1228.95	0.910792	FALSE
Lymphopenia	MMP-13 FC	22	6	1.32278	1.01056	0.300229	FALSE
Lymphopenia	TNF-alpha T1	31	14	37.93	35.2109	0.484704	FALSE
Lymphopenia	TNF-alpha T2	24	8	15.1801	19.6336	0.711395	FALSE
Lymphopenia	TNF-alpha FC	24	8	0.542423	0.571594	0.781624	FALSE
Lymphopenia	MMP-1/TIMP-1 T1	32	14	0.0054395	0.0068245	0.0516992	FALSE
Lymphopenia	MMP-1/TIMP-1 T2	25	8	0.02157	0.011668	0.606357	FALSE
Lymphopenia	MMP-1/TIMP-2 T1	32	14	0.014919	0.014474	0.370665	FALSE
Lymphopenia	MMP-1/TIMP-2 T2	25	7	0.066984	0.034611	0.784445	FALSE
Lymphopenia	MMP-1/TIMP-3 T1	32	14	0.034182	0.029855	0.747239	FALSE
Lymphopenia	MMP-1/TIMP-3 T2	25	8	0.069165	0.0451815	0.412498	FALSE
Lymphopenia	MMP-1/TIMP-4 T1	32	14	0.86	1.665	0.339534	FALSE
Lymphopenia	MMP-1/TIMP-4 T2	25	8	5.92	2.03	0.351703	FALSE
Lymphopenia	MMP-2/TIMP-1 T1	32	14	0.825	1.095	0.104429	FALSE
Lymphopenia	MMP-2/TIMP-1 T2	25	8	0.84	1.145	0.119893	FALSE
Lymphopenia	MMP-2/TIMP-2 T1	32	14	2.645	2.3	0.607733	FALSE
Lymphopenia	MMP-2/TIMP-2 T2	25	7	2.64	2.69	0.927345	FALSE
Lymphopenia	MMP-2/TIMP-3 T1	32	14	5.745	5.95	0.857897	FALSE
Lymphopenia	MMP-2/TIMP-3 T2	25	8	3.85	5.3	0.462213	FALSE
Lymphopenia	MMP-2/TIMP-4 T1	32	14	177.035	164.025	0.952409	FALSE
Lymphopenia	MMP-2/TIMP-4 T2	25	8	191.75	222.795	0.983583	FALSE
Lymphopenia	MMP-3/TIMP-1 T1	32	14	0.0207605	0.025497	0.802074	FALSE
Lymphopenia	MMP-3/TIMP-1 T2	25	8	0.025499	0.0184185	0.950783	FALSE
Lymphopenia	MMP-3/TIMP-2 T1	32	14	0.0658125	0.068569	0.511437	FALSE
Lymphopenia	MMP-3/TIMP-2 T2	25	7	0.075046	0.058639	0.873182	FALSE
Lymphopenia	MMP-3/TIMP-3 T1	32	14	0.145	0.11	0.236585	FALSE
Lymphopenia	MMP-3/TIMP-3 T2	25	8	0.081739	0.07314	0.62897	FALSE
Lymphopenia	MMP-3/TIMP-4 T1	32	14	5.145	6.03	0.820586	FALSE
Lymphopenia	MMP-3/TIMP4 T2	25	8	6.09	4.065	0.495821	FALSE
Lymphopenia	MMP-7/TIMP-1 T1	32	14	0.009866	0.0115695	0.158972	FALSE
Lymphopenia	MMP-7/TIMP-1 T2	25	8	0.00686	0.0135265	0.00670721	TRUE
Lymphopenia	MMP-7/TIMP-2 T1	32	14	0.0307395	0.030863	0.802074	FALSE
Lymphopenia	MMP-7/TIMP-2 T2	25	7	0.023378	0.025973	0.223961	FALSE
Lymphopenia	MMP-7/TIMP-3 T1	32	14	0.0776035	0.045963	0.288008	FALSE
Lymphopenia	MMP-7/TIMP-3 T2	25	8	0.027473	0.0378345	0.271588	FALSE
Lymphopenia	MMP-7/TIMP-4 T1	32	14	2.165	2.495	0.738199	FALSE
Lymphopenia	MMP-7/TIMP-4 T2	25	8	2.31	3.425	0.274697	FALSE
Lymphopenia	MMP-8/TIMP-1 T1	32	14	0.105	0.135	0.886051	FALSE
Lymphopenia	MMP-8/TIMP-1 T2	25	8	0.028637	0.013532	0.35535	FALSE
Lymphopenia	MMP-8/TIMP-2 T1	32	14	0.41	0.4	0.693601	FALSE
Lymphopenia	MMP-8/TIMP-2 T2	25	7	0.080343	0.037544	0.411579	FALSE
Lymphopenia	MMP-8/TIMP-3 T1	32	14	0.705	0.39	0.277341	FALSE
Lymphopenia	MMP-8/TIMP-3 T2	25	8	0.096108	0.04838	0.0741792	FALSE
Lymphopenia	MMP-8/TIMP-4 T1	32	14	28.36	26.38	0.783672	FALSE
Lymphopenia	MMP-8/TIMP-4 T2	25	8	10.13	3.8	0.0888524	FALSE
Lymphopenia	MMP-9/TIMP-1 T1	32	14	0.735	1.435	0.162508	FALSE
Lymphopenia	MMP-9/TIMP-1 T2	25	8	0.66	0.435	0.48815	FALSE
Lymphopenia	MMP-9/TIMP-2 T1	32	14	1.69	3.275	0.51145	FALSE
Lymphopenia	MMP-9/TIMP-2 T2	25	7	2.35	1.21	0.294349	FALSE
Lymphopenia	MMP-9/TIMP-3 T1	32	14	3.63	3.19	0.904981	FALSE
Lymphopenia	MMP-9/TIMP-3 T2	25	8	2.53	1.635	0.204493	FALSE
Lymphopenia	MMP-9/TIMP-4 T1	25	8	140.24	98.25	0.310009	FALSE
Lymphopenia	MMP-9/TIMP-4 T2	25	8	218.9	126.3	0.126996	FALSE
Lymphopenia	MMP-10/TIMP-1 T1	32	14	0.00246466	0.00525772	0.00673728	TRUE
Lymphopenia	MMP-10/TIMP-1 T2	25	7	0.00125558	0.0033905	0.0675026	FALSE
Lymphopenia	MMP-10/TIMP-2 T1	32	14	0.00658997	0.00910399	0.0326295	TRUE
Lymphopenia	MMP-10/TIMP-2 T2	25	6	0.00406571	0.00605633	0.173646	FALSE
Lymphopenia	MMP-10/TIMP-3 T1	32	14	0.0101518	0.018236	0.496268	FALSE
Lymphopenia	MMP-10/TIMP-3 T2	25	7	0.00612163	0.00608568	0.623593	FALSE
Lymphopenia	MMP-10/TIMP-4 T1	32	14	0.3901	0.79875	0.0462203	TRUE
Lymphopenia	MMP-10/TIMP-4 T2	25	7	0.4881	0.7137	0.531758	FALSE
Lymphopenia	MMP-12/TIMP-1 T1	32	14	0.000158293	0.000177119	0.218904	FALSE
Lymphopenia	MMP-12/TIMP-1 T2	25	8	0.000156348	0.00023335	0.0669604	FALSE
Lymphopenia	MMP-12/TIMP-2 T1	32	14	0.000519447	0.000454318	0.624564	FALSE
Lymphopenia	MMP-12/TIMP-2 T2	25	7	0.00058547	0.000582192	0.623593	FALSE
Lymphopenia	MMP-12/TIMP-3 T1	32	14	0.00084758	0.00074663	0.459252	FALSE
Lymphopenia	MMP-12/TIMP-3 T2	25	8	0.000508327	0.000752508	0.444714	FALSE
Lymphopenia	MMP-12/TIMP-4 T1	32	14	0.0295122	0.0397682	0.839199	FALSE
Lymphopenia	MMP-12/TIMP-4 T2	25	8	0.0412367	0.0755742	0.373769	FALSE
Lymphopenia	MMP-13/TIMP-1 T1	26	10	0.00169769	0.00347197	0.0298487	TRUE
Lymphopenia	MMP-13/TIMP-1 T2	22	6	0.00259982	0.0034679	0.722896	FALSE
Lymphopenia	MMP-13/TIMP-2 T1	26	10	0.00574993	0.00778054	0.0804174	FALSE
Lymphopenia	MMP-13/TIMP-2 T2	22	5	0.00674382	0.00743787	0.785582	FALSE
Lymphopenia	MMP-13/TIMP-3 T1	26	10	0.0140083	0.019889	0.297366	FALSE
Lymphopenia	MMP-13/TIMP-3 T2	22	6	0.011849	0.0141284	0.891607	FALSE
Lymphopenia	MMP-13/TIMP-4 T1	26	10	0.40365	0.718	0.0804174	FALSE
Lymphopenia	MMP-13/TIMP-4 T2	22	6	0.9151	0.72165	0.370279	FALSE
