# Supplementary material
Source: Research Square preprint supplement (doi:10.21203/rs.3.rs-7754190/v1)
Supplement: Supplementary file 2 [file 6a958fc80276fc59337368ff.xlsx]

## Sheet: Sheet1
Biomarker	Comparison	AUC	AUC_95CI_Lower	AUC_95CI_Upper	Sensitivity	Sens_95CI_Lower	Sens_95CI_Upper	Specificity	Spec_95CI_Lower	Spec_95CI_Upper	Optimal_Threshold	Unit	N_Group1	N_Group2	N_Total	Performance_Category	Clinical_Utility
TIMP-1 T1	MIS-C/KD vs Healthy	0.9617	0.918	1	0.915	0.801	0.966	1	0.796	1	203976	pg/mL	47	15	62	Excellent (≥0.9)	High
MMP-3 T1	MIS-C/KD vs Healthy	0.9426	0.89	0.995	0.915	0.801	0.966	0.913	0.732	0.976	3701.14	pg/mL	47	23	70	Excellent (≥0.9)	High
MMP-8 T1	MIS-C/KD vs Healthy	0.9565	0.911	1	0.891	0.77	0.953	0.917	0.742	0.977	13373.8	pg/mL	46	24	70	Excellent (≥0.9)	High
MMP-8/TIMP-2 T1	MIS-C/KD vs Healthy	0.9073	0.834	0.981	0.723	0.582	0.831	1	0.785	1	0.19		47	14	61	Excellent (≥0.9)	Moderate
TIMP-1 T1	MIS-C/KD vs Febrile	0.8729	0.799	0.947	0.745	0.605	0.847	0.951	0.839	0.987	284748	pg/mL	47	41	88	Good (0.8-0.89)	Moderate
MMP-3 T1	MIS-C/KD vs Febrile	0.8585	0.78	0.937	0.83	0.699	0.911	0.875	0.739	0.945	4472.74	pg/mL	47	40	87	Good (0.8-0.89)	Moderate
MMP-8 T1	MIS-C/KD vs Febrile	0.8627	0.785	0.94	0.761	0.621	0.861	0.854	0.716	0.931	25430.7	pg/mL	46	41	87	Good (0.8-0.89)	Moderate
MMP-8/TIMP-2 T1	MIS-C/KD vs Febrile	0.8396	0.757	0.923	0.702	0.56	0.813	0.854	0.716	0.931	0.24		47	41	88	Good (0.8-0.89)	Moderate
MMP-8/TIMP-2 T1	Healthy vs Febrile	0.8396	0.757	0.923	0.702	0.56	0.813	0.854	0.716	0.931	0.24		47	41	88	Good (0.8-0.89)	Moderate
MMP-8 T1	Healthy vs Febrile	0.8627	0.785	0.94	0.761	0.621	0.861	0.854	0.716	0.931	25430.7	pg/mL	46	41	87	Good (0.8-0.89)	Moderate
MMP-3 T1	Healthy vs Febrile	0.8585	0.78	0.937	0.83	0.699	0.911	0.875	0.739	0.945	4472.74	pg/mL	47	40	87	Good (0.8-0.89)	Moderate
TIMP-1 T1	Healthy vs Febrile	0.8729	0.799	0.947	0.745	0.605	0.847	0.951	0.839	0.987	284748	pg/mL	47	41	88	Good (0.8-0.89)	Moderate
