# Supplementary material
Source: Research Square preprint supplement (doi:10.21203/rs.3.rs-7754190/v1)
Supplement: Supplementary file 3 [file a3fec0d818b4082552832399.xlsx]

## Sheet: Arkusz1
Table S1. Components of the clinical severity score
Main Criteria	Points
1. Hemodynamic instability / shock	Stable, no fluids (0); Hypotension, fluid resuscitation (1); Shock at admission (2); Vasoactive support (3)	0–3
2. Cardiac involvement	Normal echo, no biomarkers (0); Mild LV dysfunction or ↑ troponin/BNP (1); Coronary aneurysm or moderate–severe LV dysfunction (2)	0–2
3. Respiratory support	None (0); Oxygen (nasal cannula/high-flow) (1); Non-invasive or invasive ventilation (2)	0–2
4. Neurological involvement	None (0); Encephalopathy, seizures, meningitis/encephalitis (1)	0–1
5. Gastrointestinal symptoms	None/mild (0); Severe abdominal pain, ileus, colitis, pancreatitis (1)	0–1
6. Inflammatory markers	CRP <100 & PCT <2 (0); CRP 100–199 or PCT 2–9.9 (1); CRP ≥200 or PCT ≥10 (2); CRP ≥200 and PCT ≥10 (3)	0–3
7. Coagulopathy	D-dimer <2000 & normal APTT/INR (0); D-dimer ≥2000 or prolonged APTT/INR (1); Both criteria present (2)	0–2
8. Liver / albumin	Normal AST/ALT (<2×ULN) & albumin >35 g/L (0); AST/ALT ≥2×ULN or albumin 25–35 g/L (1); AST/ALT ≥5×ULN or albumin <25 g/L (2)	0–2
9. Electrolytes	Sodium ≥135 mmol/L (0); Hyponatremia <135 mmol/L (1)	0–1
10. Lymphopenia	Lymphocytes ≥1.0×10⁹/L (0); <1.0×10⁹/L (1)	0–1
11. Prolonged fever	<5 days (0); ≥5 days despite treatment (1)	0–1
12. ICU admission	No (0); Yes (1)	0–1
Total score range: 0–20 points.
