# Supplementary material
Source: Research Square preprint supplement (doi:10.21203/rs.3.rs-7754190/v1)
Supplement: Supplementary file 4 [file b02dc0fc91c5bd348080d164.xlsx]

## Sheet: Complete_Results
Biomarker	N_Pairs	T1_Mean	T2_Mean	T1_Median	T2_Median	T1_SD	T2_SD	Mean_Difference	Percent_Change	Paired_t_statistic	Paired_t_pvalue	Wilcoxon_statistic	Wilcoxon_pvalue	Cohens_d	Effect_size_r	Significant_ttest	Significant_Wilcoxon	Cohens_d_Interpretation	Effect_size_r_Interpretation
EMMPRIN CD147	34	9790.9	6186.31	8625.79	5931.68	3981.14	2737.01	3604.59	-36.8157	5.14655	1.19748e-05	36	5.79166e-07	0.882626	0.857156	TRUE	TRUE	Large	Large
MMP-1	34	2737.56	8704.15	2017.36	8314.16	2235.3	6143.48	-5966.58	217.952	-6.79131	9.58695e-08	16	1.96742e-08	-1.1647	0.962937	TRUE	TRUE	Large	Large
MMP-1/TIMP-1	34	0.00758566	0.0234368	0.00635393	0.0214753	0.00671997	0.0155973	-0.0158512	208.962	-7.46047	1.41739e-08	6	1.62981e-09	-1.27946	1.0343	TRUE	TRUE	Large	Large
MMP-1/TIMP-2	33	0.0210786	0.0748414	0.015539	0.066984	0.0158606	0.0502427	-0.0537627	255.058	-7.56482	1.28835e-08	0	2.32831e-10	-1.31687	1.1033	TRUE	TRUE	Large	Large
MMP-1/TIMP-3	34	0.0501007	0.121593	0.0343175	0.0626927	0.0663509	0.199293	-0.0714921	142.697	-2.11035	0.0424921	48	2.82726e-06	-0.361923	0.803125	TRUE	TRUE	Small	Large
MMP-1/TIMP-4	34	1.76534	85.8469	1.35913	5.64795	2.0036	257.122	-84.0815	4762.9	-1.90654	0.0653185	17	2.4098e-08	-0.32697	0.956905	FALSE	TRUE	Small	Large
MMP-10	33	1223.62	1029.95	762.101	548.901	1113.12	1178.52	193.667	-15.8274	0.719005	0.477356	155	0.0241173	0.125163	0.39259	FALSE	TRUE	Negligible	Medium
MMP-10/TIMP-1	33	0.00338208	0.0033193	0.00211353	0.00148098	0.00367414	0.00436035	6.27822e-05	-1.85632	0.0670645	0.946948	209	0.20751	0.0116744	0.219415	FALSE	FALSE	Negligible	Small
MMP-10/TIMP-2	32	0.00830565	0.00884501	0.00623546	0.00428842	0.0059495	0.0115355	-0.000539361	6.49391	-0.233159	0.81717	157	0.045395	-0.0412171	0.353726	FALSE	TRUE	Negligible	Medium
MMP-10/TIMP-3	33	0.0246072	0.0182314	0.0105125	0.00608568	0.038105	0.0341901	0.00637583	-25.9104	0.730361	0.470483	182	0.0798486	0.12714	0.304908	FALSE	FALSE	Negligible	Medium
MMP-10/TIMP-4	33	0.729856	8.64298	0.393453	0.519494	0.65916	28.6753	-7.91312	1084.2	-1.58323	0.123203	226	0.33921	-0.275605	0.166371	FALSE	FALSE	Small	Small
MMP-12	34	68.2805	63.3101	59.9725	66.7583	42.0382	42.3492	4.97041	-7.27939	0.607583	0.547623	185	0.482209	0.1042	0.120521	FALSE	FALSE	Negligible	Small
MMP-12/TIMP-1	34	0.000184335	0.000203151	0.000163114	0.000163519	0.000105859	0.00018146	-1.88155e-05	10.2072	-0.74564	0.461163	275	0.710331	-0.127876	0.0636965	FALSE	FALSE	Negligible	Negligible
MMP-12/TIMP-2	33	0.000526562	0.000569711	0.000524837	0.000584654	0.000225473	0.00049693	-4.31494e-05	8.19455	-0.642968	0.524826	254	0.646437	-0.111926	0.0798524	FALSE	FALSE	Negligible	Negligible
MMP-12/TIMP-3	34	0.00159049	0.00122807	0.000883183	0.000531819	0.00373556	0.00315705	0.000362416	-22.7864	0.443277	0.660458	144	0.00769296	0.0760213	0.457088	FALSE	TRUE	Negligible	Medium
MMP-12/TIMP-4	34	0.0438034	0.779097	0.0327904	0.0466749	0.0340238	2.37916	-0.735293	1678.62	-1.80871	0.0796151	161	0.0186774	-0.310192	0.403349	FALSE	TRUE	Small	Medium
MMP-13	29	956.469	1233.85	981.56	810.49	542.542	1009.91	-277.386	29.001	-2.09509	0.0453309	150	0.149366	-0.389049	0.267731	TRUE	FALSE	Small	Small
MMP-13/TIMP-1	29	0.00263975	0.0032852	0.00173091	0.00271518	0.00213943	0.00247167	-0.000645443	24.4509	-1.51023	0.142189	156	0.190127	-0.280442	0.243299	FALSE	FALSE	Small	Small
MMP-13/TIMP-2	28	0.00676658	0.00929994	0.00601052	0.00674382	0.00414814	0.00732507	-0.00253336	37.4392	-2.39158	0.0240068	97	0.0145989	-0.451967	0.461529	TRUE	TRUE	Small	Medium
MMP-13/TIMP-3	29	0.0192452	0.020919	0.0170585	0.0105492	0.0145773	0.0278329	-0.00167389	8.6977	-0.397765	0.69382	204	0.781862	-0.0738631	0.0514178	FALSE	FALSE	Negligible	Negligible
MMP-13/TIMP-4	29	0.524459	3.67466	0.40928	0.727087	0.372756	9.17709	-3.1502	600.657	-1.83136	0.0777064	104	0.0129432	-0.340076	0.461514	FALSE	TRUE	Small	Medium
MMP-2	34	392285	382005	353433	348727	219966	142702	10280.4	-2.62064	0.342008	0.734514	292	0.932767	0.0586538	0.0144683	FALSE	FALSE	Negligible	Negligible
MMP-2/TIMP-1	34	1.03479	1.19464	0.824748	0.930935	0.618138	0.811603	-0.159846	15.4471	-1.2456	0.221683	226	0.227993	-0.213619	0.206749	FALSE	FALSE	Small	Small
MMP-2/TIMP-2	33	2.85285	3.08521	2.65414	2.68899	0.923202	1.00272	-0.232358	8.14477	-2.16701	0.0377859	163	0.0353429	-0.377229	0.36633	TRUE	TRUE	Small	Medium
MMP-2/TIMP-3	34	9.97377	8.83547	5.82699	4.32961	23.9405	24.5156	1.1383	-11.4129	0.195019	0.846574	173	0.0327721	0.0334454	0.366126	FALSE	TRUE	Negligible	Medium
MMP-2/TIMP-4	34	249.083	4255.66	169.715	193.782	204.06	13250.7	-4006.58	1608.53	-1.77466	0.0851807	123	0.00218312	-0.304351	0.525492	FALSE	TRUE	Small	Large
MMP-3	34	10852.2	11578.2	8383.92	8654.67	10918.7	13404.6	-725.965	6.68957	-0.555954	0.581992	297	1	-0.0953454	0	FALSE	FALSE	Negligible	Negligible
MMP-3/TIMP-1	34	0.0263017	0.0332102	0.0202466	0.0231994	0.0202611	0.0361179	-0.00690854	26.2665	-1.44454	0.158017	233	0.277755	-0.247736	0.18614	FALSE	FALSE	Small	Small
MMP-3/TIMP-2	33	0.0788933	0.0973611	0.0612022	0.0717539	0.0662171	0.106023	-0.0184678	23.4086	-1.67999	0.102698	193	0.121088	-0.292448	0.269859	FALSE	FALSE	Small	Small
MMP-3/TIMP-3	34	0.209572	0.213351	0.128792	0.0775931	0.308037	0.417462	-0.00377977	1.80357	-0.053039	0.958021	241	0.34285	-0.00909612	0.162675	FALSE	FALSE	Negligible	Small
MMP-7	34	5169.63	3658.12	4448.52	2975.6	3821.23	2836.52	1511.5	-29.2382	3.2295	0.00280551	95	0.000290827	0.553854	0.621397	TRUE	TRUE	Medium	Large
MMP-7/TIMP-1	34	0.0133877	0.0117109	0.0107274	0.00771818	0.00992025	0.0119535	0.00167674	-12.5245	1.21483	0.233052	178	0.0408248	0.208342	0.350767	FALSE	TRUE	Small	Medium
MMP-7/TIMP-2	33	0.0398751	0.0322632	0.0308811	0.0234051	0.0300343	0.0328057	0.00761188	-19.0893	2.1356	0.0404639	142	0.0122857	0.37176	0.435861	TRUE	TRUE	Small	Medium
MMP-7/TIMP-3	34	0.0945393	0.0695896	0.0755672	0.0302896	0.129934	0.161608	0.0249497	-26.3908	0.734004	0.46813	113	0.00111528	0.125881	0.559035	FALSE	TRUE	Negligible	Large
MMP-7/TIMP-4	34	2.9579	25.0237	2.49171	2.55694	2.33921	73.272	-22.0658	745.997	-1.75746	0.0881141	237	0.309202	-0.301402	0.174397	FALSE	FALSE	Small	Small
MMP-8	34	60195.6	13425.5	59364.4	8460.64	34952.1	12181.8	46770.1	-77.6968	8.70619	4.61187e-10	1	2.32831e-10	1.4931	1.08695	TRUE	TRUE	Large	Large
MMP-8/TIMP-1	34	0.171975	0.0414704	0.144579	0.0251016	0.144698	0.0503571	0.130505	-75.8858	5.26822	8.3612e-06	28	1.72644e-07	0.903492	0.896357	TRUE	TRUE	Large	Large
MMP-8/TIMP-2	33	0.492141	0.116	0.439064	0.0772777	0.335138	0.107194	0.376142	-76.4296	6.86286	9.16062e-08	6	3.25963e-09	1.19467	1.03018	TRUE	TRUE	Large	Large
MMP-8/TIMP-3	34	1.30556	0.214342	0.7759	0.0908796	2.32193	0.412202	1.09122	-83.5824	2.80914	0.00828401	5	1.16415e-09	0.481763	1.04359	TRUE	TRUE	Small	Large
MMP-8/TIMP-4	34	35.3926	52.8569	29.4955	7.62392	30.8598	146.733	-17.4643	49.3445	-0.677773	0.502641	131	0.00360935	-0.116237	0.499134	FALSE	TRUE	Negligible	Medium
MMP-9	34	458886	298570	346355	215395	373207	221498	160316	-34.936	3.34093	0.00208445	117	0.0014678	0.572965	0.545533	TRUE	TRUE	Medium	Large
MMP-9/TIMP-1	34	1.41267	0.85716	0.87837	0.614733	1.39221	0.62769	0.555505	-39.3232	2.86792	0.00714819	160	0.0177814	0.491844	0.406475	TRUE	TRUE	Small	Medium
MMP-9/TIMP-2	33	3.84556	2.53398	2.63184	2.27504	3.42651	1.79466	1.31158	-34.1063	2.78701	0.00887326	155	0.0241173	0.485156	0.39259	TRUE	TRUE	Small	Medium
MMP-9/TIMP-3	34	8.53945	5.44114	3.74865	1.93666	10.8664	14.0267	3.09831	-36.2823	1.63074	0.112455	82	9.72212e-05	0.279669	0.668403	FALSE	TRUE	Small	Large
MMP-9/TIMP-4	34	158.285	2055.09	124.337	183.337	110.8	6411.69	-1896.81	1198.35	-1.72421	0.0940275	77	0.000276793	-0.295699	0.623587	FALSE	TRUE	Small	Large
TIMP-1	34	420969	371456	363526	368992	193323	127520	49513.4	-11.7618	1.27495	0.211232	218	0.179124	0.218651	0.230401	FALSE	FALSE	Small	Small
TIMP-2	33	132612	121100	129855	116717	38986.9	22927.9	11512.2	-8.68109	1.72957	0.0933431	189	0.104543	0.30108	0.282566	FALSE	FALSE	Small	Small
TIMP-3	34	110858	129815	61795.1	93328.9	126827	117904	-18956.7	17.0999	-1.8084	0.0796651	140	0.0120584	-0.310138	0.430535	FALSE	TRUE	Small	Medium
TIMP-4	34	2029.13	1574.19	1864.16	1474.17	954.728	1186.19	454.933	-22.4201	2.21253	0.0339606	105	0.00171384	0.379445	0.537786	TRUE	TRUE	Small	Large
TNF-alpha	33	36.7033	24.5911	35.5319	15.27	26.6812	25.8159	12.1121	-33.0001	3.80637	0.000601432	89	0.00106671	0.662605	0.569637	TRUE	TRUE	Medium	Large

## Sheet: Significant_Results
Biomarker	N_Pairs	T1_Mean	T2_Mean	T1_Median	T2_Median	T1_SD	T2_SD	Mean_Difference	Percent_Change	Paired_t_statistic	Paired_t_pvalue	Wilcoxon_statistic	Wilcoxon_pvalue	Cohens_d	Effect_size_r	Significant_ttest	Significant_Wilcoxon	Cohens_d_Interpretation	Effect_size_r_Interpretation
MMP-1/TIMP-2	33	0.0210786	0.0748414	0.015539	0.066984	0.0158606	0.0502427	-0.0537627	255.058	-7.56482	1.28835e-08	0	2.32831e-10	-1.31687	1.1033	TRUE	TRUE	Large	Large
MMP-8	34	60195.6	13425.5	59364.4	8460.64	34952.1	12181.8	46770.1	-77.6968	8.70619	4.61187e-10	1	2.32831e-10	1.4931	1.08695	TRUE	TRUE	Large	Large
MMP-8/TIMP-3	34	1.30556	0.214342	0.7759	0.0908796	2.32193	0.412202	1.09122	-83.5824	2.80914	0.00828401	5	1.16415e-09	0.481763	1.04359	TRUE	TRUE	Small	Large
MMP-1/TIMP-1	34	0.00758566	0.0234368	0.00635393	0.0214753	0.00671997	0.0155973	-0.0158512	208.962	-7.46047	1.41739e-08	6	1.62981e-09	-1.27946	1.0343	TRUE	TRUE	Large	Large
MMP-8/TIMP-2	33	0.492141	0.116	0.439064	0.0772777	0.335138	0.107194	0.376142	-76.4296	6.86286	9.16062e-08	6	3.25963e-09	1.19467	1.03018	TRUE	TRUE	Large	Large
MMP-1	34	2737.56	8704.15	2017.36	8314.16	2235.3	6143.48	-5966.58	217.952	-6.79131	9.58695e-08	16	1.96742e-08	-1.1647	0.962937	TRUE	TRUE	Large	Large
MMP-1/TIMP-4	34	1.76534	85.8469	1.35913	5.64795	2.0036	257.122	-84.0815	4762.9	-1.90654	0.0653185	17	2.4098e-08	-0.32697	0.956905	FALSE	TRUE	Small	Large
MMP-8/TIMP-1	34	0.171975	0.0414704	0.144579	0.0251016	0.144698	0.0503571	0.130505	-75.8858	5.26822	8.3612e-06	28	1.72644e-07	0.903492	0.896357	TRUE	TRUE	Large	Large
EMMPRIN CD147	34	9790.9	6186.31	8625.79	5931.68	3981.14	2737.01	3604.59	-36.8157	5.14655	1.19748e-05	36	5.79166e-07	0.882626	0.857156	TRUE	TRUE	Large	Large
MMP-1/TIMP-3	34	0.0501007	0.121593	0.0343175	0.0626927	0.0663509	0.199293	-0.0714921	142.697	-2.11035	0.0424921	48	2.82726e-06	-0.361923	0.803125	TRUE	TRUE	Small	Large
MMP-9/TIMP-3	34	8.53945	5.44114	3.74865	1.93666	10.8664	14.0267	3.09831	-36.2823	1.63074	0.112455	82	9.72212e-05	0.279669	0.668403	FALSE	TRUE	Small	Large
MMP-9/TIMP-4	34	158.285	2055.09	124.337	183.337	110.8	6411.69	-1896.81	1198.35	-1.72421	0.0940275	77	0.000276793	-0.295699	0.623587	FALSE	TRUE	Small	Large
MMP-7	34	5169.63	3658.12	4448.52	2975.6	3821.23	2836.52	1511.5	-29.2382	3.2295	0.00280551	95	0.000290827	0.553854	0.621397	TRUE	TRUE	Medium	Large
TNF-alpha	33	36.7033	24.5911	35.5319	15.27	26.6812	25.8159	12.1121	-33.0001	3.80637	0.000601432	89	0.00106671	0.662605	0.569637	TRUE	TRUE	Medium	Large
MMP-7/TIMP-3	34	0.0945393	0.0695896	0.0755672	0.0302896	0.129934	0.161608	0.0249497	-26.3908	0.734004	0.46813	113	0.00111528	0.125881	0.559035	FALSE	TRUE	Negligible	Large
MMP-9	34	458886	298570	346355	215395	373207	221498	160316	-34.936	3.34093	0.00208445	117	0.0014678	0.572965	0.545533	TRUE	TRUE	Medium	Large
TIMP-4	34	2029.13	1574.19	1864.16	1474.17	954.728	1186.19	454.933	-22.4201	2.21253	0.0339606	105	0.00171384	0.379445	0.537786	TRUE	TRUE	Small	Large
MMP-2/TIMP-4	34	249.083	4255.66	169.715	193.782	204.06	13250.7	-4006.58	1608.53	-1.77466	0.0851807	123	0.00218312	-0.304351	0.525492	FALSE	TRUE	Small	Large
MMP-8/TIMP-4	34	35.3926	52.8569	29.4955	7.62392	30.8598	146.733	-17.4643	49.3445	-0.677773	0.502641	131	0.00360935	-0.116237	0.499134	FALSE	TRUE	Negligible	Medium
MMP-12/TIMP-3	34	0.00159049	0.00122807	0.000883183	0.000531819	0.00373556	0.00315705	0.000362416	-22.7864	0.443277	0.660458	144	0.00769296	0.0760213	0.457088	FALSE	TRUE	Negligible	Medium
TIMP-3	34	110858	129815	61795.1	93328.9	126827	117904	-18956.7	17.0999	-1.8084	0.0796651	140	0.0120584	-0.310138	0.430535	FALSE	TRUE	Small	Medium
MMP-7/TIMP-2	33	0.0398751	0.0322632	0.0308811	0.0234051	0.0300343	0.0328057	0.00761188	-19.0893	2.1356	0.0404639	142	0.0122857	0.37176	0.435861	TRUE	TRUE	Small	Medium
MMP-13/TIMP-4	29	0.524459	3.67466	0.40928	0.727087	0.372756	9.17709	-3.1502	600.657	-1.83136	0.0777064	104	0.0129432	-0.340076	0.461514	FALSE	TRUE	Small	Medium
MMP-13/TIMP-2	28	0.00676658	0.00929994	0.00601052	0.00674382	0.00414814	0.00732507	-0.00253336	37.4392	-2.39158	0.0240068	97	0.0145989	-0.451967	0.461529	TRUE	TRUE	Small	Medium
MMP-9/TIMP-1	34	1.41267	0.85716	0.87837	0.614733	1.39221	0.62769	0.555505	-39.3232	2.86792	0.00714819	160	0.0177814	0.491844	0.406475	TRUE	TRUE	Small	Medium
MMP-12/TIMP-4	34	0.0438034	0.779097	0.0327904	0.0466749	0.0340238	2.37916	-0.735293	1678.62	-1.80871	0.0796151	161	0.0186774	-0.310192	0.403349	FALSE	TRUE	Small	Medium
MMP-9/TIMP-2	33	3.84556	2.53398	2.63184	2.27504	3.42651	1.79466	1.31158	-34.1063	2.78701	0.00887326	155	0.0241173	0.485156	0.39259	TRUE	TRUE	Small	Medium
MMP-10	33	1223.62	1029.95	762.101	548.901	1113.12	1178.52	193.667	-15.8274	0.719005	0.477356	155	0.0241173	0.125163	0.39259	FALSE	TRUE	Negligible	Medium
MMP-2/TIMP-3	34	9.97377	8.83547	5.82699	4.32961	23.9405	24.5156	1.1383	-11.4129	0.195019	0.846574	173	0.0327721	0.0334454	0.366126	FALSE	TRUE	Negligible	Medium
MMP-2/TIMP-2	33	2.85285	3.08521	2.65414	2.68899	0.923202	1.00272	-0.232358	8.14477	-2.16701	0.0377859	163	0.0353429	-0.377229	0.36633	TRUE	TRUE	Small	Medium
MMP-7/TIMP-1	34	0.0133877	0.0117109	0.0107274	0.00771818	0.00992025	0.0119535	0.00167674	-12.5245	1.21483	0.233052	178	0.0408248	0.208342	0.350767	FALSE	TRUE	Small	Medium
MMP-10/TIMP-2	32	0.00830565	0.00884501	0.00623546	0.00428842	0.0059495	0.0115355	-0.000539361	6.49391	-0.233159	0.81717	157	0.045395	-0.0412171	0.353726	FALSE	TRUE	Negligible	Medium
MMP-13	29	956.469	1233.85	981.56	810.49	542.542	1009.91	-277.386	29.001	-2.09509	0.0453309	150	0.149366	-0.389049	0.267731	TRUE	FALSE	Small	Small

## Sheet: Important_Findings
Biomarker	N_Pairs	T1_Mean	T2_Mean	T1_Median	T2_Median	T1_SD	T2_SD	Mean_Difference	Percent_Change	Paired_t_statistic	Paired_t_pvalue	Wilcoxon_statistic	Wilcoxon_pvalue	Cohens_d	Effect_size_r	Significant_ttest	Significant_Wilcoxon	Cohens_d_Interpretation	Effect_size_r_Interpretation
MMP-1/TIMP-2	33	0.0210786	0.0748414	0.015539	0.066984	0.0158606	0.0502427	-0.0537627	255.058	-7.56482	1.28835e-08	0	2.32831e-10	-1.31687	1.1033	TRUE	TRUE	Large	Large
MMP-8	34	60195.6	13425.5	59364.4	8460.64	34952.1	12181.8	46770.1	-77.6968	8.70619	4.61187e-10	1	2.32831e-10	1.4931	1.08695	TRUE	TRUE	Large	Large
MMP-8/TIMP-3	34	1.30556	0.214342	0.7759	0.0908796	2.32193	0.412202	1.09122	-83.5824	2.80914	0.00828401	5	1.16415e-09	0.481763	1.04359	TRUE	TRUE	Small	Large
MMP-1/TIMP-1	34	0.00758566	0.0234368	0.00635393	0.0214753	0.00671997	0.0155973	-0.0158512	208.962	-7.46047	1.41739e-08	6	1.62981e-09	-1.27946	1.0343	TRUE	TRUE	Large	Large
MMP-8/TIMP-2	33	0.492141	0.116	0.439064	0.0772777	0.335138	0.107194	0.376142	-76.4296	6.86286	9.16062e-08	6	3.25963e-09	1.19467	1.03018	TRUE	TRUE	Large	Large
MMP-1	34	2737.56	8704.15	2017.36	8314.16	2235.3	6143.48	-5966.58	217.952	-6.79131	9.58695e-08	16	1.96742e-08	-1.1647	0.962937	TRUE	TRUE	Large	Large
MMP-1/TIMP-4	34	1.76534	85.8469	1.35913	5.64795	2.0036	257.122	-84.0815	4762.9	-1.90654	0.0653185	17	2.4098e-08	-0.32697	0.956905	FALSE	TRUE	Small	Large
MMP-8/TIMP-1	34	0.171975	0.0414704	0.144579	0.0251016	0.144698	0.0503571	0.130505	-75.8858	5.26822	8.3612e-06	28	1.72644e-07	0.903492	0.896357	TRUE	TRUE	Large	Large
EMMPRIN CD147	34	9790.9	6186.31	8625.79	5931.68	3981.14	2737.01	3604.59	-36.8157	5.14655	1.19748e-05	36	5.79166e-07	0.882626	0.857156	TRUE	TRUE	Large	Large
MMP-1/TIMP-3	34	0.0501007	0.121593	0.0343175	0.0626927	0.0663509	0.199293	-0.0714921	142.697	-2.11035	0.0424921	48	2.82726e-06	-0.361923	0.803125	TRUE	TRUE	Small	Large
MMP-9/TIMP-3	34	8.53945	5.44114	3.74865	1.93666	10.8664	14.0267	3.09831	-36.2823	1.63074	0.112455	82	9.72212e-05	0.279669	0.668403	FALSE	TRUE	Small	Large
MMP-9/TIMP-4	34	158.285	2055.09	124.337	183.337	110.8	6411.69	-1896.81	1198.35	-1.72421	0.0940275	77	0.000276793	-0.295699	0.623587	FALSE	TRUE	Small	Large
MMP-7	34	5169.63	3658.12	4448.52	2975.6	3821.23	2836.52	1511.5	-29.2382	3.2295	0.00280551	95	0.000290827	0.553854	0.621397	TRUE	TRUE	Medium	Large
TNF-alpha	33	36.7033	24.5911	35.5319	15.27	26.6812	25.8159	12.1121	-33.0001	3.80637	0.000601432	89	0.00106671	0.662605	0.569637	TRUE	TRUE	Medium	Large
MMP-7/TIMP-3	34	0.0945393	0.0695896	0.0755672	0.0302896	0.129934	0.161608	0.0249497	-26.3908	0.734004	0.46813	113	0.00111528	0.125881	0.559035	FALSE	TRUE	Negligible	Large
MMP-9	34	458886	298570	346355	215395	373207	221498	160316	-34.936	3.34093	0.00208445	117	0.0014678	0.572965	0.545533	TRUE	TRUE	Medium	Large
TIMP-4	34	2029.13	1574.19	1864.16	1474.17	954.728	1186.19	454.933	-22.4201	2.21253	0.0339606	105	0.00171384	0.379445	0.537786	TRUE	TRUE	Small	Large
MMP-2/TIMP-4	34	249.083	4255.66	169.715	193.782	204.06	13250.7	-4006.58	1608.53	-1.77466	0.0851807	123	0.00218312	-0.304351	0.525492	FALSE	TRUE	Small	Large
MMP-8/TIMP-4	34	35.3926	52.8569	29.4955	7.62392	30.8598	146.733	-17.4643	49.3445	-0.677773	0.502641	131	0.00360935	-0.116237	0.499134	FALSE	TRUE	Negligible	Medium
MMP-13/TIMP-2	28	0.00676658	0.00929994	0.00601052	0.00674382	0.00414814	0.00732507	-0.00253336	37.4392	-2.39158	0.0240068	97	0.0145989	-0.451967	0.461529	TRUE	TRUE	Small	Medium
MMP-13/TIMP-4	29	0.524459	3.67466	0.40928	0.727087	0.372756	9.17709	-3.1502	600.657	-1.83136	0.0777064	104	0.0129432	-0.340076	0.461514	FALSE	TRUE	Small	Medium
MMP-12/TIMP-3	34	0.00159049	0.00122807	0.000883183	0.000531819	0.00373556	0.00315705	0.000362416	-22.7864	0.443277	0.660458	144	0.00769296	0.0760213	0.457088	FALSE	TRUE	Negligible	Medium
MMP-7/TIMP-2	33	0.0398751	0.0322632	0.0308811	0.0234051	0.0300343	0.0328057	0.00761188	-19.0893	2.1356	0.0404639	142	0.0122857	0.37176	0.435861	TRUE	TRUE	Small	Medium
TIMP-3	34	110858	129815	61795.1	93328.9	126827	117904	-18956.7	17.0999	-1.8084	0.0796651	140	0.0120584	-0.310138	0.430535	FALSE	TRUE	Small	Medium
MMP-9/TIMP-1	34	1.41267	0.85716	0.87837	0.614733	1.39221	0.62769	0.555505	-39.3232	2.86792	0.00714819	160	0.0177814	0.491844	0.406475	TRUE	TRUE	Small	Medium
MMP-12/TIMP-4	34	0.0438034	0.779097	0.0327904	0.0466749	0.0340238	2.37916	-0.735293	1678.62	-1.80871	0.0796151	161	0.0186774	-0.310192	0.403349	FALSE	TRUE	Small	Medium
MMP-9/TIMP-2	33	3.84556	2.53398	2.63184	2.27504	3.42651	1.79466	1.31158	-34.1063	2.78701	0.00887326	155	0.0241173	0.485156	0.39259	TRUE	TRUE	Small	Medium
MMP-10	33	1223.62	1029.95	762.101	548.901	1113.12	1178.52	193.667	-15.8274	0.719005	0.477356	155	0.0241173	0.125163	0.39259	FALSE	TRUE	Negligible	Medium
MMP-2/TIMP-2	33	2.85285	3.08521	2.65414	2.68899	0.923202	1.00272	-0.232358	8.14477	-2.16701	0.0377859	163	0.0353429	-0.377229	0.36633	TRUE	TRUE	Small	Medium
MMP-2/TIMP-3	34	9.97377	8.83547	5.82699	4.32961	23.9405	24.5156	1.1383	-11.4129	0.195019	0.846574	173	0.0327721	0.0334454	0.366126	FALSE	TRUE	Negligible	Medium
MMP-10/TIMP-2	32	0.00830565	0.00884501	0.00623546	0.00428842	0.0059495	0.0115355	-0.000539361	6.49391	-0.233159	0.81717	157	0.045395	-0.0412171	0.353726	FALSE	TRUE	Negligible	Medium
MMP-7/TIMP-1	34	0.0133877	0.0117109	0.0107274	0.00771818	0.00992025	0.0119535	0.00167674	-12.5245	1.21483	0.233052	178	0.0408248	0.208342	0.350767	FALSE	TRUE	Small	Medium

## Sheet: Summary_Statistics
Metric	Value
Total Biomarkers Analyzed	50
Biomarkers with Significant t-test	19
Biomarkers with Significant Wilcoxon test	32
Biomarkers with Large Effect Size (r >= 0.5)	18
Biomarkers with Medium Effect Size (r >= 0.3)	33
Average Sample Size	33.2
Biomarkers Increased T1 to T2	26
Biomarkers Decreased T1 to T2	24
