# Supplementary material
Source: Research Square preprint supplement (doi:10.21203/rs.3.rs-7754190/v1)
Supplement: Supplementary file 5 [file d34af3f96e3c28c74144e502.xlsx]

## Sheet: Febrile controls
Sample number	diagnosis	Gender	age [years]	CRP serum[mg/L]	WBC blood [tys/mcL]	Lymphocytes blood[%]	Neutrophils blood [%]
638	6th disease	Male	3.53973	23.28	13.73	8	84
C108	COVID-19	Female	1,01	9.49	9.55	26	69
C110	COVID-19	Female	3,92	11.3	6.25	51.5	40
C129	COVID-19	Male	0,37	0.3	8.7	56	27
C134	COVID-19	Male	0,13	1.1	12	73	13
C136	COVID-19	Male	0,13	0.3	9.22	82	10
C158	COVID-19	Male	3,25	29.8	7.7	57.7	32
C30	COVID-19	Male	2,03	0.3	7.5	37	59
C93	COVID-19	Female	0,99	0.3	5.59	41	36
C98	COVID-19	Female	2,66	0.3	13.38	67	24
392	enterovirus meningitis	Male	10.5863	28.54	6.54	9.8	80.5
393	enterovirus meningitis	Male	10.0877	14.17	7.8	46.8	35.5
396	enterovirus meningitis	Female	7.15616	1.34	6.07	47.3	40.1
599	enterovirus meningitis	Male	3.75068	59.82	8.69	49.3	43
619	enterovirus meningitis	Male	12.3425	6.36	5.75	15.5	79
632	enterovirus meningitis	Male	8.80274	0.65	14.21	14.6	79.4
634	enterovirus meningitis	Female	6.33425	13.54	14.37	25.2	66.4
639	enterovirus meningitis	Male	6.31507	0.84	9.27	20	72
375	Gastroenteritis	Male	0.887671	1.36	10.7
434	Tick-borne encephalitis	Male	9.86027	14.58	7.41	27.3	57.7
440	Tick-borne encephalitis	Male	1.58356	11.4	18.31	21	70
442	Tick-borne encephalitis	Female	15.3534	6	11.4	3	94
449	Tick-borne encephalitis	Male	7.09315	1.04	14.2
468	Tick-borne encephalitis	Male	3.36164	11.56	19.41	9.1	76.2
504	Tick-borne encephalitis	Male	9.07671	5.48	12.82	22.8	70.1
509	Tick-borne encephalitis	Female	5.08219	0.7	14.08	67	21
510	Tick-borne encephalitis	Male	16.9397	10.61	8.2	24.4	60.8
517	Tick-borne encephalitis	Male	15.3781	6.4	11.27	12.6	81
522	Tick-borne encephalitis	Male	17.0685	6.24	12.98	10.6	83.2
527	Tick-borne encephalitis	Male	10.6	1.13	12.55	17.1	72.3
534	Tick-borne encephalitis	Female	11.5863	1.18	5.98	27.6	53
546	Tick-borne encephalitis	Female	16.6	6.77	11.75	14.3	79.9
568	Tick-borne encephalitis	Female	5.2	15.47	19.72	10.8	84.6
579	Tick-borne encephalitis	Male	7.46027	27.12	8.43	42	49
584	Tick-borne encephalitis	Male	16.3425	18.82	7.41	16.4	74.1
604	Tick-borne encephalitis	Male	10.8137	2.66	11.39	18.3	83.3
279	URTI	Male	6.54247	220.01	29.56	5	48
330	URTI	Female	12.6932	0.3	5.76	31.6	42
331	URTI	Male	3.4411	38.93	19.6
636	URTI	Male	4.0274	7.28	7.73	14	74.6
621	UTI	Female	0.0931507	89.04	13.06	28.6	54.7

## Sheet: Healthy controls
Sample_ID	Gender	Age_years
B001	Male	14.7479
B004	Female	12.1644
B005	Female	13.6466
B006	Male	12.7397
B008	Female	10.1808
B009	Female	16.1616
B010	Female	16.9205
B011	Male	13.5973
B012	Male	14.6712
B013	Male	12.7452
B015	Female	13.7096
B018	Female	12.9616
B020	Male	9.64384
B023	Male	12.5781
B025	Female	10.8849
B026	Female	2.40548
B027	Male	15.8685
B028	Female	5.3726
B029	Male	8.6274
B031	Female	7.00274
B302	Female	15.1836
B329	Male	10.8658
B342	Male	4.92603
B343	Female	8.82466
B351	Female	9.29315
B366	Female	12.9753
B370	Female	12.7041
B402	Male	12.7233
B411	Female	12.2411
B414	Male	11.211
B422	Female	8.78082
B434	Female	11.3616
600	Male	3.75068
B007	Female	16
