# Supplementary material
Source: Research Square preprint supplement (doi:10.21203/rs.3.rs-7754190/v1)
Supplement: Supplementary file 6 [file de5c687b8f147f86b178baf2.xlsx]

## Sheet: Full_BiomarkeCorrelation_Matrix
	MMP-1 T1	MMP-2 T1	MMP-3 T1	MMP-7 T1	MMP-8 T1	MMP-9 T1	MMP-10 T1	MMP-12 T1	MMP-13 T1	MMP-1/TIMP-1 T1	MMP-1/TIMP-2 T1	MMP-1/TIMP-3 T1	MMP-1/TIMP-4 T1	MMP-2/TIMP-1 T1	MMP-2/TIMP-2 T1	MMP-2/TIMP-3 T1	MMP-2/TIMP-4 T1	MMP-3/TIMP-1 T1	MMP-3/TIMP-2 T1	MMP-3/TIMP-3 T1	MMP-3/TIMP-4 T1	MMP-7/TIMP-1 T1	MMP-7/TIMP-2 T1	MMP-7/TIMP-3 T1	MMP-7/TIMP-4 T1	MMP-8/TIMP-1 T1	MMP-8/TIMP-2 T1	MMP-8/TIMP-3 T1	MMP-8/TIMP-4 T1	MMP-9/TIMP-1 T1	MMP-9/TIMP-2 T1	MMP-9/TIMP-3 T1	MMP-9/TIMP-4 T1	MMP-10/TIMP-1 T1	MMP-10/TIMP-2 T1	MMP-10/TIMP-3 T1	MMP-10/TIMP-4 T1	MMP-12/TIMP-1 T1	MMP-12/TIMP-2 T1	MMP-12/TIMP-3 T1	MMP-12/TIMP-4 T1	MMP-13/TIMP-1 T1	MMP-13/TIMP-2 T1	MMP-13/TIMP-3 T1	MMP-13/TIMP-4 T1	TIMP-1 T1	TIMP-2 T1	TIMP-3 T1	TIMP-4 T1
MMP-1 T1	1	0.27422	0.187192	-0.0667761	-0.0908593	0.226358	-0.235359	0.0441217	0.51651	0.815545	0.944171	0.826492	0.822773	0.341731	0.286066	0.243021	0.209086	0.077723	0.0719956	-0.0238553	0.163109	0.00985222	-0.117132	-0.193213	0.0301081	-0.0868137	-0.110594	-0.13191	0.00875753	0.167511	0.246373	0.135742	0.27422	-0.186097	-0.287356	-0.238643	-0.0147783	0.0859332	-0.0175151	-0.0465244	0.130816	0.411056	0.435687	0.288451	0.576355	-0.0541872	0.176793	0.0954998	-0.16913
MMP-2 T1	0.27422	1	0.377668	0.0394089	-0.360701	-0.511291	0.0645868	0.395177	0.0243869	0.154899	0.0908593	0.167488	0.504448	0.654436	0.863947	0.727422	0.793651	0.285714	0.145086	0.252811	0.70936	-0.0339354	-0.322386	-0.103996	0.415492	-0.48884	-0.562004	-0.427477	-0.0394089	-0.545504	-0.611826	-0.474548	-0.159825	-0.0350301	-0.226601	-0.0963328	0.330597	0.157088	0.125342	0.0799124	0.522715	-0.0224412	-0.165846	0.000547345	0.370553	0.236453	0.626163	0.547752	-0.500274
MMP-3 T1	0.187192	0.377668	1	0.14012	0.0711549	-0.0470781	0.229885	-0.198685	0.31018	-0.105638	0.0109469	-0.0240832	0.0147803	0.140197	0.239529	0.171319	-0.0131363	0.737822	0.920339	0.768578	0.738369	-0.226601	-0.058566	-0.102354	-0.193513	-0.184582	-0.0503696	-0.0454297	0.00930487	-0.226085	-0.146729	-0.119321	-0.0968801	-0.0503558	0.0853859	0.0563766	0.00985222	-0.37931	-0.367269	-0.331691	-0.269294	0.141215	0.218391	0.146689	0.13191	0.436782	0.411604	0.0664108	0.279146
MMP-7 T1	-0.0667761	0.0394089	0.14012	1	0.488232	0.190229	0.0870279	0.313785	-0.183313	-0.391899	-0.175698	-0.335523	-0.25455	-0.463308	-0.196003	-0.22277	-0.164204	-0.303777	0.0333972	-0.0935017	-0.0563766	0.476738	0.83908	0.685824	0.554537	0.124332	0.390638	0.268747	0.30104	-0.102094	0.0840405	-0.0530925	-0.109469	-0.259442	-0.0377668	-0.225506	-0.112753	-0.107827	0.176245	0.030104	0.0295567	-0.439518	-0.29283	-0.401752	-0.28462	0.629995	0.454297	0.365534	0.286809
MMP-8 T1	-0.0908593	-0.360701	0.0711549	0.488232	1	0.522513	0.0290093	0.148534	-0.00493219	-0.227148	-0.162014	-0.145594	-0.279184	-0.530121	-0.626335	-0.501368	-0.419814	-0.178435	0.000547495	0.0592269	-0.240285	0.177887	0.409962	0.420909	0.0708909	0.79036	0.930742	0.867542	0.750411	0.363213	0.462907	0.453202	0.351396	-0.0946907	0.118774	-0.00492611	-0.224412	-0.0169677	0.116037	0.16092	-0.137384	-0.174056	-0.0738916	-0.0437876	-0.252326	0.338807	0.110564	0.111965	0.454844
MMP-9 T1	0.226358	-0.511291	-0.0470781	0.190229	0.522513	1	-0.130286	-0.265726	0.35681	0.236486	0.271794	0.119338	-0.0886942	-0.33274	-0.625873	-0.564664	-0.550431	-0.00191597	0.0172485	-0.169066	-0.371698	0.343233	0.34898	0.068975	-0.183274	0.603807	0.629706	0.422882	0.255919	0.891185	0.967556	0.822499	0.36075	-0.0405091	-0.0509101	-0.16012	-0.307924	-0.149719	-0.283837	-0.265773	-0.439852	0.37252	0.433283	0.228548	0.0747229	-0.117148	-0.0361297	-0.10704	0.460928
MMP-10 T1	-0.235359	0.0645868	0.229885	0.0870279	0.0290093	-0.130286	1	-0.120033	0.166598	-0.259442	-0.35468	-0.250137	-0.142056	0.142388	0.0599507	0.0257252	0.116585	0.129721	0.168081	0.183439	0.253421	-0.100712	-0.0613027	-0.00328407	0.129191	-0.0366973	-0.0993704	0.0164204	0.0481664	-0.0949774	-0.185053	-0.187739	-0.101806	0.790367	0.918993	0.746032	0.762999	-0.0689655	-0.211823	-0.149973	-0.00437876	0.0755337	0.0996169	0.0235359	0.168035	0.120963	0.279693	0.0938533	0.00930487
MMP-12 T1	0.0441217	0.395177	-0.198685	0.313785	0.148534	-0.265726	-0.120033	1	-0.474002	-0.00904358	-0.0268567	-0.0131543	0.287242	0.0841788	0.288789	0.158674	0.499315	-0.316799	-0.367188	-0.229956	0.0846808	0.210469	0.114278	0.258427	0.602303	0.0479912	0.0264529	0.0164429	0.353522	-0.267096	-0.323602	-0.290765	0.0295972	-0.184982	-0.241436	-0.292409	0.137572	0.744588	0.886545	0.796109	0.844068	-0.501508	-0.613593	-0.440669	-0.129351	0.22006	0.21595	0.469772	-0.454646
MMP-13 T1	0.51651	0.0243869	0.31018	-0.183313	-0.00493219	0.35681	0.166598	-0.474002	1	0.397041	0.387725	0.446637	0.289943	0.205346	-0.0855146	0.20633	-0.134539	0.296205	0.20762	0.230336	0.0865873	-0.132895	-0.25894	-0.21592	-0.275555	-0.01796	-0.0692066	0.00109604	-0.170434	0.305974	0.291216	0.266612	0.100836	0.143581	0.0717907	0.202494	0.052884	-0.344431	-0.6853	-0.397589	-0.426086	0.867243	0.939307	0.771339	0.824223	-0.0734348	0.36964	-0.297706	0.246335
MMP-1/TIMP-1 T1	0.815545	0.154899	-0.105638	-0.391899	-0.227148	0.236486	-0.259442	-0.00904358	0.397041	1	0.877942	0.885605	0.864103	0.58598	0.309335	0.2578	0.296114	0.182813	-0.147002	-0.0896629	0.11549	0.205255	-0.307061	-0.236453	0.0416039	0.122415	-0.16069	-0.103448	0.0640394	0.419598	0.31262	0.337165	0.268747	0.110564	-0.214559	-0.0766284	0.121511	0.366721	0.0421456	0.0498084	0.226601	0.553366	0.409962	0.423645	0.604269	-0.582923	-0.145594	0.0532384	-0.386973
MMP-1/TIMP-2 T1	0.944171	0.0908593	0.0109469	-0.175698	-0.162014	0.271794	-0.35468	-0.0268567	0.387725	0.877942	1	0.829776	0.78418	0.302848	0.228306	0.127531	0.128626	0.0306513	-0.00684369	-0.158761	0.0120416	0.074439	-0.0870279	-0.234811	-0.0533735	-0.0306723	-0.0922529	-0.155446	-0.0415982	0.275352	0.344922	0.202518	0.264915	-0.187192	-0.318555	-0.287904	-0.0952381	0.14231	0.0437876	-0.044335	0.10509	0.380405	0.392447	0.217296	0.453749	-0.257252	-0.110564	-0.0150934	-0.204707
MMP-1/TIMP-3 T1	0.826492	0.167488	-0.0240832	-0.335523	-0.145594	0.119338	-0.250137	-0.0131543	0.446637	0.885605	0.829776	1	0.802518	0.429901	0.232138	0.409962	0.207991	0.143952	-0.121544	0.123115	0.1341	0.0437876	-0.287904	-0.0432403	-0.0180649	0.0870875	-0.148371	0.0755337	0.0498084	0.25154	0.189981	0.339354	0.264368	0.0197044	-0.19595	0.0717022	0.0541872	0.240285	0.0147783	0.159825	0.141762	0.501368	0.407772	0.563766	0.566502	-0.368363	-0.0405036	-0.0565315	-0.236453
MMP-1/TIMP-4 T1	0.822773	0.504448	0.0147803	-0.25455	-0.279184	-0.0886942	-0.142056	0.287242	0.289943	0.864103	0.78418	0.802518	1	0.685198	0.581246	0.453538	0.64623	0.121801	-0.141273	-0.063897	0.366224	0.0949774	-0.354728	-0.220063	0.301396	-0.10052	-0.336208	-0.237033	0.14315	0.0391459	-0.0577687	-0.0166963	0.280553	0.068975	-0.208841	-0.0719858	0.335021	0.440947	0.228548	0.199808	0.551252	0.301629	0.169153	0.241412	0.627891	-0.280827	0.134392	0.285441	-0.631723
MMP-2/TIMP-1 T1	0.341731	0.654436	0.140197	-0.463308	-0.530121	-0.33274	0.142388	0.0841788	0.205346	0.58598	0.302848	0.429901	0.685198	1	0.791838	0.662103	0.750274	0.476451	0.0377979	0.189026	0.601862	0.0794086	-0.618839	-0.340635	0.204026	-0.227154	-0.624213	-0.414567	-0.0564075	-0.0690127	-0.32676	-0.171413	-0.130887	0.420044	0.0164294	0.177437	0.527382	0.410734	0.00766703	0.0186199	0.445783	0.389923	0.124863	0.289704	0.590909	-0.503834	0.12103	0.276223	-0.641293
MMP-2/TIMP-2 T1	0.286066	0.863947	0.239529	-0.196003	-0.626335	-0.625873	0.0599507	0.288789	-0.0855146	0.309335	0.228306	0.232138	0.581246	0.791838	1	0.696414	0.827539	0.291267	0.131024	0.141114	0.645497	-0.00848618	-0.371476	-0.243909	0.320329	-0.567594	-0.72782	-0.606625	-0.210238	-0.523751	-0.635131	-0.563373	-0.277306	0.0818505	-0.148645	-0.0591295	0.414728	0.26663	0.199015	0.0591295	0.558171	-0.0188886	-0.174377	-0.0780181	0.33014	-0.062962	0.24254	0.406946	-0.660279
MMP-2/TIMP-3 T1	0.243021	0.727422	0.171319	-0.22277	-0.501368	-0.564664	0.0257252	0.158674	0.20633	0.2578	0.127531	0.409962	0.453538	0.662103	0.696414	1	0.589491	0.283525	-0.0057487	0.389362	0.528188	-0.0541872	-0.461959	0.0519978	0.146982	-0.453786	-0.692034	-0.285167	-0.264915	-0.460928	-0.610183	-0.320744	-0.199234	0.117132	-0.139573	0.22879	0.296114	0.183908	0.00437876	0.249042	0.325123	0.227696	0.060208	0.37329	0.461412	-0.0957854	0.384784	-0.00548849	-0.409414
MMP-2/TIMP-4 T1	0.209086	0.793651	-0.0131363	-0.164204	-0.419814	-0.550431	0.116585	0.499315	-0.134539	0.296114	0.128626	0.207991	0.64623	0.750274	0.827539	0.589491	1	0.104543	-0.177388	-0.0466137	0.545156	0.0656814	-0.390257	-0.19376	0.568222	-0.314391	-0.564741	-0.413246	0.151615	-0.394964	-0.571859	-0.455391	-0.0191571	0.205802	-0.06185	0.0519978	0.623974	0.483853	0.373837	0.291735	0.827039	-0.0952381	-0.30104	-0.0968801	0.379858	-0.103996	0.276957	0.516467	-0.891626
MMP-3/TIMP-1 T1	0.077723	0.285714	0.737822	-0.303777	-0.178435	-0.00191597	0.129721	-0.316799	0.296205	0.182813	0.0306513	0.143952	0.121801	0.476451	0.291267	0.283525	0.104543	1	0.752258	0.779546	0.749863	-0.0350301	-0.347564	-0.206897	-0.247981	-0.0082158	-0.203394	-0.0881226	-0.0125889	0.0884084	-0.0457159	0.152162	-0.159825	0.243569	0.0804598	0.215654	0.13191	-0.0908593	-0.378216	-0.251779	-0.199234	0.434045	0.308155	0.422551	0.273125	-0.199781	0.0596606	-0.0351264	0.0202518
MMP-3/TIMP-2 T1	0.0719956	0.145086	0.920339	0.0333972	0.000547495	0.0172485	0.168081	-0.367188	0.20762	-0.147002	-0.00684369	-0.121544	-0.141273	0.0377979	0.131024	-0.0057487	-0.177388	0.752258	1	0.718597	0.611826	-0.226663	0.00958117	-0.178757	-0.377823	-0.162717	-0.00575027	-0.0854093	-0.0977279	-0.13525	-0.0444962	-0.0673419	-0.15193	-0.0854093	0.105667	0.0057487	-0.0884205	-0.4536	-0.413359	-0.431152	-0.409526	0.108952	0.217629	0.0662469	-0.0257323	0.297837	0.115248	-0.0717817	0.330687
MMP-3/TIMP-3 T1	-0.0238553	0.252811	0.768578	-0.0935017	0.0592269	-0.169066	0.183439	-0.229956	0.230336	-0.0896629	-0.158761	0.123115	-0.063897	0.189026	0.141114	0.389362	-0.0466137	0.779546	0.718597	1	0.679464	-0.159035	-0.201536	0.14697	-0.239545	0.00836878	-0.0547176	0.24102	0.0537429	-0.157823	-0.225453	0.0940501	-0.0973405	0.107212	0.145051	0.384152	0.0548397	-0.233617	-0.321909	-0.0608721	-0.270634	0.214697	0.179874	0.45846	0.10776	0.142309	0.218262	-0.105857	0.239375
MMP-3/TIMP-4 T1	0.163109	0.70936	0.738369	-0.0563766	-0.240285	-0.371698	0.253421	0.0846808	0.0865873	0.11549	0.0120416	0.1341	0.366224	0.601862	0.645497	0.528188	0.545156	0.749863	0.611826	0.679464	1	-0.0421456	-0.294472	-0.0952381	0.189955	-0.256333	-0.390912	-0.22058	0.119321	-0.342411	-0.448125	-0.244116	-0.113848	0.195402	0.0946907	0.195402	0.412151	0.0437876	-0.0837438	-0.0563766	0.256158	0.0525452	-0.0645868	0.121511	0.262178	0.131363	0.384236	0.335073	-0.334428
MMP-7/TIMP-1 T1	0.00985222	-0.0339354	-0.226601	0.476738	0.177887	0.343233	-0.100712	0.210469	-0.132895	0.205255	0.074439	0.0437876	0.0949774	0.0794086	-0.00848618	-0.0541872	0.0656814	-0.0350301	-0.226663	-0.159035	-0.0421456	1	0.598796	0.608101	0.642671	0.425031	0.23159	0.222222	0.345375	0.416313	0.333972	0.36289	-0.111111	0.101806	-0.124247	-0.10509	0.0930487	0.326218	0.19376	0.124795	0.199234	-0.0103996	-0.107827	-0.0257252	0.028462	-0.267652	0.00930487	0.299397	-0.175698
MMP-7/TIMP-2 T1	-0.117132	-0.322386	-0.058566	0.83908	0.409962	0.34898	-0.0613027	0.114278	-0.25894	-0.307061	-0.0870279	-0.287904	-0.354728	-0.618839	-0.371476	-0.461959	-0.390257	-0.347564	0.00958117	-0.201536	-0.294472	0.598796	1	0.684729	0.393048	0.244283	0.490556	0.298851	0.206349	0.131655	0.321653	0.157635	-0.119869	-0.298851	-0.0525452	-0.25561	-0.230432	-0.155993	0.139026	-0.030104	-0.137931	-0.402299	-0.222222	-0.374384	-0.407772	0.382594	0.0328407	0.145171	0.324028
MMP-7/TIMP-3 T1	-0.193213	-0.103996	-0.102354	0.685824	0.420909	0.068975	-0.00328407	0.258427	-0.21592	-0.236453	-0.234811	-0.0432403	-0.220063	-0.340635	-0.243909	0.0519978	-0.19376	-0.206897	-0.178757	0.14697	-0.0952381	0.608101	0.684729	1	0.487204	0.351363	0.349302	0.559934	0.34428	0.0101273	0.0301122	0.229338	-0.0930487	-0.058566	0.00383142	0.129721	-0.0426929	0.090312	0.233169	0.339354	0.0350301	-0.296114	-0.279146	0.00875753	-0.254516	0.245211	0.176245	0.114435	0.216201
MMP-7/TIMP-4 T1	0.0301081	0.415492	-0.193513	0.554537	0.0708909	-0.183274	0.129191	0.602303	-0.275555	0.0416039	-0.0533735	-0.0180649	0.301396	0.204026	0.320329	0.146982	0.568222	-0.247981	-0.377823	-0.239545	0.189955	0.642671	0.393048	0.487204	1	0.0784717	-0.0342231	0.00328452	0.437936	-0.149056	-0.221218	-0.180922	-0.112221	0.114685	-0.0199808	-0.0424251	0.431093	0.437115	0.454359	0.303545	0.666484	-0.332832	-0.427809	-0.266867	0.0938826	0.122075	0.348707	0.707564	-0.516491
MMP-8/TIMP-1 T1	-0.0868137	-0.48884	-0.184582	0.124332	0.79036	0.603807	-0.0366973	0.0479912	-0.01796	0.122415	-0.0306723	0.0870875	-0.10052	-0.227154	-0.567594	-0.453786	-0.314391	-0.0082158	-0.162717	0.00836878	-0.256333	0.425031	0.244283	0.351363	0.0784717	1	0.831256	0.855265	0.765165	0.699671	0.624298	0.736136	0.316582	0.18732	0.155826	0.131727	-0.0722991	0.268109	0.146241	0.227852	-0.050938	0.0602492	0.00602492	0.180748	-0.130631	-0.250308	-0.278516	0.0367981	0.196358
MMP-8/TIMP-2 T1	-0.110594	-0.562004	-0.0503696	0.390638	0.930742	0.629706	-0.0993704	0.0264529	-0.0692066	-0.16069	-0.0922529	-0.148371	-0.336208	-0.624213	-0.72782	-0.692034	-0.564741	-0.203394	-0.00575027	-0.0547176	-0.390912	0.23159	0.490556	0.349302	-0.0342231	0.831256	1	0.821517	0.668218	0.496783	0.609803	0.552696	0.353956	-0.159047	0.0659732	-0.111142	-0.342732	-0.0558445	0.087873	0.0755543	-0.241993	-0.153299	-0.0347659	-0.0755543	-0.339447	0.183685	-0.143717	0.0348615	0.478511
MMP-8/TIMP-3 T1	-0.13191	-0.427477	-0.0454297	0.268747	0.867542	0.422882	0.0164204	0.0164429	0.00109604	-0.103448	-0.155446	0.0755337	-0.237033	-0.414567	-0.606625	-0.285167	-0.413246	-0.0881226	-0.0854093	0.24102	-0.22058	0.222222	0.298851	0.559934	0.00328452	0.855265	0.821517	1	0.69896	0.415766	0.414454	0.614122	0.334428	0.0607553	0.189381	0.279146	-0.136836	0.0344828	0.0766284	0.267652	-0.175151	-0.058566	-0.0333881	0.236453	-0.214559	0.0771757	-0.0711549	-0.0798576	0.38971
MMP-8/TIMP-4 T1	0.00875753	-0.0394089	0.00930487	0.30104	0.750411	0.255919	0.0481664	0.353522	-0.170434	0.0640394	-0.0415982	0.0498084	0.14315	-0.0564075	-0.210238	-0.264915	0.151615	-0.0125889	-0.0977279	0.0537429	0.119321	0.345375	0.206349	0.34428	0.437936	0.765165	0.668218	0.69896	1	0.279732	0.235149	0.34647	0.430761	0.130268	0.132458	0.0842912	0.194855	0.328955	0.348659	0.318555	0.355774	-0.235906	-0.301587	-0.0842912	-0.0941434	0.0782704	0.0399562	0.413558	-0.15873
MMP-9/TIMP-1 T1	0.167511	-0.545504	-0.226085	-0.102094	0.363213	0.891185	-0.0949774	-0.267096	0.305974	0.419598	0.275352	0.25154	0.0391459	-0.0690127	-0.523751	-0.460928	-0.394964	0.0884084	-0.13525	-0.157823	-0.342411	0.416313	0.131655	0.0101273	-0.149056	0.699671	0.496783	0.415766	0.279732	1	0.922382	0.887642	0.319146	0.219242	0.0457096	0.031203	-0.118243	0.112495	-0.197619	-0.133297	-0.296702	0.485562	0.423156	0.365403	0.164226	-0.504448	-0.2759	-0.139152	0.230738
MMP-9/TIMP-2 T1	0.246373	-0.611826	-0.146729	0.0840405	0.462907	0.967556	-0.185053	-0.323602	0.291216	0.31262	0.344922	0.189981	-0.0577687	-0.32676	-0.635131	-0.610183	-0.571859	-0.0457159	-0.0444962	-0.225453	-0.448125	0.333972	0.321653	0.0301122	-0.221218	0.624298	0.609803	0.414454	0.235149	0.922382	1	0.842869	0.362168	-0.0128661	-0.0413359	-0.146181	-0.318916	-0.121818	-0.24692	-0.264988	-0.44484	0.352039	0.409253	0.211059	0.0177936	-0.236792	-0.230222	-0.152073	0.422393
MMP-9/TIMP-3 T1	0.135742	-0.474548	-0.119321	-0.0530925	0.453202	0.822499	-0.187739	-0.290765	0.266612	0.337165	0.202518	0.339354	-0.0166963	-0.171413	-0.563373	-0.320744	-0.455391	0.152162	-0.0673419	0.0940501	-0.244116	0.36289	0.157635	0.229338	-0.180922	0.736136	0.552696	0.614122	0.34647	0.887642	0.842869	1	0.391352	0.0985222	-0.030104	0.0985222	-0.226054	-0.0333881	-0.241927	-0.0842912	-0.383689	0.402299	0.343733	0.507389	0.0574713	-0.340449	-0.194855	-0.146268	0.35249
MMP-9/TIMP-4 T1	0.27422	-0.159825	-0.0968801	-0.109469	0.351396	0.36075	-0.101806	0.0295972	0.100836	0.268747	0.264915	0.264368	0.280553	-0.130887	-0.277306	-0.199234	-0.0191571	-0.159825	-0.15193	-0.0973405	-0.113848	-0.111111	-0.119869	-0.0930487	-0.112221	0.316582	0.353956	0.334428	0.430761	0.319146	0.362168	0.391352	1	0.0136836	0.00875753	0.0821018	0.0509031	-0.00164204	0.0399562	0.134647	0.0711549	0.0246305	0.0454297	0.0968801	0.0558292	0.028462	0.044335	-0.0724481	-0.0793651
MMP-10/TIMP-1 T1	-0.186097	-0.0350301	-0.0503558	-0.259442	-0.0946907	-0.0405091	0.790367	-0.184982	0.143581	0.110564	-0.187192	0.0197044	0.068975	0.420044	0.0818505	0.117132	0.205802	0.243569	-0.0854093	0.107212	0.195402	0.101806	-0.298851	-0.058566	0.114685	0.18732	-0.159047	0.0607553	0.130268	0.219242	-0.0128661	0.0985222	0.0136836	1	0.833607	0.823755	0.796935	0.224412	-0.148878	-0.0262726	0.0892173	0.288998	0.141762	0.229338	0.260536	-0.430761	-0.0421456	-0.000274425	-0.214012
MMP-10/TIMP-2 T1	-0.287356	-0.226601	0.0853859	-0.0377668	0.118774	-0.0509101	0.918993	-0.241436	0.0717907	-0.214559	-0.318555	-0.19595	-0.208841	0.0164294	-0.148645	-0.139573	-0.06185	0.0804598	0.105667	0.145051	0.0946907	-0.124247	-0.0525452	0.00383142	-0.0199808	0.155826	0.0659732	0.189381	0.132458	0.0457096	-0.0413359	-0.030104	0.00875753	0.833607	1	0.822113	0.687466	-0.0503558	-0.180624	-0.110016	-0.0979748	0.0355774	0.0656814	0.0202518	0.00383142	-0.0503558	-0.0410509	-0.0738203	0.0695129
MMP-10/TIMP-3 T1	-0.238643	-0.0963328	0.0563766	-0.225506	-0.00492611	-0.16012	0.746032	-0.292409	0.202494	-0.0766284	-0.287904	0.0717022	-0.0719858	0.177437	-0.0591295	0.22879	0.0519978	0.215654	0.0057487	0.384152	0.195402	-0.10509	-0.25561	0.129721	-0.0424251	0.131727	-0.111142	0.279146	0.0842912	0.031203	-0.146181	0.0985222	0.0821018	0.823755	0.822113	1	0.680898	-0.0311987	-0.26382	0.0311987	-0.0897646	0.235906	0.173508	0.399562	0.198139	-0.19595	0.047619	-0.237652	-0.0366721
MMP-10/TIMP-4 T1	-0.0147783	0.330597	0.00985222	-0.112753	-0.224412	-0.307924	0.762999	0.137572	0.052884	0.121511	-0.0952381	0.0541872	0.335021	0.527382	0.414728	0.296114	0.623974	0.13191	-0.0884205	0.0548397	0.412151	0.0930487	-0.230432	-0.0426929	0.431093	-0.0722991	-0.342732	-0.136836	0.194855	-0.118243	-0.318916	-0.226054	0.0509031	0.796935	0.687466	0.680898	1	0.29064	0.0711549	0.110564	0.477285	0.0667761	-0.0563766	0.047619	0.366721	-0.158183	0.201423	0.256038	-0.584565
MMP-12/TIMP-1 T1	0.0859332	0.157088	-0.37931	-0.107827	-0.0169677	-0.149719	-0.0689655	0.744588	-0.344431	0.366721	0.14231	0.240285	0.440947	0.410734	0.26663	0.183908	0.483853	-0.0908593	-0.4536	-0.233617	0.0437876	0.326218	-0.155993	0.090312	0.437115	0.268109	-0.0558445	0.0344828	0.328955	0.112495	-0.121818	-0.0333881	-0.00164204	0.224412	-0.0503558	-0.0311987	0.29064	1	0.801861	0.792556	0.794745	-0.133552	-0.383689	-0.172961	0.0503558	-0.440066	-0.198139	0.237103	-0.584018
MMP-12/TIMP-2 T1	-0.0175151	0.125342	-0.367269	0.176245	0.116037	-0.283837	-0.211823	0.886545	-0.6853	0.0421456	0.0437876	0.0147783	0.228548	0.00766703	0.199015	0.00437876	0.373837	-0.378216	-0.413359	-0.321909	-0.0837438	0.19376	0.139026	0.233169	0.454359	0.146241	0.087873	0.0766284	0.348659	-0.197619	-0.24692	-0.241927	0.0399562	-0.148878	-0.180624	-0.26382	0.0711549	0.801861	1	0.829776	0.803503	-0.621237	-0.730706	-0.563218	-0.370553	0.0114943	-0.211823	0.308453	-0.462507
MMP-12/TIMP-3 T1	-0.0465244	0.0799124	-0.331691	0.030104	0.16092	-0.265773	-0.149973	0.796109	-0.397589	0.0498084	-0.044335	0.159825	0.199808	0.0186199	0.0591295	0.249042	0.291735	-0.251779	-0.431152	-0.0608721	-0.0563766	0.124795	-0.030104	0.339354	0.303545	0.227852	0.0755543	0.267652	0.318555	-0.133297	-0.264988	-0.0842912	0.134647	-0.0262726	-0.110016	0.0311987	0.110564	0.792556	0.829776	1	0.684182	-0.329502	-0.470717	-0.152162	-0.143952	-0.0678708	-0.0853859	-0.00987929	-0.374932
MMP-12/TIMP-4 T1	0.130816	0.522715	-0.269294	0.0295567	-0.137384	-0.439852	-0.00437876	0.844068	-0.426086	0.226601	0.10509	0.141762	0.551252	0.445783	0.558171	0.325123	0.827039	-0.199234	-0.409526	-0.270634	0.256158	0.199234	-0.137931	0.0350301	0.666484	-0.050938	-0.241993	-0.175151	0.355774	-0.296702	-0.44484	-0.383689	0.0711549	0.0892173	-0.0979748	-0.0897646	0.477285	0.794745	0.803503	0.684182	1	-0.3815	-0.567597	-0.368363	0.0793651	-0.0684182	0.091954	0.506863	-0.84127
MMP-13/TIMP-1 T1	0.411056	-0.0224412	0.141215	-0.439518	-0.174056	0.37252	0.0755337	-0.501508	0.867243	0.553366	0.380405	0.501368	0.301629	0.389923	-0.0188886	0.227696	-0.0952381	0.434045	0.108952	0.214697	0.0525452	-0.0103996	-0.402299	-0.296114	-0.332832	0.0602492	-0.153299	-0.058566	-0.235906	0.485562	0.352039	0.402299	0.0246305	0.288998	0.0355774	0.235906	0.0667761	-0.133552	-0.621237	-0.329502	-0.3815	1	0.925014	0.836344	0.812808	-0.474548	0.131363	-0.330407	0.125342
MMP-13/TIMP-2 T1	0.435687	-0.165846	0.218391	-0.29283	-0.0738916	0.433283	0.0996169	-0.613593	0.939307	0.409962	0.392447	0.407772	0.169153	0.124863	-0.174377	0.060208	-0.30104	0.308155	0.217629	0.179874	-0.0645868	-0.107827	-0.222222	-0.279146	-0.427809	0.00602492	-0.0347659	-0.0333881	-0.301587	0.423156	0.409253	0.343733	0.0454297	0.141762	0.0656814	0.173508	-0.0563766	-0.383689	-0.730706	-0.470717	-0.567597	0.925014	1	0.761905	0.737274	-0.235906	0.148878	-0.419047	0.324576
MMP-13/TIMP-3 T1	0.288451	0.000547345	0.146689	-0.401752	-0.0437876	0.228548	0.0235359	-0.440669	0.771339	0.423645	0.217296	0.563766	0.241412	0.289704	-0.0780181	0.37329	-0.0968801	0.422551	0.0662469	0.45846	0.121511	-0.0257252	-0.374384	0.00875753	-0.266867	0.180748	-0.0755543	0.236453	-0.0842912	0.365403	0.211059	0.507389	0.0968801	0.229338	0.0202518	0.399562	0.047619	-0.172961	-0.563218	-0.152162	-0.368363	0.836344	0.761905	1	0.685824	-0.338807	0.14231	-0.325468	0.16913
MMP-13/TIMP-4 T1	0.576355	0.370553	0.13191	-0.28462	-0.252326	0.0747229	0.168035	-0.129351	0.824223	0.604269	0.453749	0.566502	0.627891	0.590909	0.33014	0.461412	0.379858	0.273125	-0.0257323	0.10776	0.262178	0.028462	-0.407772	-0.254516	0.0938826	-0.130631	-0.339447	-0.214559	-0.0941434	0.164226	0.0177936	0.0574713	0.0558292	0.260536	0.00383142	0.198139	0.366721	0.0503558	-0.370553	-0.143952	0.0793651	0.812808	0.737274	0.685824	1	-0.267105	0.41653	0.00246982	-0.280241
TIMP-1 T1	-0.0541872	0.236453	0.436782	0.629995	0.338807	-0.117148	0.120963	0.22006	-0.0734348	-0.582923	-0.257252	-0.368363	-0.280827	-0.503834	-0.062962	-0.0957854	-0.103996	-0.199781	0.297837	0.142309	0.131363	-0.267652	0.382594	0.245211	0.122075	-0.250308	0.183685	0.0771757	0.0782704	-0.504448	-0.236792	-0.340449	0.028462	-0.430761	-0.0503558	-0.19595	-0.158183	-0.440066	0.0114943	-0.0678708	-0.0684182	-0.474548	-0.235906	-0.338807	-0.267105	1	0.576355	0.235731	0.343733
TIMP-2 T1	0.176793	0.626163	0.411604	0.454297	0.110564	-0.0361297	0.279693	0.21595	0.36964	-0.145594	-0.110564	-0.0405036	0.134392	0.12103	0.24254	0.384784	0.276957	0.0596606	0.115248	0.218262	0.384236	0.00930487	0.0328407	0.176245	0.348707	-0.278516	-0.143717	-0.0711549	0.0399562	-0.2759	-0.230222	-0.194855	0.044335	-0.0421456	-0.0410509	0.047619	0.201423	-0.198139	-0.211823	-0.0853859	0.091954	0.131363	0.148878	0.14231	0.41653	0.576355	1	0.343031	0.0410509
TIMP-3 T1	0.0954998	0.547752	0.0664108	0.365534	0.111965	-0.10704	0.0938533	0.469772	-0.297706	0.0532384	-0.0150934	-0.0565315	0.285441	0.276223	0.406946	-0.00548849	0.516467	-0.0351264	-0.0717817	-0.105857	0.335073	0.299397	0.145171	0.114435	0.707564	0.0367981	0.0348615	-0.0798576	0.413558	-0.139152	-0.152073	-0.146268	-0.0724481	-0.000274425	-0.0738203	-0.237652	0.256038	0.237103	0.308453	-0.00987929	0.506863	-0.330407	-0.419047	-0.325468	0.00246982	0.235731	0.343031	1	-0.340561
TIMP-4 T1	-0.16913	-0.500274	0.279146	0.286809	0.454844	0.460928	0.00930487	-0.454646	0.246335	-0.386973	-0.204707	-0.236453	-0.631723	-0.641293	-0.660279	-0.409414	-0.891626	0.0202518	0.330687	0.239375	-0.334428	-0.175698	0.324028	0.216201	-0.516491	0.196358	0.478511	0.38971	-0.15873	0.230738	0.422393	0.35249	-0.0793651	-0.214012	0.0695129	-0.0366721	-0.584565	-0.584018	-0.462507	-0.374932	-0.84127	0.125342	0.324576	0.16913	-0.280241	0.343733	0.0410509	-0.340561	1
MMP-1/TIMP-1 T1	0.815545	0.154899	-0.105638	-0.391899	-0.227148	0.236486	-0.259442	-0.00904358	0.397041	1	0.877942	0.885605	0.864103	0.58598	0.309335	0.2578	0.296114	0.182813	-0.147002	-0.0896629	0.11549	0.205255	-0.307061	-0.236453	0.0416039	0.122415	-0.16069	-0.103448	0.0640394	0.419598	0.31262	0.337165	0.268747	0.110564	-0.214559	-0.0766284	0.121511	0.366721	0.0421456	0.0498084	0.226601	0.553366	0.409962	0.423645	0.604269	-0.582923	-0.145594	0.0532384	-0.386973
MMP-1/TIMP-2 T1	0.944171	0.0908593	0.0109469	-0.175698	-0.162014	0.271794	-0.35468	-0.0268567	0.387725	0.877942	1	0.829776	0.78418	0.302848	0.228306	0.127531	0.128626	0.0306513	-0.00684369	-0.158761	0.0120416	0.074439	-0.0870279	-0.234811	-0.0533735	-0.0306723	-0.0922529	-0.155446	-0.0415982	0.275352	0.344922	0.202518	0.264915	-0.187192	-0.318555	-0.287904	-0.0952381	0.14231	0.0437876	-0.044335	0.10509	0.380405	0.392447	0.217296	0.453749	-0.257252	-0.110564	-0.0150934	-0.204707
MMP-1/TIMP-3 T1	0.826492	0.167488	-0.0240832	-0.335523	-0.145594	0.119338	-0.250137	-0.0131543	0.446637	0.885605	0.829776	1	0.802518	0.429901	0.232138	0.409962	0.207991	0.143952	-0.121544	0.123115	0.1341	0.0437876	-0.287904	-0.0432403	-0.0180649	0.0870875	-0.148371	0.0755337	0.0498084	0.25154	0.189981	0.339354	0.264368	0.0197044	-0.19595	0.0717022	0.0541872	0.240285	0.0147783	0.159825	0.141762	0.501368	0.407772	0.563766	0.566502	-0.368363	-0.0405036	-0.0565315	-0.236453
MMP-1/TIMP-4 T1	0.822773	0.504448	0.0147803	-0.25455	-0.279184	-0.0886942	-0.142056	0.287242	0.289943	0.864103	0.78418	0.802518	1	0.685198	0.581246	0.453538	0.64623	0.121801	-0.141273	-0.063897	0.366224	0.0949774	-0.354728	-0.220063	0.301396	-0.10052	-0.336208	-0.237033	0.14315	0.0391459	-0.0577687	-0.0166963	0.280553	0.068975	-0.208841	-0.0719858	0.335021	0.440947	0.228548	0.199808	0.551252	0.301629	0.169153	0.241412	0.627891	-0.280827	0.134392	0.285441	-0.631723
MMP-2/TIMP-1 T1	0.341731	0.654436	0.140197	-0.463308	-0.530121	-0.33274	0.142388	0.0841788	0.205346	0.58598	0.302848	0.429901	0.685198	1	0.791838	0.662103	0.750274	0.476451	0.0377979	0.189026	0.601862	0.0794086	-0.618839	-0.340635	0.204026	-0.227154	-0.624213	-0.414567	-0.0564075	-0.0690127	-0.32676	-0.171413	-0.130887	0.420044	0.0164294	0.177437	0.527382	0.410734	0.00766703	0.0186199	0.445783	0.389923	0.124863	0.289704	0.590909	-0.503834	0.12103	0.276223	-0.641293
MMP-2/TIMP-2 T1	0.286066	0.863947	0.239529	-0.196003	-0.626335	-0.625873	0.0599507	0.288789	-0.0855146	0.309335	0.228306	0.232138	0.581246	0.791838	1	0.696414	0.827539	0.291267	0.131024	0.141114	0.645497	-0.00848618	-0.371476	-0.243909	0.320329	-0.567594	-0.72782	-0.606625	-0.210238	-0.523751	-0.635131	-0.563373	-0.277306	0.0818505	-0.148645	-0.0591295	0.414728	0.26663	0.199015	0.0591295	0.558171	-0.0188886	-0.174377	-0.0780181	0.33014	-0.062962	0.24254	0.406946	-0.660279
MMP-2/TIMP-3 T1	0.243021	0.727422	0.171319	-0.22277	-0.501368	-0.564664	0.0257252	0.158674	0.20633	0.2578	0.127531	0.409962	0.453538	0.662103	0.696414	1	0.589491	0.283525	-0.0057487	0.389362	0.528188	-0.0541872	-0.461959	0.0519978	0.146982	-0.453786	-0.692034	-0.285167	-0.264915	-0.460928	-0.610183	-0.320744	-0.199234	0.117132	-0.139573	0.22879	0.296114	0.183908	0.00437876	0.249042	0.325123	0.227696	0.060208	0.37329	0.461412	-0.0957854	0.384784	-0.00548849	-0.409414
MMP-2/TIMP-4 T1	0.209086	0.793651	-0.0131363	-0.164204	-0.419814	-0.550431	0.116585	0.499315	-0.134539	0.296114	0.128626	0.207991	0.64623	0.750274	0.827539	0.589491	1	0.104543	-0.177388	-0.0466137	0.545156	0.0656814	-0.390257	-0.19376	0.568222	-0.314391	-0.564741	-0.413246	0.151615	-0.394964	-0.571859	-0.455391	-0.0191571	0.205802	-0.06185	0.0519978	0.623974	0.483853	0.373837	0.291735	0.827039	-0.0952381	-0.30104	-0.0968801	0.379858	-0.103996	0.276957	0.516467	-0.891626
MMP-3/TIMP-1 T1	0.077723	0.285714	0.737822	-0.303777	-0.178435	-0.00191597	0.129721	-0.316799	0.296205	0.182813	0.0306513	0.143952	0.121801	0.476451	0.291267	0.283525	0.104543	1	0.752258	0.779546	0.749863	-0.0350301	-0.347564	-0.206897	-0.247981	-0.0082158	-0.203394	-0.0881226	-0.0125889	0.0884084	-0.0457159	0.152162	-0.159825	0.243569	0.0804598	0.215654	0.13191	-0.0908593	-0.378216	-0.251779	-0.199234	0.434045	0.308155	0.422551	0.273125	-0.199781	0.0596606	-0.0351264	0.0202518
MMP-3/TIMP-2 T1	0.0719956	0.145086	0.920339	0.0333972	0.000547495	0.0172485	0.168081	-0.367188	0.20762	-0.147002	-0.00684369	-0.121544	-0.141273	0.0377979	0.131024	-0.0057487	-0.177388	0.752258	1	0.718597	0.611826	-0.226663	0.00958117	-0.178757	-0.377823	-0.162717	-0.00575027	-0.0854093	-0.0977279	-0.13525	-0.0444962	-0.0673419	-0.15193	-0.0854093	0.105667	0.0057487	-0.0884205	-0.4536	-0.413359	-0.431152	-0.409526	0.108952	0.217629	0.0662469	-0.0257323	0.297837	0.115248	-0.0717817	0.330687
MMP-3/TIMP-3 T1	-0.0238553	0.252811	0.768578	-0.0935017	0.0592269	-0.169066	0.183439	-0.229956	0.230336	-0.0896629	-0.158761	0.123115	-0.063897	0.189026	0.141114	0.389362	-0.0466137	0.779546	0.718597	1	0.679464	-0.159035	-0.201536	0.14697	-0.239545	0.00836878	-0.0547176	0.24102	0.0537429	-0.157823	-0.225453	0.0940501	-0.0973405	0.107212	0.145051	0.384152	0.0548397	-0.233617	-0.321909	-0.0608721	-0.270634	0.214697	0.179874	0.45846	0.10776	0.142309	0.218262	-0.105857	0.239375
MMP-3/TIMP-4 T1	0.163109	0.70936	0.738369	-0.0563766	-0.240285	-0.371698	0.253421	0.0846808	0.0865873	0.11549	0.0120416	0.1341	0.366224	0.601862	0.645497	0.528188	0.545156	0.749863	0.611826	0.679464	1	-0.0421456	-0.294472	-0.0952381	0.189955	-0.256333	-0.390912	-0.22058	0.119321	-0.342411	-0.448125	-0.244116	-0.113848	0.195402	0.0946907	0.195402	0.412151	0.0437876	-0.0837438	-0.0563766	0.256158	0.0525452	-0.0645868	0.121511	0.262178	0.131363	0.384236	0.335073	-0.334428
MMP-7/TIMP-1 T1	0.00985222	-0.0339354	-0.226601	0.476738	0.177887	0.343233	-0.100712	0.210469	-0.132895	0.205255	0.074439	0.0437876	0.0949774	0.0794086	-0.00848618	-0.0541872	0.0656814	-0.0350301	-0.226663	-0.159035	-0.0421456	1	0.598796	0.608101	0.642671	0.425031	0.23159	0.222222	0.345375	0.416313	0.333972	0.36289	-0.111111	0.101806	-0.124247	-0.10509	0.0930487	0.326218	0.19376	0.124795	0.199234	-0.0103996	-0.107827	-0.0257252	0.028462	-0.267652	0.00930487	0.299397	-0.175698
MMP-7/TIMP-2 T1	-0.117132	-0.322386	-0.058566	0.83908	0.409962	0.34898	-0.0613027	0.114278	-0.25894	-0.307061	-0.0870279	-0.287904	-0.354728	-0.618839	-0.371476	-0.461959	-0.390257	-0.347564	0.00958117	-0.201536	-0.294472	0.598796	1	0.684729	0.393048	0.244283	0.490556	0.298851	0.206349	0.131655	0.321653	0.157635	-0.119869	-0.298851	-0.0525452	-0.25561	-0.230432	-0.155993	0.139026	-0.030104	-0.137931	-0.402299	-0.222222	-0.374384	-0.407772	0.382594	0.0328407	0.145171	0.324028
MMP-7/TIMP-3 T1	-0.193213	-0.103996	-0.102354	0.685824	0.420909	0.068975	-0.00328407	0.258427	-0.21592	-0.236453	-0.234811	-0.0432403	-0.220063	-0.340635	-0.243909	0.0519978	-0.19376	-0.206897	-0.178757	0.14697	-0.0952381	0.608101	0.684729	1	0.487204	0.351363	0.349302	0.559934	0.34428	0.0101273	0.0301122	0.229338	-0.0930487	-0.058566	0.00383142	0.129721	-0.0426929	0.090312	0.233169	0.339354	0.0350301	-0.296114	-0.279146	0.00875753	-0.254516	0.245211	0.176245	0.114435	0.216201
MMP-7/TIMP-4 T1	0.0301081	0.415492	-0.193513	0.554537	0.0708909	-0.183274	0.129191	0.602303	-0.275555	0.0416039	-0.0533735	-0.0180649	0.301396	0.204026	0.320329	0.146982	0.568222	-0.247981	-0.377823	-0.239545	0.189955	0.642671	0.393048	0.487204	1	0.0784717	-0.0342231	0.00328452	0.437936	-0.149056	-0.221218	-0.180922	-0.112221	0.114685	-0.0199808	-0.0424251	0.431093	0.437115	0.454359	0.303545	0.666484	-0.332832	-0.427809	-0.266867	0.0938826	0.122075	0.348707	0.707564	-0.516491
MMP-8/TIMP-1 T1	-0.0868137	-0.48884	-0.184582	0.124332	0.79036	0.603807	-0.0366973	0.0479912	-0.01796	0.122415	-0.0306723	0.0870875	-0.10052	-0.227154	-0.567594	-0.453786	-0.314391	-0.0082158	-0.162717	0.00836878	-0.256333	0.425031	0.244283	0.351363	0.0784717	1	0.831256	0.855265	0.765165	0.699671	0.624298	0.736136	0.316582	0.18732	0.155826	0.131727	-0.0722991	0.268109	0.146241	0.227852	-0.050938	0.0602492	0.00602492	0.180748	-0.130631	-0.250308	-0.278516	0.0367981	0.196358
MMP-8/TIMP-2 T1	-0.110594	-0.562004	-0.0503696	0.390638	0.930742	0.629706	-0.0993704	0.0264529	-0.0692066	-0.16069	-0.0922529	-0.148371	-0.336208	-0.624213	-0.72782	-0.692034	-0.564741	-0.203394	-0.00575027	-0.0547176	-0.390912	0.23159	0.490556	0.349302	-0.0342231	0.831256	1	0.821517	0.668218	0.496783	0.609803	0.552696	0.353956	-0.159047	0.0659732	-0.111142	-0.342732	-0.0558445	0.087873	0.0755543	-0.241993	-0.153299	-0.0347659	-0.0755543	-0.339447	0.183685	-0.143717	0.0348615	0.478511
MMP-8/TIMP-3 T1	-0.13191	-0.427477	-0.0454297	0.268747	0.867542	0.422882	0.0164204	0.0164429	0.00109604	-0.103448	-0.155446	0.0755337	-0.237033	-0.414567	-0.606625	-0.285167	-0.413246	-0.0881226	-0.0854093	0.24102	-0.22058	0.222222	0.298851	0.559934	0.00328452	0.855265	0.821517	1	0.69896	0.415766	0.414454	0.614122	0.334428	0.0607553	0.189381	0.279146	-0.136836	0.0344828	0.0766284	0.267652	-0.175151	-0.058566	-0.0333881	0.236453	-0.214559	0.0771757	-0.0711549	-0.0798576	0.38971
MMP-8/TIMP-4 T1	0.00875753	-0.0394089	0.00930487	0.30104	0.750411	0.255919	0.0481664	0.353522	-0.170434	0.0640394	-0.0415982	0.0498084	0.14315	-0.0564075	-0.210238	-0.264915	0.151615	-0.0125889	-0.0977279	0.0537429	0.119321	0.345375	0.206349	0.34428	0.437936	0.765165	0.668218	0.69896	1	0.279732	0.235149	0.34647	0.430761	0.130268	0.132458	0.0842912	0.194855	0.328955	0.348659	0.318555	0.355774	-0.235906	-0.301587	-0.0842912	-0.0941434	0.0782704	0.0399562	0.413558	-0.15873
MMP-9/TIMP-1 T1	0.167511	-0.545504	-0.226085	-0.102094	0.363213	0.891185	-0.0949774	-0.267096	0.305974	0.419598	0.275352	0.25154	0.0391459	-0.0690127	-0.523751	-0.460928	-0.394964	0.0884084	-0.13525	-0.157823	-0.342411	0.416313	0.131655	0.0101273	-0.149056	0.699671	0.496783	0.415766	0.279732	1	0.922382	0.887642	0.319146	0.219242	0.0457096	0.031203	-0.118243	0.112495	-0.197619	-0.133297	-0.296702	0.485562	0.423156	0.365403	0.164226	-0.504448	-0.2759	-0.139152	0.230738
MMP-9/TIMP-2 T1	0.246373	-0.611826	-0.146729	0.0840405	0.462907	0.967556	-0.185053	-0.323602	0.291216	0.31262	0.344922	0.189981	-0.0577687	-0.32676	-0.635131	-0.610183	-0.571859	-0.0457159	-0.0444962	-0.225453	-0.448125	0.333972	0.321653	0.0301122	-0.221218	0.624298	0.609803	0.414454	0.235149	0.922382	1	0.842869	0.362168	-0.0128661	-0.0413359	-0.146181	-0.318916	-0.121818	-0.24692	-0.264988	-0.44484	0.352039	0.409253	0.211059	0.0177936	-0.236792	-0.230222	-0.152073	0.422393
MMP-9/TIMP-3 T1	0.135742	-0.474548	-0.119321	-0.0530925	0.453202	0.822499	-0.187739	-0.290765	0.266612	0.337165	0.202518	0.339354	-0.0166963	-0.171413	-0.563373	-0.320744	-0.455391	0.152162	-0.0673419	0.0940501	-0.244116	0.36289	0.157635	0.229338	-0.180922	0.736136	0.552696	0.614122	0.34647	0.887642	0.842869	1	0.391352	0.0985222	-0.030104	0.0985222	-0.226054	-0.0333881	-0.241927	-0.0842912	-0.383689	0.402299	0.343733	0.507389	0.0574713	-0.340449	-0.194855	-0.146268	0.35249
MMP-9/TIMP-4 T1	0.27422	-0.159825	-0.0968801	-0.109469	0.351396	0.36075	-0.101806	0.0295972	0.100836	0.268747	0.264915	0.264368	0.280553	-0.130887	-0.277306	-0.199234	-0.0191571	-0.159825	-0.15193	-0.0973405	-0.113848	-0.111111	-0.119869	-0.0930487	-0.112221	0.316582	0.353956	0.334428	0.430761	0.319146	0.362168	0.391352	1	0.0136836	0.00875753	0.0821018	0.0509031	-0.00164204	0.0399562	0.134647	0.0711549	0.0246305	0.0454297	0.0968801	0.0558292	0.028462	0.044335	-0.0724481	-0.0793651
MMP-10/TIMP-1 T1	-0.186097	-0.0350301	-0.0503558	-0.259442	-0.0946907	-0.0405091	0.790367	-0.184982	0.143581	0.110564	-0.187192	0.0197044	0.068975	0.420044	0.0818505	0.117132	0.205802	0.243569	-0.0854093	0.107212	0.195402	0.101806	-0.298851	-0.058566	0.114685	0.18732	-0.159047	0.0607553	0.130268	0.219242	-0.0128661	0.0985222	0.0136836	1	0.833607	0.823755	0.796935	0.224412	-0.148878	-0.0262726	0.0892173	0.288998	0.141762	0.229338	0.260536	-0.430761	-0.0421456	-0.000274425	-0.214012
MMP-10/TIMP-2 T1	-0.287356	-0.226601	0.0853859	-0.0377668	0.118774	-0.0509101	0.918993	-0.241436	0.0717907	-0.214559	-0.318555	-0.19595	-0.208841	0.0164294	-0.148645	-0.139573	-0.06185	0.0804598	0.105667	0.145051	0.0946907	-0.124247	-0.0525452	0.00383142	-0.0199808	0.155826	0.0659732	0.189381	0.132458	0.0457096	-0.0413359	-0.030104	0.00875753	0.833607	1	0.822113	0.687466	-0.0503558	-0.180624	-0.110016	-0.0979748	0.0355774	0.0656814	0.0202518	0.00383142	-0.0503558	-0.0410509	-0.0738203	0.0695129
MMP-10/TIMP-3 T1	-0.238643	-0.0963328	0.0563766	-0.225506	-0.00492611	-0.16012	0.746032	-0.292409	0.202494	-0.0766284	-0.287904	0.0717022	-0.0719858	0.177437	-0.0591295	0.22879	0.0519978	0.215654	0.0057487	0.384152	0.195402	-0.10509	-0.25561	0.129721	-0.0424251	0.131727	-0.111142	0.279146	0.0842912	0.031203	-0.146181	0.0985222	0.0821018	0.823755	0.822113	1	0.680898	-0.0311987	-0.26382	0.0311987	-0.0897646	0.235906	0.173508	0.399562	0.198139	-0.19595	0.047619	-0.237652	-0.0366721
MMP-10/TIMP-4 T1	-0.0147783	0.330597	0.00985222	-0.112753	-0.224412	-0.307924	0.762999	0.137572	0.052884	0.121511	-0.0952381	0.0541872	0.335021	0.527382	0.414728	0.296114	0.623974	0.13191	-0.0884205	0.0548397	0.412151	0.0930487	-0.230432	-0.0426929	0.431093	-0.0722991	-0.342732	-0.136836	0.194855	-0.118243	-0.318916	-0.226054	0.0509031	0.796935	0.687466	0.680898	1	0.29064	0.0711549	0.110564	0.477285	0.0667761	-0.0563766	0.047619	0.366721	-0.158183	0.201423	0.256038	-0.584565
MMP-12/TIMP-1 T1	0.0859332	0.157088	-0.37931	-0.107827	-0.0169677	-0.149719	-0.0689655	0.744588	-0.344431	0.366721	0.14231	0.240285	0.440947	0.410734	0.26663	0.183908	0.483853	-0.0908593	-0.4536	-0.233617	0.0437876	0.326218	-0.155993	0.090312	0.437115	0.268109	-0.0558445	0.0344828	0.328955	0.112495	-0.121818	-0.0333881	-0.00164204	0.224412	-0.0503558	-0.0311987	0.29064	1	0.801861	0.792556	0.794745	-0.133552	-0.383689	-0.172961	0.0503558	-0.440066	-0.198139	0.237103	-0.584018
MMP-12/TIMP-2 T1	-0.0175151	0.125342	-0.367269	0.176245	0.116037	-0.283837	-0.211823	0.886545	-0.6853	0.0421456	0.0437876	0.0147783	0.228548	0.00766703	0.199015	0.00437876	0.373837	-0.378216	-0.413359	-0.321909	-0.0837438	0.19376	0.139026	0.233169	0.454359	0.146241	0.087873	0.0766284	0.348659	-0.197619	-0.24692	-0.241927	0.0399562	-0.148878	-0.180624	-0.26382	0.0711549	0.801861	1	0.829776	0.803503	-0.621237	-0.730706	-0.563218	-0.370553	0.0114943	-0.211823	0.308453	-0.462507
MMP-12/TIMP-3 T1	-0.0465244	0.0799124	-0.331691	0.030104	0.16092	-0.265773	-0.149973	0.796109	-0.397589	0.0498084	-0.044335	0.159825	0.199808	0.0186199	0.0591295	0.249042	0.291735	-0.251779	-0.431152	-0.0608721	-0.0563766	0.124795	-0.030104	0.339354	0.303545	0.227852	0.0755543	0.267652	0.318555	-0.133297	-0.264988	-0.0842912	0.134647	-0.0262726	-0.110016	0.0311987	0.110564	0.792556	0.829776	1	0.684182	-0.329502	-0.470717	-0.152162	-0.143952	-0.0678708	-0.0853859	-0.00987929	-0.374932
MMP-12/TIMP-4 T1	0.130816	0.522715	-0.269294	0.0295567	-0.137384	-0.439852	-0.00437876	0.844068	-0.426086	0.226601	0.10509	0.141762	0.551252	0.445783	0.558171	0.325123	0.827039	-0.199234	-0.409526	-0.270634	0.256158	0.199234	-0.137931	0.0350301	0.666484	-0.050938	-0.241993	-0.175151	0.355774	-0.296702	-0.44484	-0.383689	0.0711549	0.0892173	-0.0979748	-0.0897646	0.477285	0.794745	0.803503	0.684182	1	-0.3815	-0.567597	-0.368363	0.0793651	-0.0684182	0.091954	0.506863	-0.84127
MMP-13/TIMP-1 T1	0.411056	-0.0224412	0.141215	-0.439518	-0.174056	0.37252	0.0755337	-0.501508	0.867243	0.553366	0.380405	0.501368	0.301629	0.389923	-0.0188886	0.227696	-0.0952381	0.434045	0.108952	0.214697	0.0525452	-0.0103996	-0.402299	-0.296114	-0.332832	0.0602492	-0.153299	-0.058566	-0.235906	0.485562	0.352039	0.402299	0.0246305	0.288998	0.0355774	0.235906	0.0667761	-0.133552	-0.621237	-0.329502	-0.3815	1	0.925014	0.836344	0.812808	-0.474548	0.131363	-0.330407	0.125342
MMP-13/TIMP-2 T1	0.435687	-0.165846	0.218391	-0.29283	-0.0738916	0.433283	0.0996169	-0.613593	0.939307	0.409962	0.392447	0.407772	0.169153	0.124863	-0.174377	0.060208	-0.30104	0.308155	0.217629	0.179874	-0.0645868	-0.107827	-0.222222	-0.279146	-0.427809	0.00602492	-0.0347659	-0.0333881	-0.301587	0.423156	0.409253	0.343733	0.0454297	0.141762	0.0656814	0.173508	-0.0563766	-0.383689	-0.730706	-0.470717	-0.567597	0.925014	1	0.761905	0.737274	-0.235906	0.148878	-0.419047	0.324576
MMP-13/TIMP-3 T1	0.288451	0.000547345	0.146689	-0.401752	-0.0437876	0.228548	0.0235359	-0.440669	0.771339	0.423645	0.217296	0.563766	0.241412	0.289704	-0.0780181	0.37329	-0.0968801	0.422551	0.0662469	0.45846	0.121511	-0.0257252	-0.374384	0.00875753	-0.266867	0.180748	-0.0755543	0.236453	-0.0842912	0.365403	0.211059	0.507389	0.0968801	0.229338	0.0202518	0.399562	0.047619	-0.172961	-0.563218	-0.152162	-0.368363	0.836344	0.761905	1	0.685824	-0.338807	0.14231	-0.325468	0.16913
MMP-13/TIMP-4 T1	0.576355	0.370553	0.13191	-0.28462	-0.252326	0.0747229	0.168035	-0.129351	0.824223	0.604269	0.453749	0.566502	0.627891	0.590909	0.33014	0.461412	0.379858	0.273125	-0.0257323	0.10776	0.262178	0.028462	-0.407772	-0.254516	0.0938826	-0.130631	-0.339447	-0.214559	-0.0941434	0.164226	0.0177936	0.0574713	0.0558292	0.260536	0.00383142	0.198139	0.366721	0.0503558	-0.370553	-0.143952	0.0793651	0.812808	0.737274	0.685824	1	-0.267105	0.41653	0.00246982	-0.280241
EMMPRIN CD147 T1	-0.0295567	0.135194	0.382047	0.475643	0.11549	-0.10921	0.22058	0.0534393	-0.0906974	-0.34647	-0.160372	-0.300493	-0.167784	-0.235487	0.0706269	-0.157635	-0.0361248	-0.0667761	0.28853	0.134906	0.121511	-0.028462	0.382047	0.15873	0.190502	-0.253047	0.0369559	-0.0678708	-0.0311987	-0.297797	-0.137695	-0.314724	-0.0131363	-0.112753	0.117132	0.00930487	0.0717022	-0.29064	-0.0498084	-0.158183	-0.0848385	-0.253421	-0.111658	-0.29283	-0.137931	0.539135	0.374932	0.198409	0.211275
TNF-alpha T1	-0.162562	-0.106185	0.382047	0.423645	0.39792	0.314493	0.22879	-0.211839	0.334841	-0.495895	-0.325123	-0.374932	-0.479266	-0.498905	-0.408979	-0.236453	-0.5052	0.0153257	0.33452	0.217714	-0.0530925	-0.156541	0.285714	0.20416	-0.192692	0.0167055	0.325486	0.206897	-0.0695129	-0.0027371	0.171914	0.124247	-0.0229885	-0.175698	0.112206	-0.0350301	-0.246853	-0.608648	-0.451013	-0.384236	-0.551177	0.0399562	0.264368	0.135194	-0.0487137	0.649152	0.458675	-0.00713504	0.714286
[truncated: 38 more columns]

## Sheet: Key_Biomarkers_Matrix
	TIMP-1 T1	TIMP-2 T1	TIMP-3 T1	TIMP-4 T1	MMP-1 T1	MMP-2 T1	MMP-3 T1	MMP-7 T1	MMP-8 T1	MMP-9 T1	MMP-10 T1	MMP-12 T1	MMP-13 T1	EMMPRIN CD147 T1
TIMP-1 T1	1	0.576355	0.235731	0.343733	-0.0541872	0.236453	0.436782	0.629995	0.338807	-0.117148	0.120963	0.22006	-0.0734348	0.539135
TIMP-2 T1	0.576355	1	0.343031	0.0410509	0.176793	0.626163	0.411604	0.454297	0.110564	-0.0361297	0.279693	0.21595	0.36964	0.374932
TIMP-3 T1	0.235731	0.343031	1	-0.340561	0.0954998	0.547752	0.0664108	0.365534	0.111965	-0.10704	0.0938533	0.469772	-0.297706	0.198409
TIMP-4 T1	0.343733	0.0410509	-0.340561	1	-0.16913	-0.500274	0.279146	0.286809	0.454844	0.460928	0.00930487	-0.454646	0.246335	0.211275
MMP-1 T1	-0.0541872	0.176793	0.0954998	-0.16913	1	0.27422	0.187192	-0.0667761	-0.0908593	0.226358	-0.235359	0.0441217	0.51651	-0.0295567
MMP-2 T1	0.236453	0.626163	0.547752	-0.500274	0.27422	1	0.377668	0.0394089	-0.360701	-0.511291	0.0645868	0.395177	0.0243869	0.135194
MMP-3 T1	0.436782	0.411604	0.0664108	0.279146	0.187192	0.377668	1	0.14012	0.0711549	-0.0470781	0.229885	-0.198685	0.31018	0.382047
MMP-7 T1	0.629995	0.454297	0.365534	0.286809	-0.0667761	0.0394089	0.14012	1	0.488232	0.190229	0.0870279	0.313785	-0.183313	0.475643
MMP-8 T1	0.338807	0.110564	0.111965	0.454844	-0.0908593	-0.360701	0.0711549	0.488232	1	0.522513	0.0290093	0.148534	-0.00493219	0.11549
MMP-9 T1	-0.117148	-0.0361297	-0.10704	0.460928	0.226358	-0.511291	-0.0470781	0.190229	0.522513	1	-0.130286	-0.265726	0.35681	-0.10921
MMP-10 T1	0.120963	0.279693	0.0938533	0.00930487	-0.235359	0.0645868	0.229885	0.0870279	0.0290093	-0.130286	1	-0.120033	0.166598	0.22058
MMP-12 T1	0.22006	0.21595	0.469772	-0.454646	0.0441217	0.395177	-0.198685	0.313785	0.148534	-0.265726	-0.120033	1	-0.474002	0.0534393
MMP-13 T1	-0.0734348	0.36964	-0.297706	0.246335	0.51651	0.0243869	0.31018	-0.183313	-0.00493219	0.35681	0.166598	-0.474002	1	-0.0906974
EMMPRIN CD147 T1	0.539135	0.374932	0.198409	0.211275	-0.0295567	0.135194	0.382047	0.475643	0.11549	-0.10921	0.22058	0.0534393	-0.0906974	1

## Sheet: All_lab_correlations
Biomarker	Clinical_Lab	N_pairs	Correlation	P_value	P_corrected	Significant_FDR
TIMP-1 T1	CRP admission [mg/l}	47	0.449507	0.00152581	0.0661183	FALSE
TIMP-1 T1	WBC admission [k/mcl]	47	0.0917055	0.539833	0.797191	FALSE
TIMP-1 T1	IL-6 admission pg/mL	33	-0.00234016	0.989688	0.989688	FALSE
TIMP-1 T1	ferritin admission [ng/mL]	39	0.398644	0.0119472	0.152474	FALSE
TIMP-1 T1	albumin admission [g/L]	47	-0.475177	0.000737721	0.0479518	TRUE
TIMP-2 T1	CRP admission [mg/l}	47	0.396369	0.00581264	0.111059	FALSE
TIMP-2 T1	WBC admission [k/mcl]	47	-0.0763827	0.609842	0.840485	FALSE
TIMP-2 T1	IL-6 admission pg/mL	33	0.00651901	0.971278	0.978807	FALSE
TIMP-2 T1	ferritin admission [ng/mL]	39	0.301058	0.062546	0.276823	FALSE
TIMP-2 T1	albumin admission [g/L]	47	-0.263814	0.073164	0.288222	FALSE
TIMP-3 T1	CRP admission [mg/l}	47	0.0178272	0.905327	0.97629	FALSE
TIMP-3 T1	WBC admission [k/mcl]	47	0.374197	0.0095648	0.138158	FALSE
TIMP-3 T1	IL-6 admission pg/mL	33	-0.273055	0.124174	0.347827	FALSE
TIMP-3 T1	ferritin admission [ng/mL]	39	-0.16247	0.323054	0.601102	FALSE
TIMP-3 T1	albumin admission [g/L]	47	-0.0104197	0.944582	0.977125	FALSE
TIMP-4 T1	CRP admission [mg/l}	47	0.314164	0.031509	0.195056	FALSE
TIMP-4 T1	WBC admission [k/mcl]	47	0.063839	0.669883	0.874467	FALSE
TIMP-4 T1	IL-6 admission pg/mL	33	0.187213	0.296834	0.575946	FALSE
TIMP-4 T1	ferritin admission [ng/mL]	39	0.266957	0.100409	0.330122	FALSE
TIMP-4 T1	albumin admission [g/L]	47	-0.102999	0.490858	0.7665	FALSE
TIMPT total T1	CRP admission [mg/l}	47	0.324843	0.0258907	0.195056	FALSE
TIMPT total T1	WBC admission [k/mcl]	47	0.316748	0.0300646	0.195056	FALSE
TIMPT total T1	IL-6 admission pg/mL	33	-0.116339	0.519093	0.784675	FALSE
TIMPT total T1	ferritin admission [ng/mL]	39	0.282634	0.0812699	0.308435	FALSE
TIMPT total T1	albumin admission [g/L]	47	-0.418389	0.00342628	0.111059	FALSE
EMMPRIN CD147 T1	CRP admission [mg/l}	47	-0.190407	0.199849	0.466263	FALSE
EMMPRIN CD147 T1	WBC admission [k/mcl]	47	0.0371795	0.804048	0.963376	FALSE
EMMPRIN CD147 T1	IL-6 admission pg/mL	33	0.0106979	0.952883	0.977125	FALSE
EMMPRIN CD147 T1	ferritin admission [ng/mL]	39	0.0542593	0.742862	0.924134	FALSE
EMMPRIN CD147 T1	albumin admission [g/L]	47	-0.18748	0.20698	0.47206	FALSE
MMP-1 T1	CRP admission [mg/l}	47	0.134898	0.365966	0.646964	FALSE
MMP-1 T1	WBC admission [k/mcl]	47	0.300153	0.0403773	0.20938	FALSE
MMP-1 T1	IL-6 admission pg/mL	33	0.0755537	0.676031	0.874467	FALSE
MMP-1 T1	ferritin admission [ng/mL]	39	0.0102242	0.950742	0.977125	FALSE
MMP-1 T1	albumin admission [g/L]	47	0.0319214	0.831325	0.965463	FALSE
MMP-2 T1	CRP admission [mg/l}	47	0.329527	0.0237051	0.195056	FALSE
MMP-2 T1	WBC admission [k/mcl]	47	-0.212842	0.150889	0.392311	FALSE
MMP-2 T1	IL-6 admission pg/mL	33	0.0040117	0.982323	0.986116	FALSE
MMP-2 T1	ferritin admission [ng/mL]	39	0.246697	0.130023	0.3574	FALSE
MMP-2 T1	albumin admission [g/L]	47	-0.227787	0.123585	0.347827	FALSE
MMP-3 T1	CRP admission [mg/l}	47	0.483044	0.000583669	0.0479518	TRUE
MMP-3 T1	WBC admission [k/mcl]	47	0.201683	0.174004	0.437266	FALSE
MMP-3 T1	IL-6 admission pg/mL	33	-0.214125	0.231477	0.496093	FALSE
MMP-3 T1	ferritin admission [ng/mL]	39	0.351977	0.0279898	0.195056	FALSE
MMP-3 T1	albumin admission [g/L]	47	-0.240046	0.104115	0.330122	FALSE
MMP-7 T1	CRP admission [mg/l}	47	0.292	0.0464163	0.227703	FALSE
MMP-7 T1	WBC admission [k/mcl]	47	0.231866	0.116824	0.345163	FALSE
MMP-7 T1	IL-6 admission pg/mL	33	0.0207271	0.90885	0.97629	FALSE
MMP-7 T1	ferritin admission [ng/mL]	39	0.346409	0.0307476	0.195056	FALSE
MMP-7 T1	albumin admission [g/L]	47	-0.182507	0.219501	0.48778	FALSE
MMP-8 T1	CRP admission [mg/l}	46	0.275018	0.0643458	0.276823	FALSE
MMP-8 T1	WBC admission [k/mcl]	46	0.510624	0.000288124	0.0479518	TRUE
MMP-8 T1	IL-6 admission pg/mL	33	0.307564	0.081652	0.308435	FALSE
MMP-8 T1	ferritin admission [ng/mL]	38	0.146101	0.381436	0.656778	FALSE
MMP-8 T1	albumin admission [g/L]	46	-0.140394	0.352053	0.631267	FALSE
MMP-9 T1	CRP admission [mg/l}	47	-0.0723372	0.628954	0.842929	FALSE
MMP-9 T1	WBC admission [k/mcl]	47	0.270498	0.0659215	0.276823	FALSE
MMP-9 T1	IL-6 admission pg/mL	33	0.328458	0.0620065	0.276823	FALSE
MMP-9 T1	ferritin admission [ng/mL]	39	-0.347034	0.0304273	0.195056	FALSE
MMP-9 T1	albumin admission [g/L]	47	0.153019	0.304487	0.582108	FALSE
MMP-10 T1	CRP admission [mg/l}	47	0.0191974	0.898087	0.97629	FALSE
MMP-10 T1	WBC admission [k/mcl]	47	0.273216	0.0631454	0.276823	FALSE
MMP-10 T1	IL-6 admission pg/mL	33	-0.276473	0.119349	0.347827	FALSE
MMP-10 T1	ferritin admission [ng/mL]	39	-0.0942498	0.568194	0.811706	FALSE
MMP-10 T1	albumin admission [g/L]	47	-0.0246068	0.869591	0.973313	FALSE
MMP-12 T1	CRP admission [mg/l}	47	0.237271	0.108301	0.335218	FALSE
MMP-12 T1	WBC admission [k/mcl]	47	0.364673	0.0117288	0.152474	FALSE
MMP-12 T1	IL-6 admission pg/mL	33	0.0766399	0.67163	0.874467	FALSE
MMP-12 T1	ferritin admission [ng/mL]	39	0.36185	0.0236022	0.195056	FALSE
MMP-12 T1	albumin admission [g/L]	47	-0.325194	0.0257214	0.195056	FALSE
MMP-13 T1	CRP admission [mg/l}	37	-0.0453494	0.78984	0.950733	FALSE
MMP-13 T1	WBC admission [k/mcl]	37	0.214638	0.202058	0.466263	FALSE
MMP-13 T1	IL-6 admission pg/mL	26	-0.0888359	0.666066	0.874467	FALSE
MMP-13 T1	ferritin admission [ng/mL]	31	-0.076558	0.682289	0.878193	FALSE
MMP-13 T1	albumin admission [g/L]	37	0.201662	0.231343	0.496093	FALSE
TNF-alpha T1	CRP admission [mg/l}	46	0.335101	0.0228172	0.195056	FALSE
TNF-alpha T1	WBC admission [k/mcl]	46	0.0920249	0.543015	0.797191	FALSE
TNF-alpha T1	IL-6 admission pg/mL	32	-0.138247	0.450511	0.736684	FALSE
TNF-alpha T1	ferritin admission [ng/mL]	38	0.310058	0.0581635	0.276823	FALSE
TNF-alpha T1	albumin admission [g/L]	46	-0.235612	0.114957	0.343548	FALSE
MMP-1/TIMP-1 T1	CRP admission [mg/l}	47	-0.155772	0.295763	0.575946	FALSE
MMP-1/TIMP-1 T1	WBC admission [k/mcl]	47	0.220301	0.136754	0.366556	FALSE
MMP-1/TIMP-1 T1	IL-6 admission pg/mL	33	0.0113665	0.949942	0.977125	FALSE
MMP-1/TIMP-1 T1	ferritin admission [ng/mL]	39	-0.321101	0.0462432	0.227703	FALSE
MMP-1/TIMP-1 T1	albumin admission [g/L]	47	0.323493	0.0265513	0.195056	FALSE
MMP-1/TIMP-2 T1	CRP admission [mg/l}	47	-0.0193125	0.897479	0.97629	FALSE
MMP-1/TIMP-2 T1	WBC admission [k/mcl]	47	0.322877	0.026857	0.195056	FALSE
MMP-1/TIMP-2 T1	IL-6 admission pg/mL	33	0.0386126	0.831062	0.965463	FALSE
MMP-1/TIMP-2 T1	ferritin admission [ng/mL]	39	-0.141013	0.39185	0.67027	FALSE
MMP-1/TIMP-2 T1	albumin admission [g/L]	47	0.150586	0.312333	0.588453	FALSE
MMP-1/TIMP-3 T1	CRP admission [mg/l}	47	0.222036	0.133613	0.361868	FALSE
MMP-1/TIMP-3 T1	WBC admission [k/mcl]	47	-0.0506519	0.735274	0.919092	FALSE
MMP-1/TIMP-3 T1	IL-6 admission pg/mL	33	0.203594	0.255784	0.527807	FALSE
MMP-1/TIMP-3 T1	ferritin admission [ng/mL]	39	0.081895	0.620157	0.840485	FALSE
MMP-1/TIMP-3 T1	albumin admission [g/L]	47	-0.0120283	0.936043	0.977125	FALSE
MMP-1/TIMP-4 T1	CRP admission [mg/l}	47	-0.0268051	0.858055	0.973313	FALSE
MMP-1/TIMP-4 T1	WBC admission [k/mcl]	47	0.267675	0.0689078	0.276918	FALSE
MMP-1/TIMP-4 T1	IL-6 admission pg/mL	33	-0.0975753	0.589055	0.83236	FALSE
MMP-1/TIMP-4 T1	ferritin admission [ng/mL]	39	-0.129955	0.430395	0.710691	FALSE
MMP-1/TIMP-4 T1	albumin admission [g/L]	47	0.0523728	0.726623	0.917096	FALSE
MMP-2/TIMP-1 T1	CRP admission [mg/l}	47	-0.132848	0.373366	0.647167	FALSE
MMP-2/TIMP-1 T1	WBC admission [k/mcl]	47	-0.201382	0.174659	0.437266	FALSE
MMP-2/TIMP-1 T1	IL-6 admission pg/mL	33	0.0217391	0.904419	0.97629	FALSE
MMP-2/TIMP-1 T1	ferritin admission [ng/mL]	39	-0.196648	0.230189	0.496093	FALSE
MMP-2/TIMP-1 T1	albumin admission [g/L]	47	0.213437	0.149724	0.392311	FALSE
MMP-2/TIMP-2 T1	CRP admission [mg/l}	47	0.0900943	0.547008	0.797191	FALSE
MMP-2/TIMP-2 T1	WBC admission [k/mcl]	47	-0.274446	0.0619199	0.276823	FALSE
MMP-2/TIMP-2 T1	IL-6 admission pg/mL	33	-0.0282514	0.875982	0.973313	FALSE
MMP-2/TIMP-2 T1	ferritin admission [ng/mL]	39	0.0134656	0.935155	0.977125	FALSE
MMP-2/TIMP-2 T1	albumin admission [g/L]	47	-0.0483489	0.746903	0.924736	FALSE
MMP-2/TIMP-3 T1	CRP admission [mg/l}	47	0.200503	0.176588	0.437266	FALSE
MMP-2/TIMP-3 T1	WBC admission [k/mcl]	47	-0.270412	0.0660117	0.276823	FALSE
MMP-2/TIMP-3 T1	IL-6 admission pg/mL	33	0.182297	0.309926	0.588181	FALSE
MMP-2/TIMP-3 T1	ferritin admission [ng/mL]	39	0.294037	0.0692296	0.276918	FALSE
MMP-2/TIMP-3 T1	albumin admission [g/L]	47	-0.136046	0.361866	0.644418	FALSE
MMP-2/TIMP-4 T1	CRP admission [mg/l}	47	-0.0164792	0.912456	0.97629	FALSE
MMP-2/TIMP-4 T1	WBC admission [k/mcl]	47	-0.145306	0.329793	0.608129	FALSE
MMP-2/TIMP-4 T1	IL-6 admission pg/mL	33	-0.199248	0.266289	0.540899	FALSE
MMP-2/TIMP-4 T1	ferritin admission [ng/mL]	39	-0.0271296	0.869777	0.973313	FALSE
MMP-2/TIMP-4 T1	albumin admission [g/L]	47	-0.0892294	0.550878	0.797191	FALSE
MMP-3/TIMP-1 T1	CRP admission [mg/l}	47	0.244066	0.098273	0.330122	FALSE
MMP-3/TIMP-1 T1	WBC admission [k/mcl]	47	0.121252	0.416859	0.702624	FALSE
MMP-3/TIMP-1 T1	IL-6 admission pg/mL	33	-0.364396	0.0370808	0.20938	FALSE
MMP-3/TIMP-1 T1	ferritin admission [ng/mL]	39	0.113276	0.492329	0.7665	FALSE
MMP-3/TIMP-1 T1	albumin admission [g/L]	47	0.00988868	0.947402	0.977125	FALSE
MMP-3/TIMP-2 T1	CRP admission [mg/l}	47	0.374971	0.00940514	0.138158	FALSE
MMP-3/TIMP-2 T1	WBC admission [k/mcl]	47	0.240053	0.104105	0.330122	FALSE
MMP-3/TIMP-2 T1	IL-6 admission pg/mL	33	-0.212691	0.23469	0.496093	FALSE
MMP-3/TIMP-2 T1	ferritin admission [ng/mL]	39	0.260011	0.109916	0.336214	FALSE
MMP-3/TIMP-2 T1	albumin admission [g/L]	47	-0.163331	0.272651	0.545302	FALSE
MMP-3/TIMP-3 T1	CRP admission [mg/l}	47	0.493732	0.000420728	0.0479518	TRUE
MMP-3/TIMP-3 T1	WBC admission [k/mcl]	47	-0.035008	0.815287	0.965463	FALSE
MMP-3/TIMP-3 T1	IL-6 admission pg/mL	33	-0.0388285	0.830132	0.965463	FALSE
MMP-3/TIMP-3 T1	ferritin admission [ng/mL]	39	0.433313	0.00585938	0.111059	FALSE
MMP-3/TIMP-3 T1	albumin admission [g/L]	47	-0.160175	0.282152	0.559996	FALSE
MMP-3/TIMP-4 T1	CRP admission [mg/l}	47	0.320622	0.0280023	0.195056	FALSE
MMP-3/TIMP-4 T1	WBC admission [k/mcl]	47	0.189251	0.202645	0.466263	FALSE
MMP-3/TIMP-4 T1	IL-6 admission pg/mL	33	-0.403677	0.019824	0.195056	FALSE
MMP-3/TIMP-4 T1	ferritin admission [ng/mL]	39	0.195171	0.233779	0.496093	FALSE
MMP-3/TIMP-4 T1	albumin admission [g/L]	47	-0.242822	0.100053	0.330122	FALSE
MMP-7/TIMP-1 T1	CRP admission [mg/l}	47	-0.125361	0.401126	0.681653	FALSE
MMP-7/TIMP-1 T1	WBC admission [k/mcl]	47	0.171909	0.247909	0.515652	FALSE
MMP-7/TIMP-1 T1	IL-6 admission pg/mL	33	0.0203945	0.910307	0.97629	FALSE
MMP-7/TIMP-1 T1	ferritin admission [ng/mL]	39	-0.123001	0.455676	0.740473	FALSE
MMP-7/TIMP-1 T1	albumin admission [g/L]	47	0.309854	0.0340461	0.20586	FALSE
MMP-7/TIMP-2 T1	CRP admission [mg/l}	47	0.0670155	0.654465	0.87262	FALSE
MMP-7/TIMP-2 T1	WBC admission [k/mcl]	47	0.227298	0.124415	0.347827	FALSE
MMP-7/TIMP-2 T1	IL-6 admission pg/mL	33	-0.0543251	0.763977	0.941393	FALSE
MMP-7/TIMP-2 T1	ferritin admission [ng/mL]	39	0.154679	0.347105	0.631267	FALSE
MMP-7/TIMP-2 T1	albumin admission [g/L]	47	-0.00676594	0.963999	0.977125	FALSE
MMP-7/TIMP-3 T1	CRP admission [mg/l}	47	0.299907	0.0405494	0.20938	FALSE
MMP-7/TIMP-3 T1	WBC admission [k/mcl]	47	-0.095362	0.523721	0.787095	FALSE
MMP-7/TIMP-3 T1	IL-6 admission pg/mL	33	0.101329	0.574732	0.81656	FALSE
MMP-7/TIMP-3 T1	ferritin admission [ng/mL]	39	0.377158	0.0179392	0.195056	FALSE
MMP-7/TIMP-3 T1	albumin admission [g/L]	47	-0.102834	0.491555	0.7665	FALSE
MMP-7/TIMP-4 T1	CRP admission [mg/l}	47	-0.0319773	0.831033	0.965463	FALSE
MMP-7/TIMP-4 T1	WBC admission [k/mcl]	47	0.193078	0.193495	0.465821	FALSE
MMP-7/TIMP-4 T1	IL-6 admission pg/mL	33	-0.208793	0.24358	0.510733	FALSE
MMP-7/TIMP-4 T1	ferritin admission [ng/mL]	39	0.0614528	0.710162	0.909568	FALSE
MMP-7/TIMP-4 T1	albumin admission [g/L]	47	-0.028222	0.850636	0.973313	FALSE
MMP-8/TIMP-1 T1	CRP admission [mg/l}	47	0.00861919	0.954147	0.977125	FALSE
MMP-8/TIMP-1 T1	WBC admission [k/mcl]	47	0.362353	0.0123152	0.152474	FALSE
MMP-8/TIMP-1 T1	IL-6 admission pg/mL	33	0.268662	0.130588	0.3574	FALSE
MMP-8/TIMP-1 T1	ferritin admission [ng/mL]	39	-0.132469	0.421451	0.702624	FALSE
MMP-8/TIMP-1 T1	albumin admission [g/L]	47	0.0766561	0.608559	0.840485	FALSE
MMP-8/TIMP-2 T1	CRP admission [mg/l}	47	0.0756441	0.613313	0.840485	FALSE
MMP-8/TIMP-2 T1	WBC admission [k/mcl]	47	0.387011	0.00720156	0.117025	FALSE
MMP-8/TIMP-2 T1	IL-6 admission pg/mL	33	0.275539	0.120653	0.347827	FALSE
MMP-8/TIMP-2 T1	ferritin admission [ng/mL]	39	-0.0292614	0.859642	0.973313	FALSE
MMP-8/TIMP-2 T1	albumin admission [g/L]	47	0.0193759	0.897144	0.97629	FALSE
MMP-8/TIMP-3 T1	CRP admission [mg/l}	47	0.315243	0.0308991	0.195056	FALSE
MMP-8/TIMP-3 T1	WBC admission [k/mcl]	47	0.0787891	0.598593	0.836742	FALSE
MMP-8/TIMP-3 T1	IL-6 admission pg/mL	33	0.304188	0.0852324	0.308435	FALSE
MMP-8/TIMP-3 T1	ferritin admission [ng/mL]	39	0.2	0.222184	0.489557	FALSE
MMP-8/TIMP-3 T1	albumin admission [g/L]	47	-0.10919	0.465024	0.746335	FALSE
MMP-8/TIMP-4 T1	CRP admission [mg/l}	47	0.120038	0.421575	0.702624	FALSE
MMP-8/TIMP-4 T1	WBC admission [k/mcl]	47	0.399202	0.00544102	0.111059	FALSE
MMP-8/TIMP-4 T1	IL-6 admission pg/mL	33	0.0894275	0.620666	0.840485	FALSE
MMP-8/TIMP-4 T1	ferritin admission [ng/mL]	39	-0.0452498	0.784445	0.950733	FALSE
MMP-8/TIMP-4 T1	albumin admission [g/L]	47	-0.100564	0.501218	0.771473	FALSE
MMP-9/TIMP-1 T1	CRP admission [mg/l}	47	-0.255884	0.0825556	0.308435	FALSE
MMP-9/TIMP-1 T1	WBC admission [k/mcl]	47	0.273348	0.0630136	0.276823	FALSE
MMP-9/TIMP-1 T1	IL-6 admission pg/mL	33	0.229875	0.198118	0.466263	FALSE
MMP-9/TIMP-1 T1	ferritin admission [ng/mL]	39	-0.496381	0.00130913	0.0661183	FALSE
MMP-9/TIMP-1 T1	albumin admission [g/L]	47	0.328784	0.0240412	0.195056	FALSE
MMP-9/TIMP-2 T1	CRP admission [mg/l}	47	-0.195894	0.186953	0.454278	FALSE
MMP-9/TIMP-2 T1	WBC admission [k/mcl]	47	0.299176	0.0410653	0.20938	FALSE
MMP-9/TIMP-2 T1	IL-6 admission pg/mL	33	0.251547	0.157911	0.406504	FALSE
MMP-9/TIMP-2 T1	ferritin admission [ng/mL]	39	-0.43265	0.0059439	0.111059	FALSE
MMP-9/TIMP-2 T1	albumin admission [g/L]	47	0.237414	0.108084	0.335218	FALSE
MMP-9/TIMP-3 T1	CRP admission [mg/l}	47	0.0789025	0.598065	0.836742	FALSE
MMP-9/TIMP-3 T1	WBC admission [k/mcl]	47	-0.0913349	0.541479	0.797191	FALSE
MMP-9/TIMP-3 T1	IL-6 admission pg/mL	33	0.304021	0.0854128	0.308435	FALSE
MMP-9/TIMP-3 T1	ferritin admission [ng/mL]	39	-0.118344	0.473042	0.749944	FALSE
MMP-9/TIMP-3 T1	albumin admission [g/L]	47	0.134257	0.368272	0.646964	FALSE
MMP-9/TIMP-4 T1	CRP admission [mg/l}	34	-0.0316272	0.859066	0.973313	FALSE
MMP-9/TIMP-4 T1	WBC admission [k/mcl]	34	-0.0279603	0.875271	0.973313	FALSE
MMP-9/TIMP-4 T1	IL-6 admission pg/mL	23	0.062253	0.777806	0.949435	FALSE
MMP-9/TIMP-4 T1	ferritin admission [ng/mL]	28	-0.183361	0.35032	0.631267	FALSE
MMP-9/TIMP-4 T1	albumin admission [g/L]	34	0.00962788	0.956903	0.977125	FALSE
MMP-10/TIMP-1 T1	CRP admission [mg/l}	47	-0.215329	0.146063	0.387513	FALSE
MMP-10/TIMP-1 T1	WBC admission [k/mcl]	47	0.185377	0.212213	0.477781	FALSE
MMP-10/TIMP-1 T1	IL-6 admission pg/mL	33	-0.300042	0.0897934	0.31549	FALSE
MMP-10/TIMP-1 T1	ferritin admission [ng/mL]	39	-0.33659	0.036155	0.20938	FALSE
MMP-10/TIMP-1 T1	albumin admission [g/L]	47	0.240393	0.103601	0.330122	FALSE
MMP-10/TIMP-2 T1	CRP admission [mg/l}	47	-0.107375	0.472519	0.749944	FALSE
MMP-10/TIMP-2 T1	WBC admission [k/mcl]	47	0.329411	0.0237572	0.195056	FALSE
MMP-10/TIMP-2 T1	IL-6 admission pg/mL	33	-0.357543	0.0410708	0.20938	FALSE
MMP-10/TIMP-2 T1	ferritin admission [ng/mL]	39	-0.209242	0.201105	0.466263	FALSE
MMP-10/TIMP-2 T1	albumin admission [g/L]	47	0.0527975	0.724493	0.917096	FALSE
MMP-10/TIMP-3 T1	CRP admission [mg/l}	47	0.097372	0.514967	0.782991	FALSE
MMP-10/TIMP-3 T1	WBC admission [k/mcl]	47	-0.138888	0.351827	0.631267	FALSE
MMP-10/TIMP-3 T1	IL-6 admission pg/mL	33	-0.0384455	0.831783	0.965463	FALSE
MMP-10/TIMP-3 T1	ferritin admission [ng/mL]	39	0.0476793	0.773168	0.948225	FALSE
MMP-10/TIMP-3 T1	albumin admission [g/L]	47	-0.00665028	0.964614	0.977125	FALSE
MMP-10/TIMP-4 T1	CRP admission [mg/l}	47	-0.133222	0.372009	0.647167	FALSE
MMP-10/TIMP-4 T1	WBC admission [k/mcl]	47	0.200989	0.175521	0.437266	FALSE
MMP-10/TIMP-4 T1	IL-6 admission pg/mL	33	-0.375261	0.0314028	0.195056	FALSE
MMP-10/TIMP-4 T1	ferritin admission [ng/mL]	39	-0.203877	0.213164	0.477781	FALSE
MMP-10/TIMP-4 T1	albumin admission [g/L]	47	0.0341767	0.819599	0.965463	FALSE
MMP-12/TIMP-1 T1	CRP admission [mg/l}	47	-0.0981815	0.511462	0.782236	FALSE
MMP-12/TIMP-1 T1	WBC admission [k/mcl]	47	0.392148	0.00640722	0.111059	FALSE
MMP-12/TIMP-1 T1	IL-6 admission pg/mL	33	0.0623485	0.730327	0.917319	FALSE
MMP-12/TIMP-1 T1	ferritin admission [ng/mL]	39	-0.0070861	0.96585	0.977125	FALSE
MMP-12/TIMP-1 T1	albumin admission [g/L]	47	0.0223796	0.881306	0.975062	FALSE
MMP-12/TIMP-2 T1	CRP admission [mg/l}	47	0.0752841	0.615008	0.840485	FALSE
MMP-12/TIMP-2 T1	WBC admission [k/mcl]	47	0.406141	0.00461715	0.111059	FALSE
MMP-12/TIMP-2 T1	IL-6 admission pg/mL	33	0.00885917	0.960975	0.977125	FALSE
MMP-12/TIMP-2 T1	ferritin admission [ng/mL]	39	0.169459	0.30239	0.582108	FALSE
MMP-12/TIMP-2 T1	albumin admission [g/L]	47	-0.196501	0.185563	0.454278	FALSE
MMP-12/TIMP-3 T1	CRP admission [mg/l}	47	0.267492	0.0691052	0.276918	FALSE
MMP-12/TIMP-3 T1	WBC admission [k/mcl]	47	-0.072742	0.627031	0.842929	FALSE
MMP-12/TIMP-3 T1	IL-6 admission pg/mL	33	0.362588	0.0381018	0.20938	FALSE
MMP-12/TIMP-3 T1	ferritin admission [ng/mL]	39	0.374469	0.018842	0.195056	FALSE
MMP-12/TIMP-3 T1	albumin admission [g/L]	47	-0.250636	0.0892726	0.31549	FALSE
MMP-12/TIMP-4 T1	CRP admission [mg/l}	47	-0.0405909	0.786471	0.950733	FALSE
MMP-12/TIMP-4 T1	WBC admission [k/mcl]	47	0.240308	0.103728	0.330122	FALSE
MMP-12/TIMP-4 T1	IL-6 admission pg/mL	33	-0.0755537	0.676031	0.874467	FALSE
MMP-12/TIMP-4 T1	ferritin admission [ng/mL]	39	0.0579035	0.726236	0.917096	FALSE
MMP-12/TIMP-4 T1	albumin admission [g/L]	47	-0.163713	0.271518	0.545302	FALSE
MMP-13/TIMP-1 T1	CRP admission [mg/l}	37	-0.288661	0.0831507	0.308435	FALSE
MMP-13/TIMP-1 T1	WBC admission [k/mcl]	37	0.0288068	0.865603	0.973313	FALSE
MMP-13/TIMP-1 T1	IL-6 admission pg/mL	26	-0.0424004	0.837057	0.967266	FALSE
MMP-13/TIMP-1 T1	ferritin admission [ng/mL]	31	-0.374836	0.0377397	0.20938	FALSE
MMP-13/TIMP-1 T1	albumin admission [g/L]	37	0.450768	0.00511215	0.111059	FALSE
MMP-13/TIMP-2 T1	CRP admission [mg/l}	37	-0.274317	0.100378	0.330122	FALSE
MMP-13/TIMP-2 T1	WBC admission [k/mcl]	37	0.188252	0.264507	0.540899	FALSE
MMP-13/TIMP-2 T1	IL-6 admission pg/mL	26	0.0143614	0.944487	0.977125	FALSE
MMP-13/TIMP-2 T1	ferritin admission [ng/mL]	31	-0.290553	0.112812	0.341059	FALSE
MMP-13/TIMP-2 T1	albumin admission [g/L]	37	0.440453	0.00636719	0.111059	FALSE
MMP-13/TIMP-3 T1	CRP admission [mg/l}	37	-0.10102	0.551901	0.797191	FALSE
MMP-13/TIMP-3 T1	WBC admission [k/mcl]	37	0.114062	0.501457	0.771473	FALSE
MMP-13/TIMP-3 T1	IL-6 admission pg/mL	26	-0.0879234	0.669304	0.874467	FALSE
MMP-13/TIMP-3 T1	ferritin admission [ng/mL]	31	-0.115962	0.534454	0.797191	FALSE
MMP-13/TIMP-3 T1	albumin admission [g/L]	37	0.370568	0.0239602	0.195056	FALSE
MMP-13/TIMP-4 T1	CRP admission [mg/l}	37	-0.124355	0.463366	0.746335	FALSE
MMP-13/TIMP-4 T1	WBC admission [k/mcl]	37	0.0970897	0.567554	0.811706	FALSE
MMP-13/TIMP-4 T1	IL-6 admission pg/mL	26	-0.161053	0.431881	0.710691	FALSE
MMP-13/TIMP-4 T1	ferritin admission [ng/mL]	31	-0.183285	0.323671	0.601102	FALSE
MMP-13/TIMP-4 T1	albumin admission [g/L]	37	0.179027	0.289056	0.569353	FALSE

## Sheet: Significant_lab_correlations
Biomarker	Clinical_Lab	N_pairs	Correlation	P_value	P_corrected	Significant_FDR
TIMP-1 T1	albumin admission [g/L]	47	-0.475177	0.000737721	0.0479518	TRUE
MMP-3 T1	CRP admission [mg/l}	47	0.483044	0.000583669	0.0479518	TRUE
MMP-8 T1	WBC admission [k/mcl]	46	0.510624	0.000288124	0.0479518	TRUE
MMP-3/TIMP-3 T1	CRP admission [mg/l}	47	0.493732	0.000420728	0.0479518	TRUE
