# Supplementary material
Source: Research Square preprint supplement (doi:10.21203/rs.3.rs-7754190/v1)
Supplement: Supplementary file 7 [file e2cf96f043382ce36719e635.xlsx]

## Sheet: All_Biomarkers_T1_Results
Biomarker	Kruskal_H_Statistic	P_Value	Eta_Squared	Effect_Size_Interpretation	Significant	MIS-C/KD_Median	MIS-C/KD_IQR	MIS-C/KD_N	Healthy_Controls_Median	Healthy_Controls_IQR	Healthy_Controls_N	Febrile_Controls_Median	Febrile_Controls_IQR	Febrile_Controls_N	MIS-C/KD vs Healthy_Controls_P_Value	MIS-C/KD vs Febrile_Controls_P_Value	Healthy_Controls vs Febrile_Controls_P_Value
EMMPRIN CD147 T1	17.8512	0.000132944	0.14677	Large	TRUE	8812.36	7467.80-10834.86	47	7313.7	6214.55-8478.47	24	6123.49	4172.38-8003.15	40	0.0101443	8.32922e-05	0.100321
MMP-1 T1	9.49163	0.00868798	0.0693669	Medium	TRUE	1992.42	1301.72-3157.52	46	3608.93	2541.14-5312.58	24	2410.15	1652.90-3736.95	41	0.00258816	0.29758	0.0281405
MMP-1/TIMP-1 T1	27.1776	1.25448e-06	0.254319	Large	TRUE	0.0063286	0.00-0.01	47	0.0264789	0.01-0.03	14	0.0115343	0.01-0.03	41	4.63534e-05	1.84581e-05	0.119856
MMP-1/TIMP-2 T1	7.01642	0.0299505	0.0506709	Small	TRUE	0.0146864	0.01-0.02	47	0.0388399	0.02-0.05	14	0.0241433	0.01-0.04	41	0.0210677	0.0564985	0.283566
MMP-1/TIMP-3 T1	16.3127	0.000286905	0.144573	Large	TRUE	0.0326886	0.01-0.05	47	0.0253193	0.02-0.05	14	0.0572996	0.03-0.12	41	0.612895	0.000127586	0.0116871
MMP-1/TIMP-4 T1	15.5931	0.000411142	0.137304	Medium	TRUE	1.01264	0.62-2.15	47	5.02675	2.69-6.81	14	1.47243	0.64-2.72	41	2.7487e-05	0.183518	0.0110607
MMP-10 T1	6.06106	0.0482901	0.0451229	Small	TRUE	869.936	662.93-1600.36	47	665.55	541.06-990.71	13	703.06	466.57-1075.81	33	0.0756633	0.0323239	0.826208
MMP-10/TIMP-1 T1	9.53218	0.0085136	0.0836909	Medium	TRUE	0.00278419	0.00-0.00	47	0.00437117	0.00-0.01	13	0.0040786	0.00-0.01	33	0.0170108	0.0113644	0.464248
MMP-10/TIMP-2 T1	1.32607	0.515285	0	Negligible	FALSE	0.00759441	0.01-0.01	47	0.00684922	0.01-0.01	13	0.00681641	0.00-0.01	33	0.298006	0.422893	0.751134
MMP-10/TIMP-3 T1	9.8154	0.00738945	0.0868378	Medium	TRUE	0.0119777	0.01-0.03	47	0.00363266	0.00-0.03	13	0.0202991	0.02-0.03	33	0.243484	0.00719538	0.0191814
MMP-10/TIMP-4 T1	1.9212	0.382663	0	Negligible	FALSE	0.478181	0.32-1.16	47	0.670993	0.43-1.92	13	0.538471	0.28-0.95	33	0.172662	0.806973	0.251548
MMP-12 T1	32.8561	7.33481e-08	0.342846	Large	TRUE	60.2851	45.31-68.72	47	57.78	55.75-66.84	13	35.7605	30.89-41.03	33	0.760179	4.0311e-07	3.44719e-06
MMP-12/TIMP-1 T1	22.5013	1.29986e-05	0.227793	Large	TRUE	0.000165445	0.00-0.00	47	0.000387883	0.00-0.00	13	0.000177831	0.00-0.00	33	1.15816e-06	0.1374	0.00128087
MMP-12/TIMP-2 T1	12.0182	0.00245627	0.111314	Medium	TRUE	0.00051049	0.00-0.00	47	0.000581096	0.00-0.00	13	0.000321444	0.00-0.00	33	0.127212	0.0175529	0.000831144
MMP-12/TIMP-3 T1	3.592	0.165962	0.0176889	Small	FALSE	0.000833796	0.00-0.00	47	0.00029515	0.00-0.00	13	0.00100578	0.00-0.00	33	0.964218	0.0802052	0.171876
MMP-12/TIMP-4 T1	12.22	0.00222054	0.113556	Medium	TRUE	0.0316691	0.02-0.05	47	0.0671235	0.05-0.10	13	0.0186208	0.01-0.07	33	0.000901685	0.165194	0.00583856
MMP-13 T1	7.84225	0.0198188	0.0635027	Medium	TRUE	1008.15	519.34-1299.60	37	455.35	255.18-718.03	17	1000.79	514.49-1449.75	41	0.00791895	0.845127	0.0134941
MMP-13/TIMP-1 T1	16.9627	0.000207299	0.182472	Large	TRUE	0.00238056	0.00-0.00	37	0.00393527	0.00-0.01	7	0.00542772	0.00-0.01	41	0.102658	4.45209e-05	0.586539
MMP-13/TIMP-2 T1	4.90958	0.0858813	0.0354827	Small	FALSE	0.00674323	0.00-0.01	37	0.00464627	0.00-0.01	7	0.00946921	0.01-0.01	41	0.343461	0.0585926	0.155438
MMP-13/TIMP-3 T1	6.57115	0.0374191	0.0557457	Small	TRUE	0.0187466	0.01-0.03	37	0.0238134	0.01-0.06	7	0.0268512	0.02-0.05	41	0.48019	0.00861789	0.883873
MMP-13/TIMP-4 T1	4.24139	0.119948	0.027334	Small	FALSE	0.437263	0.26-0.72	37	1.39726	0.44-2.48	7	0.613676	0.29-1.08	41	0.0571555	0.216527	0.214165
MMP-2 T1	2.97606	0.225817	0.0107259	Small	FALSE	348333	246869.83-448841.95	47	253168	225028.95-540350.18	14	281587	244698.63-331159.59	33	0.790366	0.0592611	0.789073
MMP-2/TIMP-1 T1	31.4884	1.45336e-07	0.327649	Large	TRUE	0.926469	0.73-1.33	47	1.99666	1.48-3.69	13	1.58755	1.27-2.26	33	1.79903e-05	3.96883e-06	0.118447
MMP-2/TIMP-2 T1	2.91968	0.232274	0.0102186	Small	FALSE	2.62761	2.17-3.09	47	2.7888	2.28-4.38	13	2.63042	2.39-3.21	33	0.110274	0.295679	0.44949
MMP-2/TIMP-3 T1	9.66953	0.00794855	0.085217	Medium	TRUE	5.85299	4.19-7.95	47	1.22448	1.00-22.32	13	9.29335	5.76-11.96	33	0.942782	0.00182275	0.107373
MMP-2/TIMP-4 T1	6.10401	0.0472641	0.0456001	Small	TRUE	172.566	106.80-278.51	47	338.602	174.19-883.28	13	175.424	102.63-448.45	33	0.0108353	0.688636	0.0637288
MMP-3 T1	50.0657	1.34388e-11	0.449213	Large	TRUE	9063.35	5024.89-12977.23	47	1837.09	1593.46-2037.78	23	2136.29	1519.21-3987.74	40	2.27414e-09	9.69476e-09	0.17731
MMP-3/TIMP-1 T1	16.9034	0.000213532	0.152076	Large	TRUE	0.0221658	0.02-0.04	47	0.011276	0.01-0.01	14	0.0142431	0.01-0.02	40	7.1756e-05	0.00373246	0.447294
MMP-3/TIMP-2 T1	38.5625	4.22915e-09	0.373087	Large	TRUE	0.0629512	0.05-0.09	47	0.014634	0.01-0.02	14	0.0182704	0.01-0.04	40	8.18826e-07	3.29485e-07	0.136156
MMP-3/TIMP-3 T1	17.8334	0.000134131	0.161565	Large	TRUE	0.123917	0.07-0.19	47	0.0175434	0.01-0.04	14	0.0557569	0.04-0.12	40	0.00016683	0.0422318	0.00101452
MMP-3/TIMP-4 T1	17.0255	0.000200894	0.153321	Large	TRUE	5.34131	2.97-8.59	47	1.79327	1.15-2.52	14	1.21214	0.78-5.11	40	0.00276434	0.000254276	0.424052
MMP-7 T1	30.9605	1.89244e-07	0.268152	Large	TRUE	3593.91	2803.20-5253.29	46	1962.99	1465.48-2357.90	24	2522.45	1325.21-3654.21	41	2.86791e-08	0.000452246	0.0783508
MMP-7/TIMP-1 T1	5.45702	0.0653165	0.0349194	Small	FALSE	0.0105846	0.01-0.01	47	0.0146171	0.01-0.02	14	0.0138901	0.01-0.02	41	0.087916	0.0388189	1
MMP-7/TIMP-2 T1	10.4497	0.00538124	0.0853502	Medium	TRUE	0.0305977	0.02-0.04	47	0.0190877	0.01-0.03	14	0.0237922	0.01-0.04	41	0.00164868	0.0396154	0.219855
MMP-7/TIMP-3 T1	10.0671	0.0065156	0.081486	Medium	TRUE	0.0649005	0.03-0.09	47	0.0148915	0.01-0.05	14	0.065347	0.05-0.13	41	0.0230583	0.22517	0.00129526
MMP-7/TIMP-4 T1	5.46937	0.0649143	0.0350442	Small	FALSE	2.33055	1.29-3.28	47	2.20333	1.37-3.27	14	1.62633	0.77-2.72	41	0.857088	0.0329231	0.0985371
MMP-8 T1	52.2832	4.43454e-12	0.465585	Large	TRUE	49861.8	26186.91-87882.25	46	5072.36	3865.02-6799.59	24	8463.75	2393.69-19051.13	41	4.66933e-10	6.14323e-09	0.184892
MMP-8/TIMP-1 T1	23.7069	7.11415e-06	0.219261	Large	TRUE	0.112789	0.07-0.20	47	0.0428243	0.03-0.06	14	0.0455497	0.02-0.09	41	0.000204715	2.48838e-05	0.794216
MMP-8/TIMP-2 T1	38.7914	3.77187e-09	0.37163	Large	TRUE	0.395424	0.15-0.60	47	0.0588465	0.04-0.08	14	0.0689668	0.03-0.15	41	4.47916e-06	4.48593e-08	0.568689
MMP-8/TIMP-3 T1	20.6943	3.20842e-05	0.188831	Large	TRUE	0.575988	0.20-1.17	47	0.0421558	0.03-0.24	14	0.222859	0.06-0.54	41	0.000135616	0.0011723	0.0209481
MMP-8/TIMP-4 T1	33.3702	5.67216e-08	0.316871	Large	TRUE	28.3487	12.65-40.27	47	8.00411	3.66-14.77	14	5.40681	2.18-10.18	41	0.00102215	3.37541e-08	0.338863
MMP-9 T1	0.887536	0.641614	0	Negligible	FALSE	237126	151013.24-694509.35	47	237564	147695.09-324408.38	13	366845	88270.73-718028.28	33	0.419399	0.945456	0.341385
MMP-9/TIMP-1 T1	9.68843	0.0078738	0.085427	Medium	TRUE	0.816891	0.43-1.84	47	1.6081	1.01-2.05	13	1.94899	0.93-2.81	33	0.0548648	0.00393745	0.642993
MMP-9/TIMP-2 T1	1.05565	0.589886	0	Negligible	FALSE	1.91445	1.20-5.28	47	2.38026	1.42-3.21	13	3.01572	1.53-5.46	33	0.900045	0.400625	0.353908
MMP-9/TIMP-3 T1	16.5589	0.000253679	0.161765	Large	TRUE	3.24583	1.91-10.62	47	2.5426	0.99-6.11	13	10.5096	7.84-17.93	33	0.314978	0.000418444	0.00139427
MMP-9/TIMP-4 T1	18.4607	9.80213e-05	0.182896	Large	TRUE	127.827	74.90-203.30	47	329.786	185.57-481.62	13	249.408	161.76-339.19	33	0.00109193	0.000374416	0.272289
TIMP-1 T1	50.8474	9.09134e-12	0.488474	Large	TRUE	346720	277598.84-465600.34	47	151241	141251.34-161309.23	15	217694	121388.37-232639.01	41	9.18938e-08	1.90255e-09	0.0187867
TIMP-2 T1	3.44957	0.178212	0.0144957	Small	FALSE	129855	104793.98-150000.99	47	99792.3	91659.63-130130.85	15	116065	105350.67-137244.76	41	0.0968844	0.189092	0.482011
TIMP-3 T1	24.5255	4.7244e-06	0.225255	Large	TRUE	62568.1	55315.80-95566.35	47	87193	47463.14-226461.26	15	38945.7	26330.50-53992.05	41	0.668858	1.79716e-06	0.00254733
TIMP-4 T1	15.972	0.000340193	0.13972	Medium	TRUE	2008.97	1424.34-2422.10	47	992.178	769.65-1233.35	15	1947.76	1263.97-2997.59	41	1.71897e-05	0.983316	0.00240965
TIMP total T1	44.3674	2.3214e-10	0.423674	Large	TRUE	623368	514451.35-788987.87	47	453830	346310.42-474984.28	15	409987	270314.86-432714.93	41	7.45283e-05	3.92809e-10	0.08531
TNF-alpha T1	45.7642	1.15458e-10	0.442063	Large	TRUE	37.93	19.78-57.40	45	4.1	2.47-8.28	17	6.95	2.57-14.53	40	1.05002e-07	1.17922e-08	0.130919

## Sheet: Key_Findings_Large_Effects
Rank	Biomarker	Eta_Squared	Effect_Size_Interpretation	P_Value	Kruskal_H_Statistic	MIS-C/KD_Median	Healthy_Controls_Median	Febrile_Controls_Median	MIS-C/KD vs Healthy_Controls_P_Value	MIS-C/KD vs Febrile_Controls_P_Value	Healthy_Controls vs Febrile_Controls_P_Value
1	TIMP-1 T1	0.488474	Large	9.09134e-12	50.8474	346720	151241	217694	9.18938e-08	1.90255e-09	0.0187867
2	MMP-8 T1	0.465585	Large	4.43454e-12	52.2832	49861.8	5072.36	8463.75	4.66933e-10	6.14323e-09	0.184892
3	MMP-3 T1	0.449213	Large	1.34388e-11	50.0657	9063.35	1837.09	2136.29	2.27414e-09	9.69476e-09	0.17731
4	TNF-alpha T1	0.442063	Large	1.15458e-10	45.7642	37.93	4.1	6.95	1.05002e-07	1.17922e-08	0.130919
5	TIMPT total T1	0.423674	Large	2.3214e-10	44.3674	623368	453830	409987	7.45283e-05	3.92809e-10	0.08531
6	MMP-3/TIMP-2 T1	0.373087	Large	4.22915e-09	38.5625	0.0629512	0.014634	0.0182704	8.18826e-07	3.29485e-07	0.136156
7	MMP-8/TIMP-2 T1	0.37163	Large	3.77187e-09	38.7914	0.395424	0.0588465	0.0689668	4.47916e-06	4.48593e-08	0.568689
8	MMP-12 T1	0.342846	Large	7.33481e-08	32.8561	60.2851	57.78	35.7605	0.760179	4.0311e-07	3.44719e-06
9	MMP-2/TIMP-1 T1	0.327649	Large	1.45336e-07	31.4884	0.926469	1.99666	1.58755	1.79903e-05	3.96883e-06	0.118447
10	MMP-8/TIMP-4 T1	0.316871	Large	5.67216e-08	33.3702	28.3487	8.00411	5.40681	0.00102215	3.37541e-08	0.338863
11	MMP-7 T1	0.268152	Large	1.89244e-07	30.9605	3593.91	1962.99	2522.45	2.86791e-08	0.000452246	0.0783508
12	MMP-1/TIMP-1 T1	0.254319	Large	1.25448e-06	27.1776	0.0063286	0.0264789	0.0115343	4.63534e-05	1.84581e-05	0.119856
13	MMP-12/TIMP-1 T1	0.227793	Large	1.29986e-05	22.5013	0.000165445	0.000387883	0.000177831	1.15816e-06	0.1374	0.00128087
14	TIMP-3 T1	0.225255	Large	4.7244e-06	24.5255	62568.1	87193	38945.7	0.668858	1.79716e-06	0.00254733
15	MMP-8/TIMP-1 T1	0.219261	Large	7.11415e-06	23.7069	0.112789	0.0428243	0.0455497	0.000204715	2.48838e-05	0.794216

## Sheet: Effect_Size_Summary_New
Effect_Size_Category	Count
Large (η² ≥ 0.14)	24
Medium (0.06 ≤ η² < 0.14)	12
Small (0.01 ≤ η² < 0.06)	12
Negligible (η² < 0.01)	4

## Sheet: Pairwise_Comparisons
Biomarker	Comparison	P_Value	Significant_Pairwise
EMMPRIN CD147 T1	MIS-C/KD vs Febrile_Controls	8.32922e-05	TRUE
EMMPRIN CD147 T1	MIS-C/KD vs Healthy_Controls	0.0101443	TRUE
EMMPRIN CD147 T1	Healthy_Controls vs Febrile_Controls	0.100321	FALSE
MMP-1 T1	MIS-C/KD vs Healthy_Controls	0.00258816	TRUE
MMP-1 T1	Healthy_Controls vs Febrile_Controls	0.0281405	TRUE
MMP-1 T1	MIS-C/KD vs Febrile_Controls	0.29758	FALSE
MMP-1/TIMP-1 T1	MIS-C/KD vs Febrile_Controls	1.84581e-05	TRUE
MMP-1/TIMP-1 T1	MIS-C/KD vs Healthy_Controls	4.63534e-05	TRUE
MMP-1/TIMP-1 T1	Healthy_Controls vs Febrile_Controls	0.119856	FALSE
MMP-1/TIMP-2 T1	MIS-C/KD vs Healthy_Controls	0.0210677	TRUE
MMP-1/TIMP-2 T1	MIS-C/KD vs Febrile_Controls	0.0564985	FALSE
MMP-1/TIMP-2 T1	Healthy_Controls vs Febrile_Controls	0.283566	FALSE
MMP-10 T1	MIS-C/KD vs Febrile_Controls	0.0323239	TRUE
MMP-10 T1	MIS-C/KD vs Healthy_Controls	0.0756633	FALSE
MMP-10 T1	Healthy_Controls vs Febrile_Controls	0.826208	FALSE
MMP-12 T1	MIS-C/KD vs Febrile_Controls	4.0311e-07	TRUE
MMP-12 T1	Healthy_Controls vs Febrile_Controls	3.44719e-06	TRUE
MMP-12 T1	MIS-C/KD vs Healthy_Controls	0.760179	FALSE
MMP-13 T1	MIS-C/KD vs Healthy_Controls	0.00791895	TRUE
MMP-13 T1	Healthy_Controls vs Febrile_Controls	0.0134941	TRUE
MMP-13 T1	MIS-C/KD vs Febrile_Controls	0.845127	FALSE
MMP-2/TIMP-1 T1	MIS-C/KD vs Febrile_Controls	3.96883e-06	TRUE
MMP-2/TIMP-1 T1	MIS-C/KD vs Healthy_Controls	1.79903e-05	TRUE
MMP-2/TIMP-1 T1	Healthy_Controls vs Febrile_Controls	0.118447	FALSE
MMP-3 T1	MIS-C/KD vs Healthy_Controls	2.27414e-09	TRUE
MMP-3 T1	MIS-C/KD vs Febrile_Controls	9.69476e-09	TRUE
MMP-3 T1	Healthy_Controls vs Febrile_Controls	0.17731	FALSE
MMP-3/TIMP-1 T1	MIS-C/KD vs Healthy_Controls	7.1756e-05	TRUE
MMP-3/TIMP-1 T1	MIS-C/KD vs Febrile_Controls	0.00373246	TRUE
MMP-3/TIMP-1 T1	Healthy_Controls vs Febrile_Controls	0.447294	FALSE
MMP-7 T1	MIS-C/KD vs Healthy_Controls	2.86791e-08	TRUE
MMP-7 T1	MIS-C/KD vs Febrile_Controls	0.000452246	TRUE
MMP-7 T1	Healthy_Controls vs Febrile_Controls	0.0783508	FALSE
MMP-8 T1	MIS-C/KD vs Healthy_Controls	4.66933e-10	TRUE
MMP-8 T1	MIS-C/KD vs Febrile_Controls	6.14323e-09	TRUE
MMP-8 T1	Healthy_Controls vs Febrile_Controls	0.184892	FALSE
MMP-9/TIMP-1 T1	MIS-C/KD vs Febrile_Controls	0.00393745	TRUE
MMP-9/TIMP-1 T1	MIS-C/KD vs Healthy_Controls	0.0548648	FALSE
MMP-9/TIMP-1 T1	Healthy_Controls vs Febrile_Controls	0.642993	FALSE
TIMP-1 T1	MIS-C/KD vs Febrile_Controls	1.90255e-09	TRUE
TIMP-1 T1	MIS-C/KD vs Healthy_Controls	9.18938e-08	TRUE
TIMP-1 T1	Healthy_Controls vs Febrile_Controls	0.0187867	TRUE
TIMP-3 T1	MIS-C/KD vs Febrile_Controls	1.79716e-06	TRUE
TIMP-3 T1	Healthy_Controls vs Febrile_Controls	0.00254733	TRUE
TIMP-3 T1	MIS-C/KD vs Healthy_Controls	0.668858	FALSE
TIMP-4 T1	MIS-C/KD vs Healthy_Controls	1.71897e-05	TRUE
TIMP-4 T1	Healthy_Controls vs Febrile_Controls	0.00240965	TRUE
TIMP-4 T1	MIS-C/KD vs Febrile_Controls	0.983316	FALSE
TNF-alpha T1	MIS-C/KD vs Febrile_Controls	1.17922e-08	TRUE
TNF-alpha T1	MIS-C/KD vs Healthy_Controls	1.05002e-07	TRUE
TNF-alpha T1	Healthy_Controls vs Febrile_Controls	0.130919	FALSE

## Sheet: Summary
Category	Count
Total Biomarkers Tested	21
Significant Differences (p<0.05)	17
Percentage Significant	81

## Sheet: Top_10_Significant
Biomarker	P_Value	MIS-C/KD_Median	Healthy_Controls_Median	Febrile_Controls_Median
MMP-8 T1	4.43454e-12	49861.8	5072.36	8463.75
TIMP-1 T1	9.09134e-12	346720	151241	217694
MMP-3 T1	1.34388e-11	9063.35	1837.09	2136.29
TNF-alpha T1	1.15458e-10	37.93	4.1	6.95
MMP-12 T1	7.33481e-08	60.2851	57.78	35.7605
MMP-2/TIMP-1 T1	1.45336e-07	0.926469	1.99666	1.58755
MMP-7 T1	1.89244e-07	3593.91	1962.99	2522.45
MMP-1/TIMP-1 T1	1.25448e-06	0.0063286	0.0264789	0.0115343
TIMP-3 T1	4.7244e-06	62568.1	87193	38945.7
EMMPRIN CD147 T1	0.000132944	8812.36	7313.7	6123.49

## Sheet: Effect_Size_Summary
Effect_Size_Category	Count
Large (η² ≥ 0.14)	10
Medium (0.06 ≤ η² < 0.14)	4
Small (0.01 ≤ η² < 0.06)	4
Negligible (η² < 0.01)	3

## Sheet: Top_10_EffectSizes
Biomarker	Kruskal_H_Statistic	P_Value	Eta_Squared	Effect_Size_Interpretation
MMP-8 T1	52.2832	4.43454e-12	0.4656	Large
TIMP-1 T1	50.8474	9.09134e-12	0.4523	Large
MMP-3 T1	50.0657	1.34388e-11	0.4451	Large
TNF-alpha T1	45.7642	1.15458e-10	0.4052	Large
MMP-12 T1	32.8561	7.33481e-08	0.2857	Large
MMP-2/TIMP-1 T1	31.4884	1.45336e-07	0.273	Large
MMP-7 T1	30.9605	1.89244e-07	0.2682	Large
MMP-1/TIMP-1 T1	27.1776	1.25448e-06	0.2331	Large
TIMP-3 T1	24.5255	4.7244e-06	0.2086	Large
EMMPRIN CD147 T1	17.8512	0.000132944	0.1468	Large
