# Supplementary material
Source: Research Square preprint supplement (doi:10.21203/rs.3.rs-7754190/v1)
Supplement: Supplementary file 8 [file edee5a19c8d3ad4493b26a9d.xlsx]

## Sheet: Demographic_and_clinical_comp
Variable	All Patients	MIS-C	KD	p-value
Age (years)	8.3 (3.5-12.1)	9.4 (4.1-12.6)	2.2 (1.2-3.1)	0.004
Length of stay (days)	12.0 (9.0-15.5)	12.0 (9.0-15.0)	15.0 (10.0-19.0)	0.477
Total days of fever	6.0 (5.5-8.0)	6.5 (5.2-8.0)	6.0 (6.0-7.0)	0.563
CRP (mg/L)	175.4 (119.6-250.3)	183.7 (130.8-259.5)	101.0 (55.4-174.0)	0.060
ESR (mm/h)	50.0 (23.0-73.0)	46.5 (18.8-71.0)	72.0 (60.0-73.0)	0.114
PCT (ng/mL)	4.6 (1.5-12.4)	5.4 (1.7-14.5)	0.8 (0.4-1.8)	0.037
WBC (k/mcL)	12.5 (8.6-18.0)	12.4 (8.6-16.7)	16.5 (11.8-20.9)	0.501
Male gender	25/47 (53.2%)	24/42 (57.1%)	1/5 (20.0%)	0.171
Cough	18/47 (38.3%)	17/42 (40.5%)	1/5 (20.0%)	0.636
Hypotension on admission	31/47 (66.0%)	31/42 (73.8%)	0/5 (0.0%)	0.003
Shock on admission	6/47 (12.8%)	6/42 (14.3%)	0/5 (0.0%)	1.000
ICU admission	3/47 (6.4%)	3/42 (7.1%)	0/5 (0.0%)	1.000
Catecholamines use	3/47 (6.4%)	3/42 (7.1%)	0/5 (0.0%)	1.000
Neurological involvement	6/47 (12.8%)	6/42 (14.3%)	0/5 (0.0%)	1.000
Gastrointestinal involvement	33/47 (70.2%)	31/42 (73.8%)	2/5 (40.0%)	0.148
Elevated troponin/NT-pro-BNP	35/47 (74.5%)	34/42 (81.0%)	1/5 (20.0%)	0.012
Decreased LV contractility	18/47 (38.3%)	18/42 (42.9%)	0/5 (0.0%)	0.141
Pericardial effusion	10/47 (21.3%)	10/42 (23.8%)	0/5 (0.0%)	0.569
Coronary artery aneurysm	1/47 (2.1%)	1/42 (2.4%)	0/5 (0.0%)	1.000
Liver involvement	13/47 (27.7%)	11/42 (26.2%)	2/5 (40.0%)	0.607
Renal involvement	8/47 (17.0%)	8/42 (19.0%)	0/5 (0.0%)	0.571
Lung involvement	37/47 (78.7%)	34/42 (81.0%)	3/5 (60.0%)	0.285
Prolonged APTT/INR	17/47 (36.2%)	17/42 (40.5%)	0/5 (0.0%)	0.143
D-dimer >2000	31/47 (66.0%)	30/42 (71.4%)	1/5 (20.0%)	0.040
Lymphopenia	32/47 (68.1%)	31/42 (73.8%)	1/5 (20.0%)	0.030
SARS-CoV-2 infection	40/47 (85.1%)	39/42 (92.9%)	1/5 (20.0%)	0.001
Hyponatremia	35/47 (74.5%)	33/42 (78.6%)	2/5 (40.0%)	0.097
High-dose steroids	10/47 (21.3%)	10/42 (23.8%)	0/5 (0.0%)	0.569
Moderate-dose steroids	9/47 (19.1%)	8/42 (19.0%)	1/5 (20.0%)	1.000

## Sheet: Biomarkers_all
Biomarker	N_MIS-C	N_KD	Median_MIS-C	Median_KD	P_value	Significant
TIMP-1 T1	42	5	354015	299264	0.167361	FALSE
TIMP-1 T2	30	4	380987	274810	0.0557185	FALSE
TIMP-1 FC	30	4	0.899536	1.03191	0.518587	FALSE
TIMP-2 T1	42	5	130394	120660	0.409358	FALSE
TIMP-2 T2	30	3	117376	104131	0.883065	FALSE
TIMP-2 FC	30	3	0.89533	1.06107	0.188416	FALSE
TIMP-3 T1	42	5	62568.1	74382.1	0.407151	FALSE
TIMP-3 T2	30	4	91609.6	172312	0.470334	FALSE
TIMP-3 FC	30	4	1.39227	1.00034	0.179878	FALSE
TIMP-4 T1	42	5	2057	1591.11	0.437531	FALSE
TIMP-4 T2	30	4	1474.17	1364.04	0.668786	FALSE
TIMP-4 FC	30	4	0.724486	0.873912	0.198422	FALSE
TIMPT total T1	42	5	623990	622261	0.750547	FALSE
TIMP total T2	30	3	591970	631315	0.416422	FALSE
TIMP total FC	30	3	0.943629	0.968207	0.883065	FALSE
EMMPRIN CD147 T1	42	5	8837.61	8728.07	0.77612	FALSE
EMMPRIN CD147 T2	30	4	5657.57	6333.78	0.856909	FALSE
EMMPRIN FC	30	4	0.636683	0.819446	0.392487	FALSE
MMP-1 T1	42	5	1940.14	2039.99	0.906857	FALSE
MMP-1 T2	30	4	8660.35	3466.54	0.179878	FALSE
MMP-1 FC	30	4	3.06259	1.60659	0.0360963	TRUE
MMP-2 T1	42	5	362712	335225	0.228358	FALSE
MMP-2 T2	30	4	348727	329798	0.661247	FALSE
MMP-2 FC	30	4	0.954605	1.2996	0.131275	FALSE
MMP-3 T1	42	5	8383.92	9734.38	0.880413	FALSE
MMP-3 T2	30	4	9900.71	4184.21	0.661247	FALSE
MMP-3 FC	30	4	0.993991	1.10872	0.897447	FALSE
MMP-7 T1	42	5	3205.77	5234.01	0.0813618	FALSE
MMP-7 T2	30	4	2769.27	4449.2	0.00521822	TRUE
MMP-7 FC	30	4	0.686994	0.806808	0.518587	FALSE
MMP-8 T1	41	5	47596.5	60944.9	0.972729	FALSE
MMP-8 T2	30	4	7684.1	17552.8	0.552915	FALSE
MMP-8 FC	30	4	0.204779	0.232409	1	FALSE
MMP-9 T1	42	5	235082	544429	0.397913	FALSE
MMP-9 T2	30	4	215395	370728	0.552915	FALSE
MMP-9 FC	30	4	0.752019	0.49729	0.310376	FALSE
MMP-10 T1	42	5	838.205	2276.84	0.0435392	TRUE
MMP-10 T2	29	4	543.88	1259.98	0.143781	FALSE
MMP-10 FC	29	4	0.685931	0.546577	0.576149	FALSE
MMP-12 T1	42	5	60.2851	59.66	0.890164	FALSE
MMP-12 T2	30	4	65.6366	71.805	0.391296	FALSE
MMP-12 FC	30	4	1	1.01941	0.649081	FALSE
MMP-13 T1	34	3	994.854	1299.6	0.190386	FALSE
TNF-alpha T1	41	5	37.93	34.89	0.458611	FALSE
TNF-alpha T2	29	4	15.0902	20.905	0.977994	FALSE
TNF-alpha FC	29	4	0.539716	0.778725	0.294721	FALSE
MMP-1/TIMP-1 T1	42	5	0.0060555	0.009212	0.534536	FALSE
MMP-1/TIMP-1 T2	30	4	0.0224175	0.011422	0.285406	FALSE
MMP-1/TIMP-2 T1	42	5	0.0143255	0.019475	0.700191	FALSE
MMP-1/TIMP-2 T2	30	3	0.071276	0.023586	0.433602	FALSE
MMP-1/TIMP-3 T1	42	5	0.034175	0.009948	0.28665	FALSE
MMP-1/TIMP-3 T2	30	4	0.0793595	0.037076	0.102882	FALSE
MMP-1/TIMP-4 T1	42	5	1	1.62	0.782491	FALSE
MMP-1/TIMP-4 T2	30	4	6.275	1.91	0.218346	FALSE
MMP-2/TIMP-1 T1	42	5	0.94	0.82	0.944972	FALSE
MMP-2/TIMP-1 T2	30	4	0.875	1.07	0.630284	FALSE
MMP-2/TIMP-2 T1	42	5	2.635	2.34	0.378908	FALSE
MMP-2/TIMP-2 T2	30	3	2.735	2.35	0.0307081	TRUE
MMP-2/TIMP-3 T1	42	5	5.95	4.96	0.184041	FALSE
MMP-2/TIMP-3 T2	30	4	4.33	2.78	0.688455	FALSE
MMP-2/TIMP-4 T1	42	5	181.605	166.86	0.801913	FALSE
MMP-2/TIMP-4 T2	30	4	193.78	211.545	0.518587	FALSE
MMP-3/TIMP-1 T1	42	5	0.0213565	0.03124	0.409358	FALSE
MMP-3/TIMP-1 T2	30	4	0.025056	0.015274	0.856909	FALSE
MMP-3/TIMP-2 T1	42	5	0.059465	0.070423	0.666211	FALSE
MMP-3/TIMP-2 T2	30	3	0.0734	0.03257	0.683849	FALSE
MMP-3/TIMP-3 T1	42	5	0.12	0.13	0.556886	FALSE
MMP-3/TIMP-3 T2	30	4	0.0808805	0.059126	0.250392	FALSE
MMP-3/TIMP-4 T1	42	5	5.315	5.7	0.933403	FALSE
MMP-3/TIMP4 T2	30	4	6.015	2.92	0.261816	FALSE
MMP-7/TIMP-1 T1	42	5	0.009866	0.019035	0.0071167	TRUE
MMP-7/TIMP-1 T2	30	4	0.007319	0.018086	0.0154821	TRUE
MMP-7/TIMP-2 T1	42	5	0.029024	0.040138	0.0145742	TRUE
MMP-7/TIMP-2 T2	30	3	0.0233915	0.047583	0.167889	FALSE
MMP-7/TIMP-3 T1	42	5	0.064535	0.077191	0.944976	FALSE
MMP-7/TIMP-3 T2	30	4	0.0302895	0.032041	0.979386	FALSE
MMP-7/TIMP-4 T1	42	5	2.165	3.29	0.0976706	FALSE
MMP-7/TIMP-4 T2	30	4	2.555	3.675	0.851584	FALSE
MMP-8/TIMP-1 T1	42	5	0.0987115	0.2	0.397722	FALSE
MMP-8/TIMP-1 T2	30	4	0.020877	0.057436	0.335942	FALSE
MMP-8/TIMP-2 T1	42	5	0.395	0.44	0.592723	FALSE
MMP-8/TIMP-2 T2	30	3	0.0737555	0.13	0.0967928	FALSE
MMP-8/TIMP-3 T1	42	5	0.61	0.32	0.360498	FALSE
MMP-8/TIMP-3 T2	30	4	0.0908795	0.0746875	0.728241	FALSE
MMP-8/TIMP-4 T1	42	5	27.795	39.73	0.557023	FALSE
MMP-8/TIMP-4 T2	30	4	7.625	9.165	0.76875	FALSE
MMP-9/TIMP-1 T1	42	5	0.785	1.85	0.142508	FALSE
MMP-9/TIMP-1 T2	30	4	0.605	1.14	0.209	FALSE
MMP-9/TIMP-2 T1	42	5	1.83	5.26	0.269492	FALSE
MMP-9/TIMP-2 T2	30	3	2.02	3.24	0.178107	FALSE
MMP-9/TIMP-3 T1	42	5	3.39	2.05	0.809139	FALSE
MMP-9/TIMP-3 T2	30	4	1.89	2.03	0.938416	FALSE
MMP-9/TIMP-4 T1	30	4	113.84	256.36	0.310376	FALSE
MMP-9/TIMP-4 T2	30	4	190.97	145.89	0.737623	FALSE
MMP-10/TIMP-1 T1	42	5	0.00273449	0.00732371	0.0101999	TRUE
MMP-10/TIMP-1 T2	29	4	0.00138559	0.00433551	0.105425	FALSE
MMP-10/TIMP-2 T1	42	5	0.00717383	0.0164717	0.0101999	TRUE
MMP-10/TIMP-2 T2	29	3	0.00406571	0.00695763	0.16371	FALSE
MMP-10/TIMP-3 T1	42	5	0.0112451	0.0306101	0.534536	FALSE
MMP-10/TIMP-3 T2	29	4	0.00608568	0.00968632	0.978739	FALSE
MMP-10/TIMP-4 T1	42	5	0.44895	1.4591	0.0226059	TRUE
MMP-10/TIMP-4 T2	29	4	0.4893	0.6288	0.894184	FALSE
MMP-12/TIMP-1 T1	42	5	0.000161687	0.000199355	0.319031	FALSE
MMP-12/TIMP-1 T2	30	4	0.000157333	0.000262247	0.218346	FALSE
MMP-12/TIMP-2 T1	42	5	0.000510623	0.000463511	0.880413	FALSE
MMP-12/TIMP-2 T2	30	3	0.000583423	0.000641883	0.700513	FALSE
MMP-12/TIMP-3 T1	42	5	0.000850923	0.000615287	0.292625	FALSE
MMP-12/TIMP-3 T2	30	4	0.000549612	0.000302736	0.261816	FALSE
MMP-12/TIMP-4 T1	42	5	0.0317669	0.0285418	0.906857	FALSE
MMP-12/TIMP-4 T2	30	4	0.0450822	0.057183	0.938416	FALSE
MMP-13/TIMP-1 T1	34	3	0.00229657	0.00317837	0.182754	FALSE
MMP-13/TIMP-2 T1	34	3	0.00640006	0.00902661	0.104505	FALSE
MMP-13/TIMP-3 T1	34	3	0.0184632	0.0191665	0.540428	FALSE
MMP-13/TIMP-4 T1	34	3	0.41785	0.8168	0.202059	FALSE

## Sheet: Biomarkers_significant_only
Biomarker	N_MIS-C	N_KD	Median_MIS-C	Median_KD	P_value	Significant	fold_difference	log_p
MMP-7 T2	30	4	2769.27	4449.2	0.00521822	TRUE	1.60663	2.28248
MMP-7/TIMP-1 T1	42	5	0.009866	0.019035	0.0071167	TRUE	1.92935	2.14772
MMP-10/TIMP-1 T1	42	5	0.00273449	0.00732371	0.0101999	TRUE	2.67827	1.9914
MMP-10/TIMP-2 T1	42	5	0.00717383	0.0164717	0.0101999	TRUE	2.29608	1.9914
MMP-7/TIMP-2 T1	42	5	0.029024	0.040138	0.0145742	TRUE	1.38292	1.83641
MMP-7/TIMP-1 T2	30	4	0.007319	0.018086	0.0154821	TRUE	2.4711	1.81017
MMP-10/TIMP-4 T1	42	5	0.44895	1.4591	0.0226059	TRUE	3.25003	1.64578
MMP-2/TIMP-2 T2	30	3	2.735	2.35	0.0307081	TRUE	0.859232	1.51275
MMP-1 FC	30	4	3.06259	1.60659	0.0360963	TRUE	0.524585	1.44254
MMP-10 T1	42	5	838.205	2276.84	0.0435392	TRUE	2.71633	1.36112
